# Supplementary material
Source: Springer Nature journal article supplement (http://publikationen.ub.uni-frankfurt.de/opus4/files/1594/12977_2006_740_MOESM1_ESM.pdf)

```

**      *****
M10060 CAATTGGGGGCTCGTCCGGG-----ATTTGAATTCTCCAT-----TCTCACA-----TTATGGGACAAATCCACGGGCT-T-T- 67
NC_001488 CAATTGGGGGCTCGTCCGGG-----ATTTGAATTCTCCAT-----TCTCACA-----TTATGGGACAAATCCACGGGCT-T-T- 67
AF412314 CAATTGGGGGCTCGTCCGGG-----ATTTGAATTCTCCAT-----TCTCACA-----TTATGGGACAAATCCACGGGCT-T-T- 67
AF139382 CAATTGGGGGCTCGTCCGGG-----ATCTGAATTCTCCAT-----TCTCACA-----TTATGGGACAAATCCACGGGCT-T-T- 67
AF326584 CAATTGGGGGCTCGTCCGGG-----ATCTGAATTCTCCAT-----TCTCACA-----TTATGGGACAAATCCACGGGCT-T-T- 67
AF326583 CAATTGGGGGCTCGTCCGGG-----ATCTGAATTCTCCAT-----TCTCACA-----TTATGGGACAAATCCACGGGCT-T-T- 67
L20734 CAAGTGGGGGCTCGTCCGGG-----ATCTGAATTCTCCAT-----TCTCACA-----TTATGGGGCAAATCCACGGGCT-T-T- 67
Y13051 CAAGTGGGGGCTCGTCCGGG-----ATCTGAATTCTCCAT-----TCTCACA-----TTATGGGGCAAATCCACGGGCT-T-T- 67
L11456 CAAGTGGGGGCTCGTCCGGG-----ATTTGAAC-CCGGGACC-----TCTCGCA-----TTATGGGGCAAATCCACGGGCT-T-T- 67
X89270 CAAGTGGGGGCTCGTCCGGG-----ATTTGAATTCTCCAT-----TCTCACA-----TTATGGGGCAAATCCACGGGCT-T-T- 67
AF074965 CAAGTGGGGGCTCGTCCGGG-----ATCTGAATTCTCCAT-----TCTCACA-----TTATGGGGCAAATCCACGGGCT-T-T- 67
Y14365 CAAGTGGGGGCTCGTCCGGG-----ATCTGAATCCCTCCAT-----TCCCACA-----TTATGGGACAAATCCACGGGCT-T-T- 67
Y14570 CAAGTGGGGGCTCGTCCGGG-----ATACCTACCCCTGCC-----TCTCGCA-----TTATGGGACAAAACCTACGGCCT-C-T- 67
NC_001815 CAAGTGGGGGCTCGTCCGGG-----ATACCTACCCCTGCC-----TCTCGCA-----TTATGGGACAAAACCTACGGCCT-C-T- 67
U90557 CAAGTGGGGGCTCGTCCGGGG-----ATACCTACCCCTGCC-----TCTCGCA-----TTATGGGACAAAACCTACGGCCT-C-T- 68
Y07616 CAGTTGGGGGCTCGTCCGGGATTGATCACCTCT---CTGTGTCTGCCCTTCCCT-----TATCGAAG-----CCATGGGAAAGACTTATAG-CT-C-TC 83
AY217650 CAGGTGGGGGCTCGTCCGGGATAGATTACCTCT---CTGTGTCTGCCCTTCCCT-----TGTGAAG-----CCATGGGAAAGACTTTTAG-CT-C-CC 83
AF517775 CAGGTGGGGGCTCGTCCGGGATTGATCACCTCT---CTGTATCTGCCCTTCCCT-----ATCGAAG-----CCATGGGAAAGACTTATAG-CT-C-CC 82
AY22339 CAGGTGGGGGCTCGTCCGGGATCGACCACCTCT---CTGTATCTGCCCTTCCCT-----ATCAAAG-----CCATGGGAAAGACTTATAG-CT-C-TC 82
NC_003323 CAGGTGGGGGCTCGTCCGGGATCGATCACCTCT---CTGTATCTGCCCTTCCCT-----AATCAGAA-----CCATGGGAAAGACTTATAG-CT-C-TC 83
L36905 CAGTTGGGGGCTCGTCCGGGAT-----ACGAGCGCCCCTTTAT-----TCCCTAGG-----CAATGGGCCAAATCCTTT--TCC-CGTA 70
AF139170 CAGTTGGGGGCTCGTCCGGGAT-----ACGAGCGCCCCTTTAT-----TCCCTAGG-----CAATGGGCCAAATCCTTT--TCC-CGTA 70
AF042071 CAGTTGGGGGCTCGTCCGGGAT-----ACGAGCGCCCCTTTAT-----TCCCTAGG-----CAATGGGCCAAATCCTTT--TCC-CGTA 70
L03561 CAGTTGGGGGCTCGTCCGGGAT-----ACGAGCGCCCCTTTAT-----TCCCTAGG-----CAATGGGCCAAATCCTTT--TCC-CGTA 70
AF259264 CAGTTGGGGGCTCGTCCGGGAT-----ACGAGCGCCCCTTTAT-----TCCCTAGG-----CAATGGGCCAAATCCTTT--TCC-CGTA 70
AY563953 CAGTTGGGGGCTCGTCCGGGAT-----CCGAGCGCCCCTTTAT-----TCCCTAGG-----CAATGGGCCAAATCCTTT--TCC-CGTA 70
AY563954 CAGTTGGGGGCTCGTCCGGGAT-----ACGAGCGCCCCTTTAT-----TCCCTAGG-----CAATGGGCCAAATCCTTT--TCC-CGTA 70
U19949 CAGTTGGGGGCTCGTCCGGGAT-----ACGAGCGCCCCTTTAT-----TCCCTAGG-----CAATGGGCCAAATCCTTT--TCC-CGTA 70
J02029 CAGTTGGGGGCTCGTCCGGGAT-----ACGAGCGCCCCTTTAT-----TCCCTAGG-----CAATGGGCCAAATCCTTT--TCC-CGTA 70
D13748 CAGTTGGGGGCTCGTCCGGGAT-----TCGAGCGCCCCTTTAT-----TCCCTAGG-----CAATGGGCCAAATCCTTT--TCC-CGTA 70
AF033817 CAGTTGGGGGCTCGTCCGGGAT-----TCGAGCGCCCCTTTAT-----TCCCTAGG-----CAATGGGCCAAATCCTTT--TCC-CGTA 70
NC_001436 CAGTTGGGGGCTCGTCCGGGAT-----TCGAGCGCCCCTTTAT-----TCCCTAGG-----CAATGGGCCAAATCCTTT--TCC-CGTA 70
AF074966 CAGGTGGGGGCTCGTCCGGGAT-----ACGAGCGCCCCTTTAT-----TCCCTAGG-----CAATGGGCCAAATCCTTT--TCC-CGTA 70
NC_000858 CAGGTGGGGGCTCGTCCGGGAT-----ACGAGCGCCCCTTTAT-----TCCCTAGG-----CAATGGGCCAAATCCTTT--TCC-CGTA 70
L02534 CAGTTGGGGGCTCGTCCGGGATTCTA-----ACGAGCGCCCCTTTAT-----TCCCTAGG-----CAATGGGCCAAATCCTT--CCT-CGTA 74
Z46900 CAGTTGGGGGCTCGTCCGGGAT-----TTGAGCGCCCCCTCTAT-----TCTCTAGG-----CAATGGGCCAAATATTC--CCC-CGTA 70
AY590142 CAGTTGGGGGCTCGTCCGGGATCTGAA-----CCCCCGCCCCCTCCTCTCGCTCCCTAGGA-----CAATGGGCCAAATCATT--CCC-CGGG 82
AF033818 CAATTGGGGGCTCGTCCGGGATTGATCACCCCGGAACCCTAACGATC-CTCTGGACCCACCCCTCGGCGGCGTTTTGGGTCTTCCTTTAAATTATATC 99
NC_001414 CAATTGGGGGCTCGTCCGGGATTGATCACCCCGGAAACCTAACGATC-CTCTGGACCCACCCCTCGGCGGCGTTTTGGGTCTTCCTTTAAATTATATC 99
K02120 CAATTGGGGGCTCGTCCGGGATTGATCACCCCGGAAACCTAACAACT-CTCTGGACCCACCCCTCGGCGGCGTTTTGGGTCTTCCTTCAAATTATATC 99
D00647 CAATTGGGGGCTCGTCCGGGATTGATCACCCCGGAAACCTAA-AACTTCTCTGGACCCACCCCTCGGCGGCGTCTTGGGTCTTCCTTCAAATCATATC 99
AF257515 CAATTGGGGGCTCGTCCGGGATTGATCACCCCGGAAACCTAACAATT-CTCTGGACCCACCCCTCGGCGGCGTTTTGGGTCTTCCTTCAAATTATACT 99

```

ruler 1.....10.....20.....30.....40.....50.....60.....70.....80.....90.....100

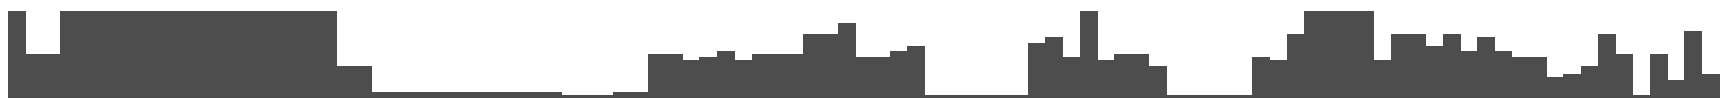

```

      *   **      **   *   *   *   *   **   *** * ** * * **   *   *   *   *   *   *   *   *   *
M10060 -C-CCCAACTCCAATACCCAAAGCC-CCCAGGGGGCTATCAACCCACCA--CTGGCTTAACTTTCTCCAGGCTGCTTACCGCTTGAGCCTA-GGCCCTC 161
NC_001488 -C-CCCAACTCCAATACCCAAAGCC-CCCAGGGGGCTATCAACCCACCA--CTGGCTTAACTTTCTCCAGGCTGCTTACCGCTTGAGCCTA-GGCCCTC 161
AF412314 -C-CCCAACTCCAATACCCAAAGCC-CCCAGGGGGCTATCGACCCACCA--CTGGCTTAACTTTCTCCAGGCTGCTTACCGCTTGAGCCTG-GGCCCTC 161
AF139382 -C-CCCAACTCCAATACCCAAAGCC-CCCAGGGGGCTATCGACCCACCA--CTGGCTTAACTTTCTCCAGGCTGCTTATCGCTTGAGCCTG-GGCCCTC 161
AF326584 -C-CCCAACTCCAATACCCAAAGCC-CCCAGGGGGCTATCGACCCACCA--CTGGCTTAACTTTCTCCAGGCTGCTTACCGCTTGAGCCTG-GGCCCTC 161
AF326583 -C-CCCAACTCCAATACCCAAAGCC-CCCAGGGGGCTATCGACCCACCA--CTGGCTTAACTTTCTCCAGGCTGCTTACCGCTTGAGCCTG-GGCCCTC 161
L20734 -C-CCCAACTCCAATACCCAAAGGCC-CCCAGGGGGCTATCGACCCACCA--CTGGCTTAAATTTTCTCCAGGCTGCTTACCGCTTGAGCCTG-GGCCCTC 161
Y13051 -C-CCCAACTCCAATACCCAAAGGCC-CCCAGGGGGCTATCGACCCACCA--CTGGCTTAAATTTTCTCCAGGCTGCTTACCGCTTGAGCCTG-GGCCCTC 161
L11456 -C-CCCAACTCCAATACCCAAAGGCC-CCCAGGGGGCTATCGACCCACCA--CTGGCTTAAATTTTCTCCAGGCTGCTTACCGCTTGAGCCTG-GGCCCTC 161
X89270 -C-CCCAACTCCAATACCCAAAGGCC-CCCAGGGGGCTATCGACCCACCA--CTGGCTTAAATTTTCTCCAGGCTGCTTACCGCTTGAGCCTG-GGCCCTC 161
AF074965 -C-CCCAACTCCAATACCCAAAGGCC-CCCAGGGGGCTATCGACCCACCA--CTGGCTTAAATTTTCTCCAGGCTGCTTACCGCTTGAGCCTG-GGCCCTC 161
Y14365 -C-CCCAACTCCAATACCCAAAGGCC-CCCAGGGGGCTATCGACCCACCA--CTGGCTTAACTTTCTCCAGGCTGCTTACCGCTTGAGCCTG-GGCCCTC 161
Y14570 -CGTCCAGC-CCAATCCCCAAGGCC-CCCAGGGGGTTATCAACCCACCA--TTGGTTAAACTTCTCCTCAAGCGCCTACCGGTACAACCTG-GGCCCTC 161
NC_001815 -CGTCCAGC-CCAATCCCCAAGGCC-CCCAGGGGGTTATCAACCCACCA--TTGGTTAAACTTCTCCTCAAGCGCCTACCGGTACAACCTG-GGCCCTC 161
U90557 -CGCCTAGC-CCAATCCCCAAGGCC-CCCAGAGGTTTATCAACCCACCA--CTGGTTAAATTTCTCCTCAAGCCTCCTACCGGTACAACCTG-GGCCCTC 162
Y07616 -CGGCAAAC-CCTATCCCCAAGGCC-CCAAAAGGGCTAGCAATCCACCA--TTGGTTAAACTTCTCCTACAAGCGCCTATCGGTTACAGCCAG-GGCCTTC 177
AY217650 -CGGCAAAC-CCTATCCCCAAGGCC-CCAAAAGGGCTAGCAATCCACCA--TTGGTTAAACTTCTCCTACAAGCGCCTATCGGTTACAGCCAG-GGCCTTC 177
AF517775 -CGACAAAT-CCTATCCCCAAGGCC-CCAAAGGGGCTAGCAATTCACCA--CTGGCTAAACTTCTCCTCAAGCGCGTACCAGTACAGCCAG-GGCCTTC 176
AY222339 -CAACAAAC-CCTATCCCCAAGGCC-CCAAAGGGGCTAGCAATTCACCA--CTGGCTAAACTTCTCCTCAAGCGCGTACCAGTACAGCCAG-GGCCTTC 176
NC_003323 -CGGTAAAC-CCTATCCCCAAGGCC-CCAAAAGGGCTAGCAATTCACCA--CTGGCTAAACTTTCTCCTCAAGCGCGTACCAGTACAGCCAG-GGCCTTC 177
L36905 GC-GCTAGC-CCTAT-TCCGCGGCCGCCAGGGGGCTGGCCGCTCATCA--CTGGCTTAACTTCTCCTCAAGCGGCATATCGCCTAGAACCCG-GTCCCTC 164
AF139170 GC-GCTAGC-CCTAT-TCCGCGGCCGCCAGGGGGCTGGCCGCTCATCA--CTGGCTTAACTTCTCCTCAAGCGGCATATCGCCTAGAACCCG-GTCCCTC 164
AF042071 GC-GCTAGC-CCTAT-TCCGCGGCCGCCAGGGGGCTGGCCGCTCATCA--CTGGCTTAACTTCTCCTCAAGCGGCATATCGCCTAGAACCCG-GTCCCTC 164
L03561 GC-GCTAGC-CCTAT-TCCGCGGCCGCCAGGGGGCTGGCCGCTCATCA--CTGGCTTAACTTCTCCTCAAGCGGCATATCGCCTAGAACCCG-GTCCCTC 164
AF259264 GC-GCTAGC-CCTAT-TCCGCGGCCGCCAGGGGGCTGGCCGCTCATCA--CTGGCTTAACTTCTCCTCAAGCGGCATATCGCCTAGAACCCG-GTCCCTC 164
AY563953 GC-GCTAGC-CCTAT-TCCGCGGCCGCCAGGGGGCTGGCCGCTCATCA--CTGGCTTAACTTCTCCTCAAGCGGCATATCGCCTAGAACCCG-GTCCCTC 164
AY563954 GC-GCTAGC-CCTAT-TCCGCGGCCGCCAGGGGGCTGGCCGCTCATCA--CTGGCTTAACTTCTCCTCAAGCGGCATATCGCCTAGAACCCG-GTCCCTC 164
U19949 GC-GCTAGC-CCTAT-TCCGCGGCCGCCAGGGGGCTGGCCGCTCATCA--CTGGCTTAACTTCTCCTCAAGCGGCATATCGCCTAGAACCCG-GTCCCTC 164
J02029 GC-GCTAGC-CCTAT-TCCGCGGCCGCCAGGGGGCTGGCCGCTCATCA--CTGGCTTAACTTCTCCTCAAGCGGCATATCGCCTAGAACCCG-GTCCCTC 164
D13748 GC-GCTAGC-CCTAT-TCCGCGGCCGCCAGGGGGCTGGCCGCTCATCA--CTGGCTTAACTTCTCCTCAAGCGGCATATCGCCTAGAACCCG-GTCCCTC 164
AF033817 GC-GCTAGC-CCTAT-TCCGCGGCCGCCAGGGGGCTGGCCGCTCATCA--CTGGCTTAACTTCTCCTCAAGCGGCATATCGCCTAGAACCCG-GTCCCTC 164
NC_001436 GC-GCTAGC-CCTAT-TCCGCGGCCGCCAGGGGGCTGGCCGCTCATCA--CTGGCTTAACTTCTCCTCAAGCGGCATATCGCCTAGAACCCG-GTCCCTC 164
AF074966 GC-GCTAGC-CCTAT-TCCGCGGCCGCCAGGGGGCTGGCTGCTCATCA--CTGGCTTAACTTCTCCTCAAGCGGCATATCGCCTAGAACCCG-GTCCCTC 164
NC_000858 GC-GCTAGC-CCTAT-TCCGCGGCCGCCAGGGGGCTGGCTGCTCATCA--CTGGCTTAACTTCTCCTCAAGCGGCATATCGCCTAGAACCCG-GTCCCTC 164
L02534 GC-GCTAAC-CCTAT-CCCAGCGGCCGCCAGGGGGCTGGCCACTCATCA--CTGGCTTAAATTTCTCCTCAAGCGGCATACCGCTGGAGCCCG-GTCCCTC 168
Z46900 TC-ACTAGC-CCCAT-TCCGCGGCCGCCAGGGGGCTGGCCGCTCACCA--CTGGCTTAAATTTTCTCCTCAAGCGGCATATCGCTTAGAGCCCG-GTCCCTC 164
AY590142 TC-ACCAGC-CCTAT-TCCCCGGCCCCCGGGGGCTAGCTACACACCA--CTGGCTCAATTTTCTCCTCAAGCGGCCTATCGCTTAGAACCTG-GTCCCTC 176
AF033818 ATGGGAAATTCCCCCTCCTATAACCCCCCGCTGG-TATCTCCCCCTCAGACTGGCTCAACCTTCGTCAAAGCGCGCAAAGGCT-CAATCCGCGACCCCTC 197
NC_001414 ATGGGAAATTCCCCCTCCTATAACCCCCCGCTGG-TATCTCCCCCTCAGACTGGCTCAACCTTCGTCAAAGCGCGCAAAGGCT-CAATCCGCGACCCCTC 197
K02120 ATGGGAAATTCCCCCTCCTATAACCCCCCGCTGG-TATCTCCCCCTCAGACTGGCTCAACCTTCGTCAAAGCGCGCAAAGGCT-CAATCCGCGACCCCTC 197
D00647 ATGGGAAACTCCCCCTCCTATAACCCCCCGCTGG-CATCTCCCCCTCAGACTGGCTCAACCTTCGTCAAAGCGCGCAAAGGCT-CAATCCACGACCCCTC 197
AF257515 ATGGGAAATTCCCCTTCTTATAACCTCCCGCTGG-TATCTCCCCCTCAGACTGGCTCAACCTTCGTCAAAGCGCGCAAAGGCT-CAATCCGCGACCCCTC 197
ruler .....110.....120.....130.....140.....150.....160.....170.....180.....190.....200

```

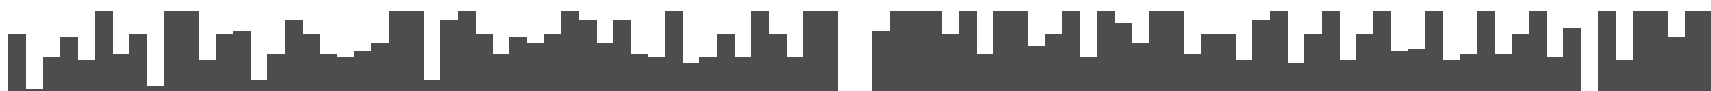

```

      **  **  *  *  *          *          *          *  **  *  **  *  *  *
M10060 CGATTTGACTTCCAGCAGCTACGACGCTTTCTAAAACTAGCCCT-TAAAAAGCCCATTTGGCTAAATCCTATTGACTACTCGCTTTTAG----CTAGCC 256
NC_001488 CGATTTGACTTCCAGCAGCTACGACGCTTTCTAAAACTAGCCCT-TAAAAAGCCCATTTGGCTAAATCCTATTGACTACTCGCTTTTAG----CTAGCC 256
AF412314 CGATTTGACTTCCAGCAGCTACGACGCTTTCTAAAACTAGCCCT-TAAAAAGCCCATTTGGCTAAATCCTATTGGCTACTCGCTTTTAG----CTAGCC 256
AF139382 CGATTTGACTTTTCCAGCAGCTACGACGCTTTCTGAAATTAGCCCT-TAAAAAGCCCATTTGGCTAAATCCTATTGACTACTCGCTTTTAG----CTAGCC 256
AF326584 CGATTTGACTTCCAGCAGCTACGACGCTTTCTGAAATTAGCCCT-TAAAAAGCCCATTTGGCTAAATCCTATTGACTACTCGCTTTTAG----CTAGCC 256
AF326583 CGATTTGACTTCCAGCAGCTACGACGCTTTCTGAAATTAGCCCT-TAAAAAGCCCATTTGGCTAAATCCTATTGACTACTCGCTTTTAG----CTAGCC 256
L20734 CGATTTGACTTCCAACAGCTACGACGCTTTCTTAAACTGGCCCT-TAAAAAGCCCATTTGGCTAAATCCTATCGACTACTCGCTTTTAG----CTAGCC 256
Y13051 CGATTTGACTTCCAACAGCTACGACGCTTTCTTAAACTAGCCCT-TAAAAAGCCCATTTGGCTAAATCCTATCGACTACTCGCTTTTAG----CTAGCC 256
L11456 CGATTTGACTTCCAACAGCTACGACGCTTTCTTAAACTAGCCCT-TAAAAAGCCCATTTGGCTAAATCCTATTGACTACTCGCTTTTAG----CTAGCC 256
X89270 CGATTTGACTTCCAACAGCTACGACGCTTTCTTAAACTGGCCCT-TAAAAAGCCCATTTGGCTAAATCCTATCGACTACTCGCTTTTAG----CTAGCC 256
AF074965 CGGTTTCGACTTCCAACAGCTACGACGCTTTCTTAAACTATCTCT-TAAAAAGCCCATTTGGCTAAATCCTATTGACTACTCGCTTTTAG----CTAGCC 256
Y14365 CGACTTCGACTTCCAGCAACTACGACGCTTTCTAAAACTAGCACT-TAAAAAGCCCATTTGGCTAAATCCTATTGACTACTCGCTTTTAG----CTAGCC 256
Y14570 CGACTTTGATTTTCCAGCAACTACGGCGTTTCTGAAAGCTGGCTCT-TAAAAAGCCCATTTGGCTAAATCCTATTGACTACTCGCTTTTAG----CTAGCC 256
NC_001815 CGACTTTGATTTTCCAGCAACTACGGCGTTTCTGAAAGCTGGCTCT-TAAAAAGCCCATTTGGCTAAATCCTATTGACTACTCGCTTTTAG----CTAGCC 256
U90557 CGACTTTGATTTTCCAGCAACTACGGCGTTTCTGAAAGCTAGCTCT-TAAAAAGCCCATTTGGCTAAATCCTATTGACTACTCGCTTTTAG----CTAGCC 257
Y07616 GGAATTTGATTTCCATCAGTTACGAAAATTTCTTAAAAATTAGCCAT-CAAGACCCCGGTATGGTTAAACCCCATCAATTACTCCGTCTCG----CTGGGC 272
AY217650 GGAATTTGATTTCCATCAGTTACGAAAATTTCTTAAAAATTGGCCAT-CAAGACCCCGGTATGGTTAAACCCCATCAATTACTCTGTCTCG----CTGGGC 272
AF517775 TGAATTTGATTTCCACCAGTTGCGAAAAGTTCCCTAAAAGCTAGCTAT-TAAAAAGCCCATTTGGCTAAATCCTATTGACTACTCGCTTTTAG----CTAGCC 271
AY22339 TGAATTTGATTTCCACCAGTTGCGAAAAGTTCCCTAAAAGCTAGCTAT-TAAAAAGCCCATTTGGCTAAATCCTATTGACTACTCGCTTTTAG----CTAGCC 271
NC_003323 TGAATTTGATTTCCATCAGTTACGAAAATTTCTTAAAAATTAGCCAT-CAAGACCCCGGTATGGTTAAATCCTATTGACTACTCGCTTTTAG----CTAGCC 272
L36905 CAGTTACGATTTCCACCAGTTAAAAAATTTCTTAAAAATAGCTTT-AGAAAACCCGGTCTGGATCTGTCCCATTAACTACTCCCTCCTAG----CCAGCC 259
AF139170 CAGTTACGATTTCCACCAGTTAAAAAATTTCTTAAAAATAGCTTT-AGAAAACCCGGTCTGGATCTGTCCCATTAACTACTCCCTCCTAG----CCAGCC 259
AF042071 CAGTTACGATTTCCACCAGTTAAAAAATTTCTTAAAAATAGCTTT-AGAAAACCCGGTCTGGATCTGTCCCATTAACTACTCCCTCCTAG----CCAGCC 259
L03561 CAGTTACGATTTCCACCAGTTGAAAAAATTTCTTAAAAATAGCTTT-AGAAAACCCGGTCTGGATCTGTCCCATTAACTACTCCCTCCTAG----CCAGCC 259
AF259264 CAGTTACGATTTCCACCAGTTGAAAAAATTTCTTAAAAATAGCTTT-AGAAAACCCGGTCTGGATCTGTCCCATTAACTACTCCCTCCTAG----CCAGCC 259
AY563953 CAGTTACGATTTCCACCAGTTAAAAAATTTCTTAAAAATAGCTTT-AGAAAACCCGGTCTGGATCTGTCCCATTAACTACTCCCTCCTAG----CCAGCC 259
AY563954 CAGTTACGATTTCCACCAGTTAAAAAATTTCTTAAAAATAGCTTT-AGAAAACCCGGTCTGGATCTGTCCCATTAACTACTCCCTCCTAG----CCAGCC 259
U19949 CAGTTACGATTTCCACCAGTTAAAAAATTTCTTAAAAATAGCTTT-AGAAAACCCGGTCTGGATCTGTCCCATTAACTACTCCCTCCTAG----CCAGCC 259
J02029 CAGTTACGATTTCCACCAGTTAAAAAATTTCTTAAAAATAGCTTT-AGAAAACCCGGTCTGGATCTGTCCCATTAACTACTCCCTCCTAG----CCAGCC 259
D13748 CAGTTACGATTTCCACCAGTTAAAAAATTTCTTAAAAATAGCTTT-AGAAAACCCGGTCTGGATCTGTCCCATTAACTACTCCCTCCTAG----CCAGCC 259
AF033817 CAGTTACGATTTCCACCAGTTAAAAAATTTCTTAAAAATAGCTTT-AGAAAACCCGGTCTGGATCTGTCCCATTAACTACTCCCTCCTAG----CCAGCC 259
NC_001436 CAGTTACGATTTCCACCAGTTAAAAAATTTCTTAAAAATAGCTTT-AGAAAACCCGGTCTGGATCTGTCCCATTAACTACTCCCTCCTAG----CCAGCC 259
AF074966 CAGTTACGATTTCCACCAGTTAAAAAATTTCTTAAAAATGGCTTT-AGAAAACCCGGTCTGGATCTGTCCCATTAACTACTCCCGCCTAG----CCAGCC 259
NC_000858 CAGTTACGATTTCCACCAGTTAAAAAATTTCTTAAAAATGGCTTT-AGAAAACCCGGTCTGGATCTGTCCCATTAACTACTCCCGCCTAG----CCAGCC 259
L02534 CAGTTACGATTTTCCATCAGTTAAAAACAGTTCTTAAAAATGGCCCT-AGAAAACCCAGTCTGGATGTGTCCCATTAACTACTCCCTCCTAG----CTAGTC 263
Z46900 CAGTTACGATTTCCATCAGTTAAAGCAGTTTCTTAAAAATGGCCCT-AGAGACGCCAGTCTGGATGTGTCCCATTGACTACTCCCTCCTAG----CTAGTC 259
AY590142 CAGCTACGACTTTCACCAGCTCAGACAATTCCTTAAACTAGCTTT-AGAAAACCCCTGTCTGGATGAGCCCTATTAATTATTCCCTCCTGG----CGAATC 271
AF033818 TCCTAGCGATTTT-ACCGATTTAAAAAATTACATCCATTGGTTTCATAAGACCCAGA-----AAAAACCATGGACT-TTCACTTCTGGTGGCCCCGCC 288
NC_001414 TCCTAGCGATTTT-ACCGATTTAAAAAATTACATCCATTGGTTTCATAAGACCCAGA-----AAAAACCATGGACT-TTCACTTCTGGTGGCCCCGCC 288
K02120 TCCTAGCGATTTT-ACCGATTTAAAAAATTACATCCATTGGTTTCATAAGACCCAGA-----AAAAACCATGGACT-TTCACTTCTGGTGGCCCCGCC 288
D00647 CCCCAGCGATTTT-ACCGATTTAAAAAATTACATCCATTGGTTTCATAAGACCCAGA-----AAAAACCATGGACT-TTCACTTCTGGTGGCCCCGCC 288
AF257515 TCCTAGCGATTTT-ACCGATTTAAAAAATTACATCCATTGGTTTATAAGACCCAGA-----AAAAACCATGGACT-TTCACTTCTGGTAGCCCCACC 288
ruler .....210.....220.....230.....240.....250.....260.....270.....280.....290.....300

```

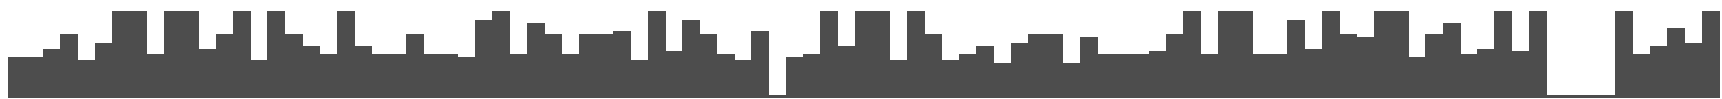



```

* * * *
M10060 ACACCTATCTG-----CCC-TACT-ACTACTCCTCCGCCACC-----TCCCCCCCCTTCCCCGGAGGCCCATGTTCCCCCCCCTTACGTGGAACCCACCA 439
NC_001488 ACACCTATCTG-----CCC-TACT-ACTACTCCTCCGCCACC-----TCCCCCCCCTTCCCCGGAGGCCCATGTTCCCCCCCCTTACGTGGAACCCACCA 439
AF412314 ACACCTATCTG-----CCC-TACT-ACTACTCCTCCGCCACC-----TCCCCCCCCTTCCCCGGAGGCCCATGTTCCCCCCCCTTACGTGGAACCCACCA 439
AF139382 ACACCTATCTG-----CCC-TACT-ACTACTCCTCCGCCACC-----TCCCCCCCCTTCCCCGGAGGCCCATGTTCCCCCCCCTTACGTGGAACCCACCA 439
AF326584 ACACCTATCTG-----CCC-TACT-ACTACTCCTCCGCCACC-----TCCCCCCCCTTCCCCGGAGGCCCATGTTCCCCCTCCTTACGCGGAACCCACCA 439
AF326583 ACACCTATCTG-----CCC-TACT-ACTACTCCTCCGCCACC-----TGCCCCGCGCCCCAGTATGCACATGCTTCCCCGCCCTACGGCGAACCCACCA 439
L20734 ACACCTATCTG-----CCC-TACC-ACTACCCCTCCGCCACC-----TCCCCCCCCTTCCCCGGAGGCCCATGTTCCCCCCCCTTACGTGGAACCCACTA 439
Y13051 ACACCTATCTG-----CCC-TACC-ACTACCCCTCCGCCACC-----TCCCCCCCCTTCCCCGGAGGCCCATGTCCCCCCCCTTACGTGGAACCCACTA 439
L11456 ACACCTATCTG-----CCC-TACC-ACTACCCCTCCGCCACC-----TCCCCCCCCTTCCCCGGAGGCCCATGTCCCCCCCCATACGTAGAACCACCTA 439
X89270 ACACCTATCTG-----CCC-CACT-ACCACTCCTCCGCCACC-----CCCCCCCCTTCCCCGGAGGCCCATGTTCCCCCCCCTTACGTGGAACCCACCT 439
AF074965 ACTCCTATCTG-----CCC-TACC-A-----GGTA 374
Y14365 ACACCTATCTG-----CCC-GACG-ACTGCTCCTCCGCCACC-----GCCCCCCCCTTCCCCGGAGGGCCATGTCCCCCCCCTTATGCAGAGCCCCTA 439
Y14570 AC-CCGAACCA-----GCTA-ACCCACGCCCCCTCCAACA-----GCCCTCGGCTCCTCCGGAACCCCATACACCCCCCCCCCTATATAAAGCCTCCCG 436
NC_001815 AC-CCGAACCA-----GCTA-ACCCACGCCCCCTCCAACA-----GCCCTCGGCTCCTCCGGAACCCCATACACCCCCCCCCCTATATAAAGCCTCCCG 436
U90557 AC-CCGAACCG-----GCTA-ACCCACGCCCCCTCCAGCA-----GCCCTCGGCTCCTCCGGAACCCCATACGCCCCCCCCCTATATAGAGCCTCCCG 437
Y07616 GC-CCCG-CTA-----GCAG-ATG-ACC-C-----CAAAAGCC--TCCGCCCTATCCTGA-ACAAGTGCAAGCG 415
AY217650 GC-CCCG-CTA-----GCAG-ATG-ACC-C-----TCAAAGCC--TCCACCCTATCCTGA-ACAAGTGCAAAGCG 415
AF517775 GC-CCCA-CCA-----ACAG-ATG-ACC-C-----TCAAAGCC--TCCGCCCTACCCGA-GCAGGCACAGGGG 414
AY22339 GC-CCCG-CCA-----GCAG-ATG-ACC-C-----TCAAAGCC--TCCGCCCTACCCGA-GCAGGCACAGGGG 414
NC_003323 GC-CCCA-CCA-----GCAG-ATG-ACC-C-----TCAAAGCC--TCCACCCTACCCGA-GCATGCACAGGTA 415
L36905 TCATCCC-CCA-----CCC-ACG-ACCCCC-----CGGATTCGGATCCACAAATCCCCCCTCCCTATGTTGAACCTACGG 424
AF139170 TCATCCC-CCA-----CCC-ACG-ACCCCC-----CGGATTCGATCCACAAATCCCCCCTCCCTATGTTGAGCCTACGG 424
AF042071 TCATCCC-CCA-----CCC-ACG-ACCCCC-----CGGATTCGATCCACAAATCCCCCCTCCCTATGTTGAGCCTACGG 424
L03561 TCATCCC-CCA-----CCC-ACG-ACCCCC-----CGGATTCGATCCACAAATCCCCCCTCCCTATGTTGAGCCTACGG 424
AF259264 TCATCCC-CCA-----CCC-ACG-ACCCCC-----CGGATTCGATCCACAAATCCCCCCTCCCTATGTTGAGCCTACGG 424
AY563953 TCATCCC-CCA-----CCC-ACG-ACCCCC-----CGGATTCGATCCACAAATCCCCCCTCCCTATGTTGAGCCTACGG 424
AY563954 TCATCCC-CCA-----CCC-ACG-ACCCCC-----CGGATTCGATCCACAAATCCCCCCTCCCTATGTTGAGCCTACGG 424
U19949 TCATCCC-CCA-----CCC-ACG-ACCCCC-----CAGATTCGATCCACAAATCCCCCCTCCCTATGTTGAGCCTACGG 424
J02029 TCATCCC-CCA-----CCC-ACG-ACCCCC-----CGGATTCGATCCACAAATCCCCCCTCCCTATGTTGAGCCTACGG 424
D13748 TCATCCT-CCA-----CCC-ACG-ACCCCC-----CGGATTCGATCCACAAATCCCCCCTCCCTATGTTGAGCCTACAG 424
AF033817 TCATCCT-CCA-----CCC-ACG-ACCCCC-----CGGATTCGATCCACAAATCCCCCCTCCCTATGTTGAGCCTACAG 424
NC_001436 TCATCCT-CCA-----CCC-ACG-ACCCCC-----CGGATTCGATCCACAAATCCCCCCTCCCTATGTTGAGCCTACAG 424
AF074966 TCATCCC-CCA-----CTC-TCG-ACCCCC-----CGGATTCGATCCACAAATCCCCCCTCCTTATGTTGAGCCTACGG 424
NC_000858 TCATCCC-CCA-----CTC-TCG-ACCCCC-----CGGATTCGATCCACAAATCCCCCCTCCTTATGTTGAGCCTACGG 424
L02534 TCATCCC-CCA-----CCC-ACG-ACCCCC-----CAGATTCGATCCACAGATCCCCCCTCCCTATGTTGAGCCTACAG 428
Z46900 TCACCTC-CCA-----CCC-ACA-GCCCC-----CAGATTCGGATCCGCAAATCCCCCCTCCCTACATTGAGCCTACGG 423
AY590142 GCCTCTC-CCAACACTGCCC-CCA-GCTCCCAGTTTCCCGCTGAAACTAGTCTAATGCGCTCTGACCTCCACATCCCACCCCCCTATGCGGAGCCCTCTG 466
AF033818 GCATCAGCC-----CCAGAAGAACA-----ACCCCCCCTTATG-----A 410
NC_001414 GCATCAGCC-----CCAGAAGAACA-----ACCCCCCCTTATG-----A 410
K02120 GCATCGGCC-----CCAGAAGAACA-----ACCCCCCCTTATG-----A 410
D00647 GCATCGGCC-----CCAGAAGAACA-----ACCCCCCCTTATG-----A 410
AF257515 GCATCGGCC-----CCAGAAGAACA-----ACCCCCCCTTATG-----A 410
ruler .....410.....420.....430.....440.....450.....460.....470.....480.....490.....500

```

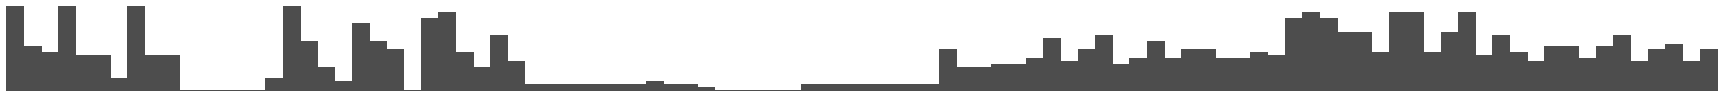

\*    \*\*    \*    \*    \*    \*    \*    \*    \*    \*\*    \*    \*    \*\*\*    \*    \*\*    \*    \*    \*    \*\*    \*\*    \*    \*\*    \*

|           |                                                                                                        |     |
|-----------|--------------------------------------------------------------------------------------------------------|-----|
| M10060    | CCACG-CAATGCTTC-CCTATCTTACATCCCCAGGAGCCCCTCAGCTCATAGGCCCTGGCAGATGAAAAGACTTACAGGCC-ATCAAGCAGGAGGTCAG    | 536 |
| NC_001488 | CCACG-CAATGCTTC-CCTATCTTACATCCCCAGGAGCCCCTCAGCTCATAGGCCCTGGCAGATGAAAAGACTTACAGGCC-ATCAAGCAGGAGGTCAG    | 536 |
| AF412314  | CCACG-CAATGCTTC-CCTATCTTACATCCCCAGGAGCCCCTCAGCTCATAGGCCCTGGCAGATGAAAAGACTTACAGGCC-ATCAAGCAGGAGGTCAG    | 536 |
| AF139382  | CCACG-CAATGCTTC-CCTATCTTACATCCCCAGGAGCCCCTCAGCTCACAGGCCCTGGCAGATGAAAAGACTTACAGGCC-ATCAAGCAGGAGGTCAG    | 536 |
| AF326584  | CCACG-CAATGCTTC-CCTATCTTACATCCCCAGGAGCCCCTCAGCTCACAGGCCCTGGCAGATGAAAAGACTTACAGGCC-ATCAAGCAGGAGGTCAG    | 536 |
| AF326583  | CCACG-CAATGCTTC-CCTATCTTACATCCCCAGGAGCCCCTCAGCTCACAGGCCCTGGCAGATGAAAAGACTTACAGGCC-ATCAAGCAGGAGGTCAG    | 536 |
| L20734    | CCACA-CAATGCTTT-CCTATCTTACATCCCCCTGGAGCCCCTCAGCTCACAGGCCCTGGCAGATGAAAAGACTTACAGGCC-ATCAAGCAGGAGGTCAG   | 536 |
| Y13051    | CCACA-CAATGCTTT-CCTATCTTACATCCCCCTGGAGCCCCTCAGCTCACAGGCCCTGGCAGATGAAAAGACTTACAGGCC-ATCAAGCAGGAGGTCAG   | 536 |
| L11456    | CCACA-CAATGCTTT-CCTATCTTACATCCCCCTGGAGCCCCTCAGCTCACAGGCCCTGGCAGATGAAAAGACTTACAGGCC-ATCAAGCAGGAGGTCAG   | 536 |
| X89270    | CCACG-AAATGCTTT-CCTATCTTACATCCCCCTGGAGCCCCTCAGCTCATAGGCCCTGGCAGATGAAAAGACTTACAGGCC-ATCAAGCAGGAGGTCAG   | 536 |
| AF074965  | CCACG-CAATGCTTT-CCTATCTTACATCCCCCTGGAGCCCCTCAGATCACAGGCCCTGGCAGATGAAAAGACTTACAGGCC-ATCAAGCAGGAGGTCAG   | 471 |
| Y14365    | CCACA-CAATGCTTT-CCCATAATTACATCCCCCTGGGGCCCCTCAGCTCACAGGCCCTGGCAAATGAAAAGACTTACAAGCC-ATCAAAACAGGAGGTCAG | 536 |
| Y14570    | CTACC-CATTGCCTT-CCCATACTACACCCACATGGGGCCCCTCGGCTCACAGCCCTTGGCAAATGAAAAGACTGCAGGCC-ATCAAGCAGGAGGTCAG    | 533 |
| NC_001815 | CTACC-CATTGCCTT-CCCATACTACACCCACATGGGGCCCCTCGGCTCACAGCCCTTGGCAAATGAAAAGACTGCAGGCC-ATCAAGCAGGAGGTCAG    | 533 |
| U90557    | CTACC-CATTGCCTT-CCCATACTACATCCACATGGGGTCCCTCGGCTCACAGGCCATGGCAAATGAAAAGACTGCAGGCC-ATCAAAACAGGAGGTCAG   | 534 |
| Y07616    | GCACCTCAGTGCCTC-CCTGTCTTACACCCCATGGGGCCCAGCCGCTCATCGCCCTTGGCAGATGAAAAGATCTCCAGGCT-ATCAAGCAGGATGTCAG    | 513 |
| AY217650  | GCACCTCAGTGCCTC-CCTGTCTTACACCCCATGGGGCCCAGCCGCTCATCGCCCTTGGCAGATGAAAAGATCTCCAGGCT-ATCAAAACAGGAAGTCAG   | 513 |
| AF517775  | GCACCTCAGTGCCTC-CCTGTCTTCCACCCACAGGGGCCCCAGCCGCCCATCGCCCTTGGCAAATGAAAAGATCTCCAAGCT-ATTAACAGGAAGTCAG    | 512 |
| AY22339   | ACATCCCAGTGCCTC-CCTGTCTTACACCCCATGGGGCCCAGCCGCTTCCATCGCCCTTGGCAAATGAAAAGATCTCCAAGCT-ATTAACAGGAAGTCAG   | 512 |
| NC_003323 | GAACCTCAGTGCCTC-CCTGTCTTACACCCCATGGGGCCCAGCCACTCCCGCCCTGGCAAATGAAAAGATCTCCAAGCT-ATCAAGCAGGAAGTTAG      | 513 |
| L36905    | CCCCC-CAAGTCCTT-CCAGTCATGCACCCACATGGTGCCCTCCCAACCACCGCCCATGGCAAATGAAAAGACTACAGGCC-ATTAAGCAAGAAGTC--    | 519 |
| AF139170  | CCCCC-CAAGTCCTT-CCAGTCATGCACCCACATGGTGCCCTCCCAACCACCGCCCATGGCAAATGAAAAGACTACAGGCC-ATTAAGCAAGAAGTC--    | 519 |
| AF042071  | CCCCC-CAAGTCCTT-CCAGTCATGCACCCACATGGTGCCCTCCCAACCACCGCCCATGGCAAATGAAAAGACTACAGGCC-ATTAAGCAAGAAGTC--    | 519 |
| L03561    | CCCCC-CAAGTCCTT-CCAGTCATGCACCCACATGGTGCCCTCCCAACCACCGCCCATGGCAAATGAAAAGACTACAGGCC-ATTAAGCAAGAAGTC--    | 519 |
| AF259264  | CCCCC-CAAGTCCTT-CCAGTCATGCACCCACATGGTGCCCTCCCAACCACCGCCCATGGCAAATGAAAAGACTACAGGCC-ATTAAGCAAGAAGTC--    | 519 |
| AY563953  | CCCCC-CAAGTCCTT-CCAGTCATGCACCCACATGGTGCCCTCCCAACCACCGCCCATGGCAAATGAAAAGACTACAGGCC-ATTAAGCAAGAAGTC--    | 519 |
| AY563954  | CCCCC-CAAGTCCTT-CCAGTCATGCACCCACATGGTGCCCTCCCAACCACCGCCCATGGCAAATGAAAAGACTACAGGCC-ATTAAGCAAGAAGTC--    | 519 |
| U19949    | CCCCC-CAAGTCCTT-CCAGTCATGCACCCACATGGTGCCCTCCCAACCACCGCCCATGGCAAATGAAAAGACTACAGGCC-ATTAAGCAAGAAGTC--    | 519 |
| J02029    | CCCCC-CAAGTCCTT-CCAGTCATGCACCCACATGGTGCCCTCCCAACCACCGCCCATGGCAAATGAAAAGACTACAGGCC-ATTAAGCAAGAAGTC--    | 519 |
| D13748    | CCCCC-CAAGTCCTT-CCAGTCATGCACCCACATGGTGCCCTCCCAACCACCGCCCATGGCAAATGAAAAGACTACAGGCC-ATTAAGCAAGAAGTC--    | 519 |
| AF033817  | CCCCC-CAAGTCCTT-CCAGTCATGCACCCACATGGTGCCCTCCCAACCACCGCCCATGGCAAATGAAAAGACTACAGGCC-ATTAAGCAAGAAGTC--    | 519 |
| NC_001436 | CCCCC-CAAGTCCTT-CCAGTCATGCACCCACATGGTGCCCTCCCAACCACCGCCCATGGCAAATGAAAAGACTACAGGCC-ATTAAGCAAGAAGTC--    | 519 |
| AF074966  | CCCCT-CAAGTCCTT-CCAGTCATGCATCCACATGGGGTCTCTCCAGCCATCGCCCATGGCAAATGAAAAGACTACAGGCC-ATTAAGCAAGAAGTC--    | 519 |
| NC_000858 | CCCCT-CAAGTCCTT-CCAGTCATGCATCCACATGGGGTCTCTCCAGCCATCGCCCATGGCAAATGAAAAGACTACAGGCC-ATTAAGCAAGAAGTC--    | 519 |
| L02534    | CCCCC-CAAGTCCTT-CCAGTCATGCACCCACACGGTGTCCCTCCCACGCACCGCCCGTGGCAAATGAAAAGACTACAGGCC-ATTAAGCAGGAAGTC--   | 524 |
| Z46900    | CCCCC-CAGGTCCTT-CCAGTCATGCACCCGCATGGTGCCCTCCTAGCCACCGTCCATGGCAAATGAAAAGACTACAGGCC-ATTAACAGGAGGTC--     | 518 |
| AY590142  | CTCCC-CAAGTCCTC-CCAGTTGTACACCCACAGGGGCCCCGCCAACCCCGCCCTTGGCAGATGAAAAGACTCCAAGCC-ATAAAGCAGGAGGTA--      | 561 |
| AF033818  | CCCCCCCGCCATTTTGCCAATTAT--ATCTGAAGGAAATCGCAACCG--CCATCGCGCTTGGGCACCTCCGAGAATTACAAGAT-ATTAAGCAAGAAGTGA  | 506 |
| NC_001414 | CCCCCCCGCCATTTTGCCAATTAT--ATCTGAAGGAAATCGCAACCG--CCATCGCGCTTGGGCACCTCCGAGAATTACAAGAT-ATTAAGCAAGAAGTGA  | 506 |
| K02120    | CCCCCCCGCCATTTTGCCAATTAT--ATCTGAAGGAAATCGCAACCG--CCATCGTGCTTGGGCACCTCCGAGAATTACAAGAT-ATCAAGCAAGAAGTGA  | 506 |
| D00647    | CCCTCCCGCTGTTTTACCAATCAT--ATCTGAAGGAAATCGCAACCG--CCACCGCGCTTGGGCACCTCCGAGAATTACAAGAT-ATTAAGCAAGAAGTGA  | 506 |
| AF257515  | CCCCCCCCTGTTTTGCCAATCAT--ATCTGAAGGAAATCGTAACCG--CCATCGCGCTTGGGCACCTCCGAGAAGTACAAGAT-ATCAAGCAAGAAGTGA   | 506 |

ruler    .....510.....520.....530.....540.....550.....560.....570.....580.....590.....600

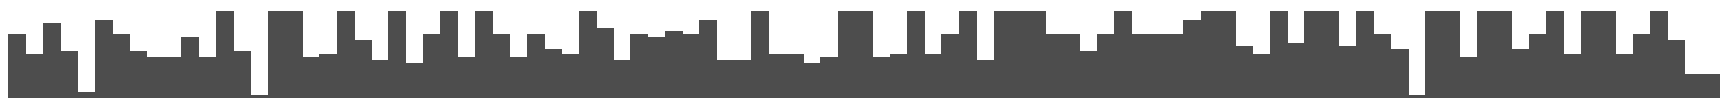



\*\* \* \*\* \* \* \* \* \*\* \*\* \* \* \* \* \*\* \*\* \* \* \* \* \* \*\* \*\* \* \* \* \* \* \*\* \* \* \* \* \*  
 M10060 CTCCT---CTGCTCTTGGCAGCCCCAGTTC--ATGCAGACCCGCCGGCTGGCGGTACAACAGTTTGACCCCAACCGCCAAGGACTTACAAGATCTCCTCC 631  
 NC\_001488 CTCCT---CTGCTCTTGGCAGCCCCAGTTC--ATGCAGACCCGCCGGCTGGCGGTACAACAGTTTGACCCCAACCGCCAAGGACTTACAAGATCTCCTCC 631  
 AF412314 CTCCT---CTGCTCCGGGCAGCCCCAGTTC--ATGCAGACCCGCCGGCTGGCGGTACAACAGTTTGACCCCAACCGCCAAGGACTTACAAGATCTCCTCC 631  
 AF139382 CTCCT---CTGCTCCTGGCAGCCCCAGTTC--ATGCAGACCCGCCGGCTGGCGGTACAACAGTTTGACCCCAACCGCCAAGGACTTACAAGATCTCCTCC 631  
 AF326584 CTCCT---CTGCTCCTGGCAGCCCCAGTTC--ATGCAGACCCGCCGGCTGGCGGTACAACAGTTTGACCCCAACCGCCAAGGACTTACAAGATCTCCTCC 631  
 AF326583 CTCCT---CTGCTCCTGGCAGCCCCAGTTC--ATGCAGACCCGCCGGCTGGCGGTACAACAGTTTGACCCCAACCGCCAAGGACTTACAAGATCTCCTCC 631  
 L20734 CTCCT---CTGCCCTGGCAGCCCCAGTTC--ATGCAGACCCGCCGGCTGGCGGTACAACAGTTTGACCCCAACCGCCAAGGACTTACAAGATCTCCTCC 631  
 Y13051 CTCCT---CTGCCCTGGCAGCCCCAGTTC--ATGCAGACCCGCCGGCTGGCGGTACAACAGTTTGACCCCAACCGCCAAGGACTTACAAGATCTCCTCC 631  
 L11456 CTCCT---CTGCCCTGGCAGCCCCAGTTC--ATGCAGACCCGCCGGCTGGCGGTACAACAGTTTGACCCCAACCGCCAAGGACTTACAAGATCTCCTCC 631  
 X89270 CTCCT---CTGCCCTGGCAGCCCCAGTTC--ATGCAGACCCGCCGGCTGGCGGTACAACAGTTTGACCCCAACCGCCAAGGACTTACAAGATCTCCTCC 631  
 AF074965 CTCCT---CTGCCCTGGCAGCCCCAGTTC--ATGCAGACCCGCCGGCTGGCGGTACAACAGTTTGACCCCAACCGCCAAGGACTTACAAGATCTCCTCC 566  
 Y14365 CTCCT---CTGCCCTGGCAGCCCCAATTC--ATGCAGACCCGCCGGCTGGCGGTACAACAGTTTGACCCCAACCGCCAAGGATTTGCAAGATCTCCTCC 631  
 Y14570 CACCT---CAGCCCCGGGAGTCCCCAGTTC--ATGCAAACAGTCCGGCTCGCAATTGAGCAATTCGACCCCAACCGCCAAGGACTTACAAGATCTCCTGC 628  
 NC\_001815 CACCT---CAGCCCCGGGAGTCCCCAGTTC--ATGCAAACAGTCCGGCTCGCAATTGAGCAATTCGACCCCAACCGCCAAGGACTTACAAGATCTCCTGC 628  
 U90557 TACCT---CGGCCCTGGGAGTCCCCAGTTC--ATGCAAACAGTCCGGCTCGCAATTGAGCAATTCGACCCCAACCGCCAAGGACTTACAAGATCTCCTGC 629  
 Y07616 CTCTT---CCGCCCTGGCAGCCTCCAATTC--ATGCAGACTGTCCGGCTAGCTGTTCAACAATTTGACCCCAACCGCAAAGATCTTCACGACCTCCTAC 608  
 AY217650 CTCTT---CCGCCCAGGCAGCCCCAATTC--ATGCAGACTGTCCGGCTAGCCGTTGAGCAATTTGACCCCAACCGCAAAGATCTTCACGACCTCCTAC 608  
 AF517775 CTCTT---CCGCCCTGGTAGCCCCAGTTC--ATGCAGACTGTCCGGCTTAGCTGTCCAGCAATTTGACCCCAACCGCAAAGGATCTCCAGATCTCCTAC 607  
 AY222339 CTCTT---CCGCCCTGGTAGCCCCAGTTC--ATGCAGACTGTCCGGCTTAGCTGTCCAGCAATTTGACCCCAACCGCAAAGATCTTCACGATCTCCTAC 607  
 NC\_003323 TTCTT---CCGCCCTGGCAGCCCCAGTTC--ATGCAGACCCGTCCGGCTAGCTGTCCAGCAATTTGACCCCAACCGCAAAGATCTCCATGATCTCCTAC 608  
 L36905 -TCCCAAGCAGCCCCTGGGAGCCCCAGTTT--ATGCAGACCATCCGGCTTGCAGTGCAGCAGTTTGACCCCAACCGCAAAGACCTCCAAGACCTCCTGC 616  
 AF139170 -TCCCAAGCAGCCCCTGGGAGCCCCAGTTT--ATGCAGACCATCCGGCTTGCAGTGCAGCAGTTTGACCCCAACCGCAAAGACCTCCAAGACCTCCTGC 616  
 AF042071 -TCCCAAGCAGCCCCTGGGAGCCCCAGTTT--ATGCAGACCATCCGGCTTGCAGTGCAGCAGTTTGACCCCAACCGCAAAGACCTCCAAGACCTCCTGC 616  
 L03561 -TCCCAAGCAGCCCCTGGGAGCCCCAGTTT--ATGCAGACCATCCGGCTTGCAGTGCAGCAGTTTGACCCCAACCGCAAAGACCTCCAAGACCTCCTGC 616  
 AF259264 -TCCCAAGCAGCCCCTGGGAGCCCCAGTTT--ATGCAGACCATCCGGCTTGCAGTGCAGCAGTTTGACCCCAACCGCAAAGACCTCCAAGACCTCCTGC 616  
 AY563953 -TCCCAAGCAGCCCCTGGGAGCCCCAGTTT--ATGCAGACCATCCGGCTTGCAGTGCAGCAGTTTGACCCCAACCGCAAAGACCTCCAAGACCTCCTGC 616  
 AY563954 -TCCCAAGCAGCCCCTGGGAGCCCCAGTTT--ATGCAGACCATCCGGCTTGCAGTGCAGCAGTTTGACCCCAACCGCAAAGACCTCCAAGACCTCCTGC 616  
 U19949 -TCCCAAGCAGCCCCTGGGAGCCCCAGTTT--ATGCAGACCATCCGGCTTGCAGTGCAGCAGTTTGACCCCAACCGCAAAGACCTCCAAGACCTCCTGC 616  
 J02029 -TCCCAAGCAGCCCCTGGGAGCCCCAGTTT--ATGCAGACCATCCGGCTTGCAGTGCAGCAGTTTGACCCCAACCGCAAAGACCTCCAAGACCTCCTGC 616  
 D13748 -TCCCAAGCGGCCCTGGAAGCCCCAGTTT--ATGCAGACCATCCGGCTTGCAGTGCAGCAGTTTGACCCCAACCGCAAAGACCTCCAAGACCTCCTGC 616  
 AF033817 -TCCCAAGCGGCCCTGGAAGCCCCAGTTT--ATGCAGACCATCCGGCTTGCAGTGCAGCAGTTTGACCCCAACCGCAAAGACCTCCAAGACCTCCTGC 616  
 NC\_001436 -TCCCAAGCGGCCCTGGAAGCCCCAGTTT--ATGCAGACCATCCGGCTTGCAGTGCAGCAGTTTGACCCCAACCGCAAAGACCTCCAAGACCTCCTGC 616  
 AF074966 -TCCCAAGCAGCCCCGGGAGCCCCAGTTT--ATGCAGACCATCCGGCTTGCAGTGCAGCAGTTTGACCCCAACCGCAAAGACCTCCAAGACCTCCTGC 616  
 NC\_000858 -TCCCAAGCAGCCCCGGGAGCCCCAGTTT--ATGCAGACCATCCGGCTTGCAGTGCAGCAGTTTGACCCCAACCGCAAAGACCTCCAAGACCTCCTGC 616  
 L02534 -TCCCAAGCAGCCCCGGGAGCCCCAGTTT--ATGCAGACCATCCGGCTTGCAGTGCAGCAGTTTGACCCCAACCGCAAAGACCTCCAAGACCTCCTGC 621  
 Z46900 -TCCCAAGCAGCCCCTGGGAGCCCCAGTTT--ATGCAAACCTGTGAGGCTTGCAGTGCAGCAGTTTGACCCCAACCGCAAAGACCTCCAAGACCTCCTGC 615  
 AY590142 -TCCCAAGCCGCTCCGGGAAGCCCCAGTTC--ATGCAAACCGTTAGGCTAGCGGTACAACAATTCGATCCCCTGACCCCAAGGATCTGCAGGATCTCCTGC 658  
 AF033818 AAATAA---GGCACC GGGT---TCGCAAGTATGGATACAAACACTACGACTTGCAATCTTACAGGCCGACCCCTACTCCTGCTGACCTAGAACAACCTTTGCC 601  
 NC\_001414 AAATAA---GGCACC GGGT---TCGCAAGTATGGATACAAACACTACGACTTGCAATCTTACAGGCCGACCCCTACTCCTGCTGACCTAGAACAACCTTTGCC 601  
 K02120 AAATAA---GGCACC GGGT---TCGCAAGTATGGATACAAACACTACGACTTGCAATCTTACAGGCCGACCCCTACTCCTGCTGACCTAGAACAACCTTTGCC 601  
 D00647 AAATAA---GGCACC GGGG---TCGCAAGTATGGATACAAACGCTACGACTTGCAATCTTGCAGGCCGACCCCTACCCCTGCTGACCTAGAACAGCTTTGCC 601  
 AF257515 AAATAA---GGCACC GGGT---TCGCAAGTATGGATACAAACACTACGACTTGCAATCTTGCAGGCCGACCCCTACTCCTGCTGACCTAGAACAACCTTTGCC 601

ruler .....610.....620.....630.....640.....650.....660.....670.....680.....690.....700

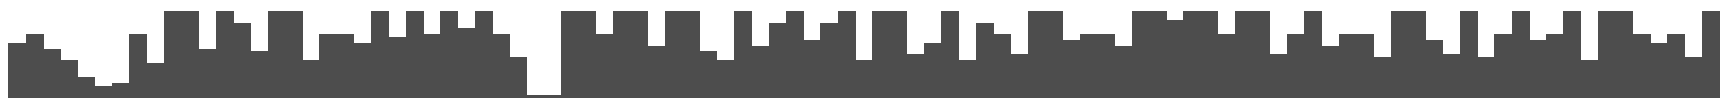

|           |                                                                                                       |       |       |                                                   |     |       |                 |     |   |   |   |   |    |   |       |   |       |   |
|-----------|-------------------------------------------------------------------------------------------------------|-------|-------|---------------------------------------------------|-----|-------|-----------------|-----|---|---|---|---|----|---|-------|---|-------|---|
|           | * * *                                                                                                 | * * * | * * * | * * *                                             | *   | *     | *               | *   | * | * | * | * | ** | * | * * * | * | * * * | * |
| M10060    | AGTACCTATGCTCCTCCCTCGTAGTTT                                                                           | ---   | C---  | CTTACACCATCAGCAGCTTAACACACTAATTACCGAGGCTGAGAC     | --- | CCGC  | GGGATGACAGGCTAC | 723 |   |   |   |   |    |   |       |   |       |   |
| NC_001488 | AGTACCTATGCTCCTCCCTCGTAGTTT                                                                           | ---   | C---  | CTTACACCATCAGCAGCTTAACACACTAATTACCGAGGCTGAGAC     | --- | CCGC  | GGGATGACAGGCTAC | 723 |   |   |   |   |    |   |       |   |       |   |
| AF412314  | AGTACCTATGCTCCTCCCTCGTAGTTT                                                                           | ---   | C---  | CTTACACCATCAGCAGCTTAACACACTAATTACCGAGGCTGAGAC     | --- | CCGC  | GGGATGACAGGCTAC | 723 |   |   |   |   |    |   |       |   |       |   |
| AF139382  | AGTACCTATGCTCCTCCCTCGTAGTTT                                                                           | ---   | C---  | CTTACACCATCAGCAGCTCAACACACTAATTACCGAAGCTGAGAC     | --- | CCGC  | GGGATGACAGGCTAC | 723 |   |   |   |   |    |   |       |   |       |   |
| AF326584  | AGTACCTATGCTCCTCCCTCGTAGTTT                                                                           | ---   | C---  | CTTACACCATCAGCAGCTCAACACACTAATTACCGAGGCTGAGAC     | --- | CCGC  | GGGATGACAGGCTAC | 723 |   |   |   |   |    |   |       |   |       |   |
| AF326583  | AGTACCTATGCTCCTCCCTCGTAGTTT                                                                           | ---   | C---  | CTTACACCATCAGCAGCTCAACACACTAATTACCGAGGCTGAGAC     | --- | CCGC  | GGGATGACAGGCTAC | 723 |   |   |   |   |    |   |       |   |       |   |
| L20734    | AGTACCTATGCTCCTCCCTCGTGGTTT                                                                           | ---   | C---  | CTTACACCATCAGCAGCTCAACACACTAATCACCGAGGCTGAGAC     | --- | TCGC  | GGGGTGACAGGCTAC | 723 |   |   |   |   |    |   |       |   |       |   |
| Y13051    | AGTACCTATGCTCCTCCCTCGTGGTTT                                                                           | ---   | C---  | CTTACACCATCAGCAGCTCAACACACTAATTACCGAGGCTGAGAC     | --- | TCGC  | GGGGTGACAGGCTAC | 723 |   |   |   |   |    |   |       |   |       |   |
| L11456    | AGTACCTGTGCTCCTCCCTCGTGGTTT                                                                           | ---   | C---  | CTTACACCATCAGCAGCTCAACACACTAATCACCGAGGCTGAGAC     | --- | TCGC  | GGGGTGACAGGCTAC | 723 |   |   |   |   |    |   |       |   |       |   |
| X89270    | AGTACCTATGCTCCTCCCTCGTGGTTT                                                                           | ---   | C---  | CTTACACCATCAGCAGCTCAACACACTAATCACCGAGGCTGAGAC     | --- | TCGC  | GGGGTGACAGGCTAC | 723 |   |   |   |   |    |   |       |   |       |   |
| AF074965  | AGTACCTGTGCTCCTCCCTCGTGGTTT                                                                           | ---   | C---  | CTTACACCATCAGCAGCTCAACACACTAATCACCGAGGCTGAGAC     | --- | TCGC  | GGGGTGACAGGCTAC | 658 |   |   |   |   |    |   |       |   |       |   |
| Y14365    | AGTACCTATGCTCCTCTCTCGTGGTCT                                                                           | ---   | C---  | CCTACACCATCAGCAGCTCAACACACTAATCACCGAGGCTGAGAC     | --- | CCGC  | GGGATGGCAGGCTAT | 723 |   |   |   |   |    |   |       |   |       |   |
| Y14570    | AGTACCTCTGCTCCTCCCTAGTCTGTCT                                                                          | ---   | C---  | CCTTACCATCAACAATTCCATACCCTGATTACCGAAGCTGAAAC      | --- | CCGGG | AATGACAGGTTAT   | 720 |   |   |   |   |    |   |       |   |       |   |
| NC_001815 | AGTACCTCTGCTCCTCCCTAGTCTGTCT                                                                          | ---   | C---  | CCTTACCATCAACAATTCCATACCCTGATTACCGAAGCTGAAAC      | --- | CCGGG | AATGACAGGTTAT   | 720 |   |   |   |   |    |   |       |   |       |   |
| U90557    | AGTACCTCTGCTCCTCCCTAGTCTGTCT                                                                          | ---   | C---  | CCTTACCATCAACAATTCCATACCCTAATTACCGAGGCTGAAAC      | --- | CAGGG | AATGACAGGTTAT   | 721 |   |   |   |   |    |   |       |   |       |   |
| Y07616    | AGTACCTATGCTCCTCACTAGTTGCCT                                                                           | ---   | C---  | TTACTTACATCATCAGCAGCTTGAGACCCCTCATAGCTCAGGCAGAAAC | --- | TCAAG | TATAACAGGATAC   | 703 |   |   |   |   |    |   |       |   |       |   |
| AY217650  | AGTACCTATGCTCCTCCCTAGTTGCCT                                                                           | ---   | C---  | CTTACACCATCAGCAGCTTGAGACCCCTCATAGCTCAGGCAGAAAC    | --- | TCAAG | TATAACAGGATAT   | 700 |   |   |   |   |    |   |       |   |       |   |
| AF517775  | AGTACCTATGCTCCTCATTAGTGCCT                                                                            | ---   | C---  | CCTGCACCATCAGCAGCTTGAGACCCCTCATAGCTCAGGCAGAAAC    | --- | CCAAG | TATAACAGGATAT   | 699 |   |   |   |   |    |   |       |   |       |   |
| AY222339  | AGTACCTATGCTCCTCACTAGTTGCCT                                                                           | ---   | C---  | CCTACACCATCAACAATTGAGACCCCTCATAGCCAGGCAGAGAC      | --- | CCAAG | TATAACAGGTTAT   | 699 |   |   |   |   |    |   |       |   |       |   |
| NC_003323 | AGTACTTATGCTCCTCGCTAGTTACCT                                                                           | ---   | C---  | CCTGCACCATCAGCAACTTGAGACTCTCATAGCCAGGCAGAAAC      | --- | CCAAG | TATAACAGGTTAT   | 700 |   |   |   |   |    |   |       |   |       |   |
| L36905    | AGTACCTTTGCTCCTCCCTCGTGGCTT                                                                           | ---   | C---  | CCTCCATCACCAGCAGCTAGATAGCCTTATATCAGAGGCCGAAAC     | --- | CCGAG | GTTATTACAGGTTAT | 708 |   |   |   |   |    |   |       |   |       |   |
| AF139170  | AGTACCTTTGCTCCTCCCTCGTGGCTT                                                                           | ---   | C---  | CCTCCATCACCAGCAGCTAGATAGCCTTATATCAGAGGCCGAAAC     | --- | CCGAG | GTTATTACAGGTTAT | 708 |   |   |   |   |    |   |       |   |       |   |
| AF042071  | AGTACCTTTGCTCCTCCCTCGTGGCTT                                                                           | ---   | C---  | CCTCCATCACCAGCAGCTAGATAGCCTTATATCAGAGGCCGAAAC     | --- | CCGAG | GTTATTACAGGTTAT | 708 |   |   |   |   |    |   |       |   |       |   |
| L03561    | AGTACCTTTGCTCCTCCCTCGTGGCTT                                                                           | ---   | C---  | CCTCCATCACCAGCAGCTAGATAGCCTTATATCAGAGGCCGAAAC     | --- | CCGAG | GTTATTACAGGTTAT | 708 |   |   |   |   |    |   |       |   |       |   |
| AF259264  | AGTACCTTTGCTCCTCCCTCGTGGCTT                                                                           | ---   | C---  | CCTCCATCACCAGCAGCTAGATAGCCTTATATCAGAGGCCGAAAC     | --- | CCGGG | GTTATTACAGGTTAT | 708 |   |   |   |   |    |   |       |   |       |   |
| AY563953  | AGTACCTTTGCTCCTCCCTCGTGGCCT                                                                           | ---   | C---  | CCTCCATCACCAGCAGCTAGATAGCCTTATATCAGAGGCCGAAAC     | --- | CCGAG | GTTATTACAGGTTAT | 708 |   |   |   |   |    |   |       |   |       |   |
| AY563954  | AGTACCTTTGCTCCTCCCTCGTGGCCT                                                                           | ---   | C---  | CCTCCATCACCAGCAGCTAGATAGCCTTATATCAGAGGCCGAAAC     | --- | CCGAG | GTTATTACAGGTTAT | 708 |   |   |   |   |    |   |       |   |       |   |
| U19949    | AGTACCTTTGCTCCTCCCTCGTGGCCT                                                                           | ---   | C---  | CCTCCATCACCAGCAGCTAGATAGCCTTATATCAGAGGCCGAAAC     | --- | CCGAG | GTTATTACAGGTTAT | 708 |   |   |   |   |    |   |       |   |       |   |
| J02029    | AGTACCTTTGCTCCTCCCTCGTGGCCT                                                                           | ---   | C---  | CCTCCATCACCAGCAGCTAGATAGCCTTATATCAGAGGCCGAAAC     | --- | CCGAG | GTTATTACAGGTTAT | 708 |   |   |   |   |    |   |       |   |       |   |
| D13748    | AGTACCTTTGCTCCTCCCTCGTGGCTT                                                                           | ---   | C---  | CCTCCATCACCAGCAGCTAGATAGCCTTATATCAGAGGCCGAAAC     | --- | TCGAG | GTTATTACAGGTTAT | 708 |   |   |   |   |    |   |       |   |       |   |
| AF033817  | AGTACCTTTGCTCCTCCCTCGTGGCTT                                                                           | ---   | C---  | CCTCCATCACCAGCAGCTAGATAGCCTTATATCAGAGGCCGAAAC     | --- | TCGAG | GTTATTACAGGTTAT | 708 |   |   |   |   |    |   |       |   |       |   |
| NC_001436 | AGTACCTTTGCTCCTCCCTCGTGGCTT                                                                           | ---   | C---  | CCTCCATCACCAGCAGCTAGATAGCCTTATATCAGAGGCCGAAAC     | --- | TCGAG | GTTATTACAGGTTAT | 708 |   |   |   |   |    |   |       |   |       |   |
| AF074966  | AGTACCTTTGCTCCTCCCTCGTGGCCT                                                                           | ---   | C---  | CCTCCATCACCAGCAGCTAGATAGCCTTATATCAGAGGCCGAAAC     | --- | TCGAG | GTTATTACAGGTTAT | 708 |   |   |   |   |    |   |       |   |       |   |
| NC_000858 | AGTACCTTTGCTCCTCCCTCGTGGCCT                                                                           | ---   | C---  | CCTCCATCACCAGCAGCTAGATAGCCTTATATCAGAGGCCGAAAC     | --- | TCGAG | GTTATTACAGGTTAT | 708 |   |   |   |   |    |   |       |   |       |   |
| L02534    | AGTACCTTTGCTCCTCCCTAGTAGCTT                                                                           | ---   | C---  | CCTCCATCACCAGCAGCTAGATAGCCTTATATCAGAGGCTGAGAC     | --- | TCGAG | GTTATTACAGGATAT | 713 |   |   |   |   |    |   |       |   |       |   |
| Z46900    | AATACCTTTGCTCCTCCCTGGTGGCTT                                                                           | ---   | C---  | CCTCCATCACCAACAGCTAGATAGCCTTATGTGAGAAAGCCGAGAC    | --- | TCGAG | GTTATTACAGGCTAT | 707 |   |   |   |   |    |   |       |   |       |   |
| AY590142  | AGTATCTATGTTCCCTTAATAGCCT                                                                             | ---   | C---  | CCTCCACCATCAACAGCTAGATAGCCTCATCTCAGAGGCAGAAAC     | --- | CCGAG | GAATTACCGGATAC  | 750 |   |   |   |   |    |   |       |   |       |   |
| AF033818  | AATATAT-TGCT--TCCCCGGTTCGATCAAACG-GCCCACATGACCAGC--CTAACGGCAGCAATAGCCCGCTGAAGCGGCCAATACCCTCCAGGGTTT   |       |       |                                                   |     |       |                 | 695 |   |   |   |   |    |   |       |   |       |   |
| NC_001414 | AATATAT-TGCT--TCCCCGGTTCGATCAAACG-GCCCACATGACCAGC--CTAACGGCAGCAATAGCCCGCTGAAGCGGCCAATACCCTCCAGGGTTT   |       |       |                                                   |     |       |                 | 695 |   |   |   |   |    |   |       |   |       |   |
| K02120    | AATATAT-TGCT--TCCCCGGTTCGATCAAACG-GCCCACATGACCAGC--CTAACGGCAGCAATAGCCCGCTGAAGCGGCCAATACCCTCCAGGGTTT   |       |       |                                                   |     |       |                 | 694 |   |   |   |   |    |   |       |   |       |   |
| D00647    | AATATAT-TGCT--TCCCCGGTTCGATCAAACG-GCCCACATGACCAGC--CTAACGGCAGCAATAGCCG---CTGAAGCGGC-AATACCCTCCAGGGTTT |       |       |                                                   |     |       |                 | 691 |   |   |   |   |    |   |       |   |       |   |
| AF257515  | AATATAT-TGCT--TCCCCGGTTCGATCAAACG-GCCCACATGACTAGC--CTAACGGCAGCAATAGCTGCCGCTGAAGCGGCCAATACCCTCCAGGGTTT |       |       |                                                   |     |       |                 | 695 |   |   |   |   |    |   |       |   |       |   |

ruler .....710.....720.....730.....740.....750.....760.....770.....780.....790.....800

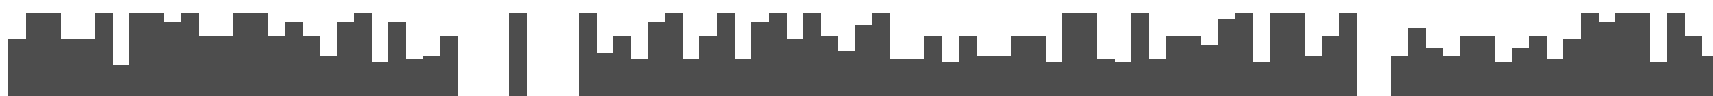



```

**  **      ** * *      * * * *      * * * *      * * * *      * * * *      * * * *      * * * *
M10060 -AA- CCCCATGGCAGGGCCCCTAAGAATGCAGGCTAATAACCCCGCCAGCA---AGGT-CTTAGACGGGAGTACCAGAATCTTTGGCTGGCTGCTTTCT 817
NC_001488 -AA- CCCCATGGCAGGGCCCCTAAGAATGCAGGCTAATAACCCCGCCAGCA---AGGT-CTTAGACGGGAGTACCAGAATCTTTGGCTGGCTGCTTTCT 817
AF412314 -AA- CCCCATGGCAGGGCCCCTAAGAATGCAGGCTAATAACCCCGCCAGCA---AGGT-CTTAGACGGGAGTACCAGAATCTTTGGCTGGCTGCTTTCT 817
AF139382 -AA- CCCCATGGCAGGGCCCCTAAGAATGCAGGCTAATAACCCCGCCAGCA---AGGT-CTTAGACGGGAGTACCAGAACCTTTGGCTGGCTGCTTTCT 817
AF326584 -AA- CCCCATGGCAGGGCCCCTAAGAATGCAGGCTAATAACCCCGCCAGCA---AGGT-CTTAGACGGGAGTACCAGAACCTTTGGCTGGCTGCTTTCT 817
AF326583 -AA- CCCCATGGCAGGGCCCCTAAGAATGCAGGCTAATAACCCCGCCAGCA---AGGT-CTTAGACGGGAGTACCAGAACCTTTGGCTGGCTGCTTTCT 817
L20734 -AA- CCCCATGGCAGGGCCCCTAAGAATGCAGGCTAATAACCCCGCCCAACA---AGGT-CTTAGACGGGAGTACCAGAACCTTTGGCTGGCTGCTTTCT 817
Y13051 -AA- CCCCATGGCAGGGCCCCTAAGAATGCAGGCTAATAACCCCGCCCAACA---AGGT-CTTAGACGGGAATACCAGAACCTTTGGCTGGCTGCTTTCT 817
L11456 -AA- CCCCATGGCAGGGCCCCTAAGAATGCAGGCTAATAACCCCGCCCAACA---AGGT-CTTAGACGGGAATACCAGAACCTTTGGCTGGCTGCTTTCT 817
X89270 -AA- CCCCATGGCAGGGCCCCTAAGAATGCAGGCTAATAACCCCGCCCAACA---AGGT-CTTAGACGGGAATACCAGAACCTTTGGCTGGCTGCTTTCT 817
AF074965 -AA- CCCCATGGCAGGGCCCCTAAGAATGCAGGCTAATAACCCCGCCCAACA---AGGT-CTTAGACGGGAATACCAGAACCTTTGGCTGGCTGCTTTCT 752
Y14365 -AA- CCCCATGGCAGGGCCCCTAAGAATGCAGGCCAATAACCCCGCCAGCA---AGGT-CTTAGACGGGAGTACCAGAACCTTTGGCTGGCCGCTTTCT 817
Y14570 -AA- CCCCATGGCAGGGCCCCTAAGGATGCAGGCCAACAACCCCGCCAGCA---GGGA-CTCCGGAGGGAATACAAAACCTCTGGCTGGCGGCTTTT 814
NC_001815 -AA- CCCCATGGCAGGGCCCCTAAGGATGCAGGCCAACAACCCCGCCAGCA---GGGA-CTCCGGAGGGAATACAAAACCTCTGGCTGGCGGCTTTT 814
U90557 -AA- TCCCATGGCAGGGCCCCTAAGGATGCAGGCCAACAACCCCGCCAGGA---AGGA-CTCCGGAGGGAATACAAAACCTCTGGCTGGCAGCTTTT 815
Y07616 -AA- CCCCCTGGCCGGCCCCCTGC GGGTGAAGCTAATAATCCAAATCAGCA---AGGG-CTTCAAGAGAGTACCAAAGCTTGTGGTTATCGGCCTTCT 797
AY217650 -AA- CCCCCTGGCCGGCCCCCTGC GGGTGAAGCTAATAATCCAAATCAGCA---AGGG-CTTCAAGGGAGTACCAAAGCTTGTGGTTGTGGCCTTCT 794
AF517775 -AA- CCCCCTGGCCGGCCCCCTTGC GAGTACAGGCTAATAATCCAAATCAGCA---AGGG-CTTCGGAGAGAATATCAAACCTGTGGTTATCGGCCTTTT 793
AY22339 -AA- CCCCCTGGCCGGCCCCCTTGC GAGTACAGGCTAACAATCCAAATCAGCA---AGGG-CTTCGGAGAGAATATCAAACCTGTGGTTGTGGCCTTTT 793
NC_003323 -AA- CCCTCTGGCCGGCCCCCTAC GAGTACAGGCTAACAACCCAAATCAGCA---AGGG-CTTCGGAGAGAATATCAAACCTGTGGTTATCGGCCTTTT 794
L36905 -AA- CCCCCTTAGCCGGTCCCCCTCCGTGTCCAAGCCAACAATCCACAACAACA---AGGA-FTAAGGCGAGAATACCAGCAACTCTGGCTCGCCGCTTTCG 802
AF139170 -AA- CCCCCTTAGCCGGTCCCCCTCCGTGTCCAAGCCAACAATCCACAACAACA---AGGA-FTAAGGCGAGAATACCAGCAACTCTGGCTCGCCGCTTTCG 802
AF042071 -AA- CCCCCTTAGCCGGTCCCCCTCCGTGTCCAAGCCAACAATCCACAACAACA---AGGA-FTAAGGCGAGAATACCAGCAACTCTGGCTCGCCGCTTTCG 802
L03561 -AA- CCCCCTTAGCCGGTCCCCCTCCGTGTCCAAGCCAACAATCCACAACAACA---AGGA-FTAAGGCGAGAATACCAGCAACTCTGGCTCGCCGCTTTCG 802
AF259264 -AA- CCCCCTTAGCCGGTCCCCCTCCGTGTCCAAGCCAACAATCCACAACAACA---AGGA-FTAAGGCGAGAATACCAGCAACTCTGGCTCGCCGCTTTCG 802
AY563953 -AA- CCCCCTTAGCCGGTCCCCCTCCGTGTCCAAGCCAACAATCCACAACAACA---AGGA-FTAAGGCGAGAATACCAGCAACTCTGGCTCGCCGCTTTCG 802
AY563954 -AA- CCCCCTTAGCCGGTCCCCCTCCGTGTCCAAGCCAACAATCCACAACAACA---AGGA-FTAAGGCGAGAATACCAGCAACTCTGGCTCGCCGCTTTCG 802
U19949 -AA- CCCCCTTAGCCGGTCCCCCTCCGTGTCCAAGCCAACAATCCACAACAACA---AGGA-FTAAGGCGAGAATACCAGCAACTCTGGCTCGCCGCTTTCG 802
J02029 -AA- CCCATTAGCCGGTCCCCCTCCGTGTCCAAGCCAACAATCCACAACAACA---AGGA-FTAAGGCGAGAATACCAGCAACTCTGGCTCGCCGCTTTCG 802
D13748 -AA- CCCCCTTAGCCGGTCCCCCTCCGTGTCCAAGCCAACAATCCACAACAACA---AGGA-FTAAGGCGAGAATACCAGCAACTCTGGCTCGCCGCTTTCG 802
AF033817 -AA- CCCCCTTAGCCGGTCCCCCTCCGTGTCCAAGCCAACAATCCACAACAACA---AGGA-FTAAGGCGAGAATACCAGCAACTCTGGCTCGCCGCTTTCG 802
NC_001436 -AA- CCCCCTTAGCCGGTCCCCCTCCGTGTCCAAGCCAACAATCCACAACAACA---AGGA-FTAAGGCGAGAATACCAGCAACTCTGGCTCGCCGCTTTCG 802
AF074966 -AA- CCCCCTTAGCCGGTCCCCCTCCGTGTCCAAGCCAACAATCCACAGCAACA---AGGA-FTAAGGCGAGAATACCAGCAACTCTGGCTCGCCGCTTTCG 802
NC_000858 -AA- CCCCCTTAGCCGGTCCCCCTCCGTGTCCAAGCCAACAATCCACAGCAACA---AGGA-FTAAGGCGAGAATACCAGCAACTCTGGCTCGCCGCTTTCG 802
L02534 -AA- CCCCCTTGGCCGGTCCCCCTCCGTGTCCAAGCCAACAATCCACAGCAACA---AGGA-FTAAGGCGAGAATACCAGCAACTTTGGCTCACCCTTTCG 807
Z46900 -AA- CCCCCTTGGCTGGCCCCCTCCGTGTCCAGGCAATAACCCACAACAACA---AGGA-FTAAGGCGAGAATACCAGCAACTCTGGCTCGCTGCTTTT 801
AY590142 -AA- CCCCCTGGCCGGGACCCCTAC GGTGTCCAAGCTAACAACCCACAACAGCA---AGGA-CTCCGGCGAGAATACCAGCAACTCTGGCTCGCCGCTTTCT 844
AF033818 TAATCCCCAAAATGGG-ACCCTGA-----CCCAACAATCAGCTCAGCCCAACGCCGGGGACCTTAGAAGTCAATATCAAACCTTTGGCTTCAGGCCTGGA 790
NC_001414 TAATCCCCAAAATGGG-ACCCTGA-----CCCAACAATCAGCTCAGCCCAACGCCGGGGACCTTAGAAGTCAATATCAAACCTTTGGCTTCAGGCCTGGA 790
K02120 TAACCCCCAAAACGGGTACCCTAA-----CCCAACAATCAGCTCAGCCCAACGCCGGGATCTTAGAAGTCAATATCAAACCTTTGGCTTCAGGCCTGGA 789
D00647 TAATCCCCAAAATGGGAACCCTGA-----CCCAACAATCAGCTCAGCCCAACGCCGGAGATCTTAGGAGTCAATATCAAACCTCTGGCTTCAGGCCTGGA 786
AF257515 -AACCCCCAAAACGGGGACCCCTAA-----CCCAACAATCAGCTCAGCCCAACGCCGGGGATCTTAGAAGTCAATATCAAACCTCTGGCTTCAGGCCTGGA 790
ruler .....810.....820.....830.....840.....850.....860.....870.....880.....890.....900

```

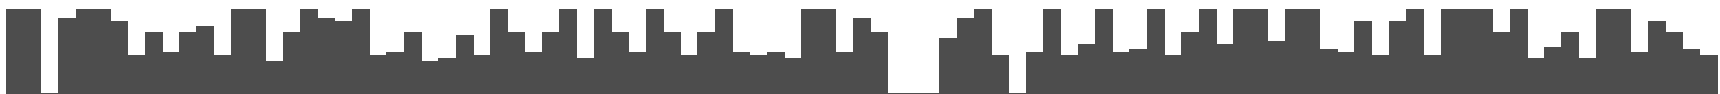

```

* **      *      *      *      *      *      *      *      *      *      *      *      *      *      *      *      *      *      *
M10060 CCACCC TGCCAGG CAATACCC GTG- ACCCCT CTTGGG CAGCTAT CCTACAGGGG CTGG-- AGGAACCC TATTGC GCGTTC GTAGAG CGCCT- TAACGTGG 913
NC_001488 CCACCC TGCCAGG CAATACCC GTG- ACCCCT CTTGGG CAGCTAT CCTACAGGGG CTGG-- AGGAACCC TATTGC GCGTTC GTAGAG CGCCT- TAACGTGG 913
AF412314 CCACCC TGCCAGG CAATACCC GTG- ACCCCT CTTGGG CAGCTAT CCTACAGGGG CTGG-- AGGAACCC TATTGC GCGTTC GTAGAG CGCCT- TAACGTGG 913
AF139382 CCACCC TGCCAGG CAATACCC GTG- ACCCCT CTTGGG CAGCTAT CCTACAGGGG CTGG-- AGGAACCC TATTGC GCGTTC GTAAAG CGCCT- TAACGTGG 913
AF326584 CCACCC TGCCAGG CAATACCC GTG- ACCCCT CTTGGG CAGCTAT CCTACAGGGG CTGG-- AGGAACCC TATTGC GCGTTC GTAGAG CGCCT- TAACGTGG 913
AF326583 CCACCC TGCCAGG CAATACCC GCG- ACCCCT CTTGGG CAGCTAT CCTACAGGGG CTGG-- AGGAACCC TATTGC GCGTTC GTAGAG CGCCT- TAACGTGG 913
L20734 CCACCC TTCAGG CAATACCC GTG- ACCCCT CTTGGG GGGTAT CCTACAGGGG CTGG-- AAGAACCC TACTGC GCGTTC GTAGAG CGCCT- TAATGTGG 913
Y13051 CCACCC TTCAGG CAATACCC GTG- ACCCCT CTTGGG GGGTAT CCTACAGGGG CTGG-- AAGAACCC TACTGC GCGTTC GTAGAG CGCCT- TAATGTGG 913
L11456 CCACCC TTCAGG CAATACCC GTG- ACCCCT CTTGGG GGGTAT CCTACAAGGG CTGG-- AAGAACCC TATTGC GCGTTC GTAGAG CGCCT- TAATGTGG 913
X89270 CCACCC TTCAGG CAATACCC GTG- ACCCCT CTTGGG CAGCTAT CCTACAGGGG CTGG-- AGGAACCC TACTGC GCGTTC GTAGAG CGCCT- TAATGTGG 913
AF074965 CCACCC TTCAGG CAATACCC GTG- ACCCCT CTTGGG GGGTAT CCTACAAGGG CTGG-- AAGAACCC TATTGC GCGTTC GTAGAG CGCCT- TAATGTGG 848
Y14365 CCACCC TGCCAGG CAACACCC GTG- ATCCCT CTTGGG GGGTAT CCTACAGGGG CTGG-- AGGAACCC TATTGC GCGTTC GTAGAA CGCCT- TAATGTGG 913
Y14570 CAGCTCTGCCAGGGAACACCCGCG- ACCCAT CCTGGG CAGCAATCTTGCAAGGGCTAG-- AGGAACCC TACTGC GCTTTT CGTAGAAC GCCT- TAATGTTG 910
NC_001815 CAGCTCTGCCAGGGAACACCCGCG- ACCCAT CCTGGG CAGCAATCTTGCAAGGGCTAG-- AGGAACCC TACTGC GCTTTT CGTAGAAC GCCT- TAATGTTG 910
U90557 CGGCTCTGCCAGGGAACACCCGCG- ACCCAT CTTGGG GGGCAATCTTGCAAGGGCTAG-- AAGAACCC TATTGC GCCTTG CTAGAG CGCCT- TAATGTTG 911
Y07616 CCGCTCTCCC GGGGAACACCAAGG- ACCCCACCT GGGG GGGTAT CCTCCAAGGTCCTG-- AGGAGCCCT TTTTGT CTTTTG TAGAAAGGCT- CAATGTGG 893
AY217650 CCGCTCTCCC GGGGAACACCAAGG- ACCCCACCT GGGG GGGTAT CCTCCAAGGTCCTG-- AGGAGCCCT TTTTGT CTTTTG TGGAAAGGCT- CAATGTGG 890
AF517775 CCGCACTCCCAGGGAACACTAAGG- ACCCCACT TGGG CAGTAT CCTCCAAGGACTG-- AGGAACCC TTTTGT CTTTTG TAGAAAGGCT- CAATATAG 889
AY22339 CCGCACTCCC GGGGAACACCAAGG- ACCCCACT TGGG CAGTAT CCTCCAAGGACTG-- AGGAGCCCT TTTTGT CTTTTG TAGAAAGGCT- CAATGTGG 889
NC_003323 CCGCCCTCCC GGGGAACACCAAGG- ACCCCACCT GGGG GGGCAT CCTCCAAGGACTG-- AAGAACCC TTTTGT CTTTTG TGGAGAGGCT- TAATGTGG 890
L36905 CCGCCCTGCCAGG GAGTGCCAAAG- ACCCTTCT GGGCCTCTAT CCTCCAAGGCCTGG-- AGGAGCCTT ACCACG CCTT CGTAGAAC GCCT- CAACATAG 898
AF139170 CCGCCCTGCCAGG GAGTGCCAAAG- ACCCTTCT GGGCCTCTAT CCTCCAAGGCCTGG-- AGGAGCCTT ACCACG CCTT CGTAGAAC GCCT- CAACATAG 898
AF042071 CCGCCCTGCCAGG GAGTGCCAAAG- ACCCTTCT GGGCCTCTAT CCTCCAAGGCCTGG-- AGGAGCCTT ACCACG CCTT CGTAGAAC GCCT- CAACATAG 898
L03561 CCGCCCTGCCAGG GAGTGCCAAAG- ACCCTTCT GGGCCTCTAT CCTCCAAGGCCTGG-- AGGAGCCTT ACCACG CCTT CGTAGAAC GCCT- CAACATAG 898
AF259264 CCGCCCTGCCAGG GAGTGCCAAAG- ACCCTTCT GGGCCTCTAT CCTCCAAGGCCTGG-- AGGAGCCTT ACCACG CCTT CGTAGAAC GCCT- CAACATAG 898
AY563953 CCGCCCTGCCAGG GAGTGCCAAAG- ACCCTTCT GGGCCTCTAT CCTCCAAGGCCTGG-- AGGAGCCTT ACCACG CCTT CGTAGAAC GCCT- CAACATAG 898
AY563954 CCGCCCTGCCAGG GAGTGCCAAAG- ACCCTTCT GGGCCTCTAT CCTCCAAGGCCTGG-- AGGAGCCTT ACCACG CCTT CGTAGAAC GCCT- CAACATAG 898
U19949 CCGCCCTGCC GGGGAGTGCTAAAG- ACCCTTCT GGGCCTCTAT CCTCCAAGGCCTGG-- AGGAGCCTT ACCACG CCTT CGTAGAAC GCCT- CAACATAG 898
J02029 CCGCCCTGCC GGGGAGTGCCAAAG- ACCCTTCT GGGCCTCTAT CCTCCAAGGCCTGG-- AGGAGCCTT ACCACG CCTT CGTAGAAC GCCT- CAACATAG 898
D13748 CCGCCCTGCCAGG GAGTGCCAAAG- ACCCTTCT GGGCCTCTAT CCTCCAAGGCCTGG-- AGGAGCCTT ACCACG CCTT CGTAGAAC GCCT- CAACATAG 898
AF033817 CCGCCCTGCCAGG GAGTGCCAAAG- ACCCTTCT GGGCCTCTAT CCTCCAAGGCCTGG-- AGGAGCCTT ACCACG CCTT CGTAGAAC GCCT- CAACATAG 898
NC_001436 CCGCCCTGCCAGG GAGTGCCAAAG- ACCCTTCT GGGCCTCTAT CCTCCAAGGCCTGG-- AGGAGCCTT ACCACG CCTT CGTAGAAC GCCT- CAACATAG 898
AF074966 CCGCCCTACCAGG GAGTGCCAAAG- ACCCTTCT GGGCCTCTAT CCTCCAAGGCCTGG-- AGGAGCCTT ACCACG CCTT CGTAGAAC GTCT- CAACGTAG 898
NC_000858 CCGCCCTACCAGG GAGTGCCAAAG- ACCCTTCT GGGCCTCTAT CCTCCAAGGCCTGG-- AGGAGCCTT ACCACG CCTT CGTAGAAC GTCT- CAACGTAG 898
L02534 CCGCCCTGCC TGGGAGTGCCAAAG- ACCCTTCT GGGCCTCCAT CCTCCAAGGCCTAG-- AGGAGCCTT ACCACG CCTT CGTAGAAC GCCT- CAACGTAG 903
Z46900 CCGCCCTGCCAGG GAGCGCTAAAG- ACCCTTCT GGGCCTCTAT CCTCCAAGGCCTGG-- AAGAGCCTT ACCACG CCTT TGTAGAAC GCCT- CAATGTAG 897
AY590142 CTGCCTTGCCAGG GAGTGCCAAAG- ACCCCTCAT GGGCCTCCAT CCTTCAGGGTCTAG-- AAGAACCC TACTCT TTTTGT GGGAGCGCT- CAATGTAG 940
AF033818 AAAATCTCCCTACT CGTCCTT CAG- TACAACCC TGGTCCACCATCGTCCAAGGCCCGCCGAGAGCTATGTAGAG-- TTTGTCAACC GGTACAA-ATTT 886
NC_001414 AAAATCTCCCTACT CGTCCTT CAG- TACAACCC TGGTCCACCATCGTCCAAGGCCCGCCGAGAGCTATGTAGAG-- TTTGTCAACC GGTACAA-ATTT 886
K02120 AAAATCTCCCTACT CGTCCTT CAGTACAACCTTGGTCCACCATCGTCCAAGGCCCGCCGAAAGCTCTGTAGAG-- TTTGTCAACC GGTACAA-ATTT 886
D00647 AGAATCTCCCTACT CGTCCTT CAGGTACAACCC TGGTCCACCATCGTCCAAGGCCCGCCGAGAGCTATGTAGAG-- TTTGTCAACC GGTACAA-ATTT 883
AF257515 AAAATCTCCCTACT CGGCCTT CAG- TCCAACCC TGGTCCACCATCGTCCAAGGCCCGCCGAAAGCTATGTAGAA-- TTTGTCAACC GGTACAA-ATTT 886

```

ruler .....910.....920.....930.....940.....950.....960.....970.....980.....990.....1000

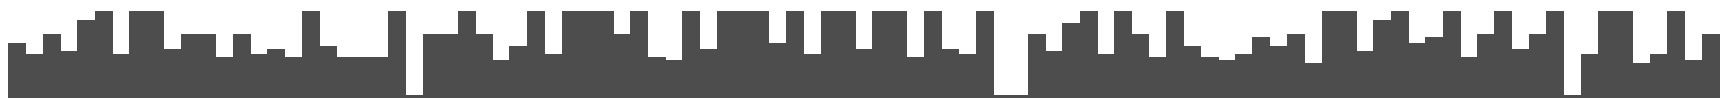

```

* * * * * ** ** ** ** * ** ** ** * ** * ** * ** * ** * ** * ** * ** * ** * ** * ** * ** *
M10060 CCCTTGACAACGGCCTCCCCGAGGGTACCCCCAAAGAGCCCATCTTACGTTCCCTAGCGTACTCAAACGCCAACAAAGAATGCCAAAAAATCTTACAAGC 1013
NC_001488 CCCTTGACAACGGCCTCCCCGAGGGTACCCCCAAAGAGCCCATCTTACGTTCCCTAGCGTACTCAAACGCCAACAAAGAATGCCAAAAAATCTTACAAGC 1013
AF412314 CCCTTGACAACGGCCTCCCCGAGGGTACCCCCAAAGAGCCCATCTTACGTTCCCTAGCGTACTCAAACGCCAACAAAGAATGCCAAAAAATCTTACAAGC 1013
AF139382 CCCTTGACAACGGCCTCCCCGAAAGGTACCCCCAAAGAGCCCATCTTACGTTCCCTAGCGTACTCAAACGCCAACAAAGAATGCCAAAAAATCTTACAAGC 1013
AF326584 CCCTTGACAACGGCCTCCCCGAAAGGTACCCCCAAAGAGCCCATCTTACGTTCCCTAGCGTACTCAAACGCCAACAAAGAATGCCAAAAAATCTTACAAGC 1013
AF326583 CCCTTGACAACGGCCTCCCCGAAAGGTACCCCCAAAGAGCCCATCTTACGTTCCCTAGCGTACTCAAACGCCAACAAAGAATGCCAAAAAATCTTACAAGC 1013
L20734 CCCTTGACAACGGCCTCCCCGAGGGCACCCCCAAAGAGCCCATCTTACGTTCCCTAGCGTACTCAAATGCCAACAAAGAATGCCAAAAAATCTTACAAGC 1013
Y13051 CCCTTGACAACGGCCTCCCCGAGGGCACCCCCAAAGAGCCCATCTTACGTTCCCTAGCGTACTCAAATGCCAACAAAGAATGCCAAAAAATCTTACAAGC 1013
L11456 CCCTTGACAACGGCCTCCCCGAGGGCACCCCCAAAGAGCCCATCTTACGTTCCCTAGCGTACTCAAATGCCAACAAAGAATGCCAAAAAATCTTACAAGC 1013
X89270 CCCTTGACAACGGCCTCCCCGAGGGTACCCCCAAAGAGCCCATCTTACGTTCCCTAGCGTACTCAAATGCCAACAAAGAATGCCAGAAAATCTTACAAGC 1013
AF074965 CCCTTGACAACGGCCTCCCCGAGGGCACCCCCAAAGAGCCCATCTTACGTTCCCTAGCGTACTCAAACGCCAACAAAGAATGCCAAAAAATCTTACAAGC 948
Y14365 CCCTCGATAACGGCCTCCCCGAAAGGTACCCCCAAGGAGCCCATCTTACGTTCCCTAGCGTACTCAAACGCCAACAAAGAGTGCCAGAAAATCTTACAGGC 1013
Y14570 CCCTTGACAACGGCCTCCCCGAAAGGAACCCCCAAAGAGCCCATCTTGGCTCCCTGGCTACTCCAACGCTAATAAAGATTGCCAAAAATTGCTGCAGGC 1010
NC_001815 CCCTTGACAACGGCCTCCCCGAAAGGAACCCCCAAAGAGCCCATCTTGGCTCCCTGGCTACTCCAACGCTAATAAAGATTGCCAAAAATTGCTGCAGGC 1010
U90557 CTCTTGACAACGGTCTCCCCGAGGGAACCCCCAAAGGAGCCCATCTTGGCTCCCTGGCTTACTCCAACGCCAACAAAGACTGCCAAAAACT--TGCAGGC 1009
Y07616 CTTTGGATAATGGCCTCCCAGAAAGGCACCCCCAAGGATCCAATCCTTAGGTCCTCGCTACTCAAATGCAAAATAAAGAATGTCAAAAATCTTACAAGC 993
AY217650 CTTTGGATAATGGCCTCCCAGAAAGGCACCCCCAAGGATCCAATCCTGAGGTCCTCGCTATTCAAATGCAAAATAAAGAATGTCAAAAATCTTACAAGC 990
AF517775 CTTTGGATAATGGCCTCCCCGAAAGGAACCCCCAAAGATCCAATCCTTAGGTCCTCGCTATTCAAACGCAAAATAAAGAGTGCCAAAAATCTTACAGGC 989
AY22339 CTTTGGATAATGGTCTCCCCGAAAGGAACCCCCAAGGATCCAATCCTTAGGTCCTCGCTATTCAAACGCAAAATAAAGAGTGCCAAAAATCTTACAGGC 989
NC_003323 CTTTGGATAATGGCCTTCCGGAAGGTACCCCCAAAGATCCAATCCTTAGGTCCTCGCTATTCAAACGCTAATAAAGAATGTCAAAAATCTTACAGGC 990
L36905 CTCTTGACAATGGGCTGCCAGAAAGGCACGCCCAAAGACCCCATCTTACGTTCCCTTAGCCTACTCCAATGCAAAACAAAGAATGCCAAAAATTACTACAGGC 998
AF139170 CTCTTGACAATGGGCTGCCAGAAAGGCACGCCCAAAGACCCCATCTTACGTTCCCTTAGCCTACTCCAATGCAAAACAAAGAATGCCAAAAATTACTACAGGC 998
AF042071 CTCTTGACAATGGGCTGCCAGAAAGGCACGCCCAAAGACCCCATCTTACGTTCCCTTAGCCTACTCCAATGCAAAACAAAGAATGCCAAAAATTACTACAGGC 998
L03561 CTCTTGACAATGGGCTGCCAGAAAGGCACGCCCAAAGACCCCATCTTACGTTCCCTTAGCCTACTCCAATGCAAAACAAAGAATGCCAAAAATTACTACAGGC 998
AF259264 CTCTTGACAATGGGCTGCCAGAAAGGCACGCCCAAAGACCCCATCTTACGTTCCCTTAGCCTACTCCAATGCAAAACAAAGAATGCCAAAAATTACTACAGGC 998
AY563953 CTCTTGACAATGGGCTGCCAGAAAGGCACGCCCAAAGACCCCATCTTACGTTCCCTTAGCCTACTCCAATGCAAAACAAAGAATGCCAAAAATTACTACAGGC 998
AY563954 CTCTTGACAATGGGCTGCCAGAAAGGCACGCCCAAAGACCCCATCTTACGTTCCCTTAGCCTACTCCAATGCAAAACAAAGAATGCCAAAAATTACTACAGGC 998
U19949 CTCTTGACAATGGGCTGCCAGAAAGGCACGCCCAAAGACCCCATCTTACGTTCCCTTAGCCTACTCCAATGCAAAACAAAGAATGCCAAAAATTACTACAGGC 998
J02029 CTCTTGACAATGGGCTGCCAGAAAGGCACGCCCAAAGACCCCATCTTACGTTCCCTTAGCCTACTCCAATGCAAAACAAAGAATGCCAAAAATTACTACAGGC 998
D13748 CTCTTGACAATGGGCTGCCAGAAAGGCACGCCCAAAGACCCCATTTTACGTTCCCTTAGCCTACTCTAATGCAAAACAAAGAATGCCAAAAATTACTACAGGC 998
AF033817 CTCTTGACAATGGGCTGCCAGAAAGGCACGCCCAAAGACCCCATTTTACGTTCCCTTAGCCTACTCTAATGCAAAACAAAGAATGCCAAAAATTACTACAGGC 998
NC_001436 CTCTTGACAATGGGCTGCCAGAAAGGCACGCCCAAAGACCCCATTTTACGTTCCCTTAGCCTACTCTAATGCAAAACAAAGAATGCCAAAAATTACTACAGGC 998
AF074966 CCCTTGACAATGGACTGCCGGAAGGCACGCCCAAAGACCCCATTTTACGATCCTTAGCCTACTCCAACGCAAAACAAAGAATGCCAGAACTACTACAGGC 998
NC_000858 CCCTTGACAATGGACTGCCGGAAGGCACGCCCAAAGACCCCATTTTACGATCCTTAGCCTACTCCAACGCAAAACAAAGAATGCCAGAACTACTACAGGC 998
L02534 CCCTTGATAATGGACTACCAGAAAGGCACGCCCAAAGACCCCATTTTACGTTCCCTTAGCCTACTCCAATGCAAAACAAAGGAGTGCCAAAAATTACTACAGGC 1003
Z46900 CCCTTGATAACGGACTGCCAGAAAGGCACGCCCAAAGACCCATTTTACGTTCCCTTAGCCTACTCCAATGCAAAATAAGGAGTGCCAAAAATTACTACAGGC 997
AY590142 CATTAGATAATGGGCTACCAGAAAGGCACCTCTAAAGACCCATCCTTCGCTCCCTGGCTACTCTAACGCCAACAAAGGAATGCCAAAAGCTACTACAGGC 1040
AF033818 CATTAGCTGACAACCTTCCCACGGAGTCCCTAAAGAACCATTATTGACTCCCTTAGCTATGCTAATGCTAACAAAGAATGCCAACAAATTTTGCAGG 986
NC_001414 CATTAGCTGACAACCTTCCCACGGAGTCCCTAAAGAACCATTATTGACTCCCTTAGCTATGCTAATGCTAACAAAGAATGCCAACAAATTTTGCAGG 986
K02120 CATTAGCTGACAACCTTCCCACGGAGTCC-TAAGGAACCCATTATTGACTCCCTTAGTTATGCAAATGCTAACAGAGAGTGTGAGCAAATTTTGCAGGG 985
D00647 CATTAGCTGACAACCTTCCCACGGAGTCCCTAAAGAACCATTATTGACTCCCTTAGTTATGCAAATGCTAACAAAGAATGCCAACAAATTTTGCAGGG 983
AF257515 CATTAGCTGACAACCTTCCCACGGAGTCCCTAAAGAACCATTATTGACTCTCTTAGTTATGCAAATGCTAACAAAGAATGCCAACAAATTTTGCAGGG 986
ruler .....1010.....1020.....1030.....1040.....1050.....1060.....1070.....1080.....1090.....1100

```

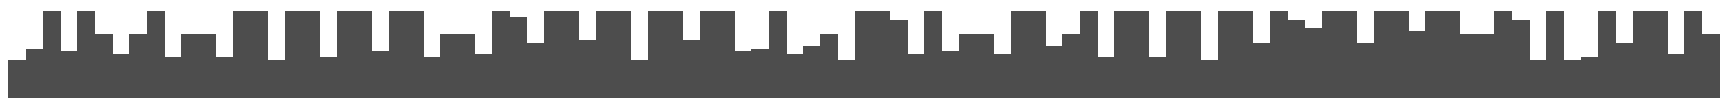

```

*  *  *  *  *  *  *  *  *  *  *  *  *  *  *  *  *  *  *  *
M10060 CCGCGGACACACTAACAGCCCC-TTGGGGAGATGCTCCGGACATGT-CAGGCGTGGACACCCAAGGACAAAAAC-----CA 1087
NC_001488 CCGCGGACACACTAACAGCCCC-TTGGGGAGATGCTCCGGACATGT-CAGGCGTGGACACCCAAGGACAAAAAC-----CA 1087
AF412314 CCGCGGACACACTAACAGCCCC-TTGGGGAGATGCTCCGGACATGT-CAGGCGTGGACACCCAAGGACAAAAAC-----CA 1087
AF139382 CCGCGGACACACTAACAGCCCC-TTGGGGAGATGCTCCGGACATGT-CAGGCGTGGACACCCAAGGACAAAAAC-----CA 1087
AF326584 CCGCGGACACACTAACAGCCCC-TTGGGGAGATGCTCCGGACATGT-CAGGCGTGGACACCCAAGGACAAAAAC-----CA 1087
AF326583 CCGCGGACACACTAACAGCCCC-TTGGGGAGATGCTCCGGACATGT-CAGGCGTGGACACCCAAGGACAAAAAC-----CA 1087
L20734 CCGTGGACACACTAACAGCCCC-TCGGGGAGATGCTTCGGGCATGC-CAAGCGTGGACACCCAAGGACAAAAAC-----CA 1087
Y13051 CCGTGGACACACTAACAGCCCC-TCGGGGAGATGCTTCGGGCATGC-CAGGCGTGGACACCCAAGGACAAAAAC-----CA 1087
L11456 CCGTGGACACACTAACAGCCCC-TCGGGGAGATGCTTCGGGCATGC-CAGGCGTGGACACCCAAGGACAAAAAC-----CA 1087
X89270 CCGTGGACCCACTAACAGCCCC-TCGGGGAGATGCTTCGGGCATGC-CAGGCGTGGACACCCAAGGACAAAAAC-----CA 1087
AF074965 CCGTGGACACACTAACAGCCCC-TCGGGGAGATGCTTCGGGCATGC-CAGGCGTGGACACCCAAGGACAAAAAC-----CA 1022
Y14365 CCGCGGACATACTAACAGCCCC-TTGGGGAGATGCTCCGGGCATGT-CAGACATGGACACCCAAGGACAAAAAC-----CA 1087
Y14570 CCGGGGCCATACTAATAGCCCC-TAGGGGACATGCTCCGAGCCTGC-CAAGCATGGACACCCAAGGACAAAGC-----CC 1084
NC_001815 CCGGGGCCATACTAATAGCCCC-TAGGGGACATGCTCCGAGCCTGC-CAAGCATGGACACCCAAGGACAAAGC-----CC 1084
U90557 TCGGGGCCATACTAATAGCCCC-TGGGAGACATGCTCCGAGCCTGT-CAAGCATGGACACCCAAGGACAAAGC-----CC 1083
Y07616 CCGAGGGCAAACCTAATAGTCCGC-TAGGGGAAATGCTCAGGGCCTGC-CAAACCTGGACACCCCAGAGACAAAAG-----CA 1067
AY217650 CCGAGGGCAAACCAACAGCCCGC-TAGGGGAAATGCTCAGGGCCTGC-CAAACCTGGACACCCCAGAGACAAAAA-----CA 1064
AF517775 CCGAGGGCAAACCAACAGCCCGC-TAGGGGAAATGCTCAGGGCCTGC-CAAGCTTGGACACCCCAGGACAAAAA-----CA 1063
AY22339 CCGAGGACAAACCAACAGCCCGC-TAGGGGAAATGCTCAGGGCCTGC-CAAACCTGGACACCCCAGGACAAAAA-----CA 1063
NC_003323 CCGAGGACAGACCAATAGCCCGT-TAGGGGAAATGCTCAGGGCCTGC-CAAACCTGGACACCCCAGAGATAAAAA-----CA 1064
L36905 CCGAGGACACACTAATAGCCCTC-TAGGAGATATGTTGCGGGCTTGT-CAGACCTGGACACCCCAAGACAAAAAC-----CA 1072
AF139170 CCGAGGACACACTAATAGCCCTC-TAGGAGATATGTTGCGGGCTTGT-CAGACCTGGACACCCCAAGACAAAAAC-----CA 1072
AF042071 CCGAGGACACACTAATAGCCCTC-TAGGAGATATGTTGCGGGCTTGT-CAGGCTTGGACACCCCAAGACAAAAAC-----CA 1072
L03561 CCGAGGACACACTAATAGCCCTC-TAGGAGATATGTTGCGGGCTTGT-CAGACCTGGACACCCCAAGACAAAAAC-----CA 1072
AF259264 CCGAGGACACACTAATAGCCCTC-TAGGAGATATGTTGCGGGCTTGT-CAGACCTGGACACCCCAAGACAAAAAC-----CA 1072
AY563953 CCGAGGACACACTAATAGCCCTC-TAGGAGATATGTTGCGGGCTTGT-CAGACCTGGACACCCCAAGACAAAAAC-----CA 1072
AY563954 CCGAGGACACACTAATAGCCCTC-TAGGAGATATGTTGCGGGCTTGT-CAGACCTGGACACCCCAAGACAAAAAC-----CA 1072
U19949 CCGAGGACACACTAATAGCCCTC-TAGGGGATATGTTGCGGGCTTGT-CAGACCTGGACACCCCAAGACAAAAAC-----CA 1072
J02029 CCGAGGACACACTAATAGCCCTC-TAGGAGATATGTTGCGGGCTTGT-CAGACCTGGACACCCCAAGACAAAAAC-----CA 1072
D13748 CCGAGGGCACACTAATAGCCCTC-TAGGAGATATGTTGCGGGCTTGT-CAGGCTTGGACACCCCAAGACAAAAAC-----CA 1072
AF033817 CCGAGGGCACACTAATAGCCCTC-TAGGAGATATGTTGCGGGCTTGT-CAGGCTTGGACACCCCAAGACAAAAAC-----CA 1072
NC_001436 CCGAGGGCACACTAATAGCCCTC-TAGGAGATATGTTGCGGGCTTGT-CAGGCTTGGACACCCCAAGACAAAAAC-----CA 1072
AF074966 CCGAGGACACACTAATAGCCCTC-TAGGAGATATGTTGCGGGCTTGT-CAGGCTTGGACACCCCAAGACAAAAAC-----CA 1072
NC_000858 CCGAGGACACACTAATAGCCCTC-TAGGAGATATGTTGCGGGCTTGT-CAGGCTTGGACACCCCAAGACAAAAAC-----CA 1072
L02534 CCGAGGACACACCAATAGCCCTC-TAGGAGATATGCTACGGGCTTGT-CAGGCTTGGACACCCCAAGACAAAAAC-----TA 1077
Z46900 TCGAGGACACACCAATAGTCCCTC-TAGGAGATATGCTGCGGGCTTGT-CAGGCTTGGACACCCCAAGACAAAAAC-----CA 1071
AY590142 CAGGGGGCATACTAACAGCCCC-TGGGAGACATGTTGCGAGCCTGC-CAGGCTGGGCCCCTAAGGACAAAGC-----CA 1114
AF033818 GCGGGG-CCTAGTGGCCGCCCCGGTGGGACAAAAACTGCAGGCTTGTGCACA-TTGGGCCCCAAGGTT-AAAACAGCCTGCAATCCTCGTCCACACCCCA 1083
NC_001414 GCGGGG-CCTAGTGGCCGCCCCGGTGGGACAAAAACTGCAGGCTTGTGCACA-TTGGGCCCCAAGGTT-AAAACAGCCTGCAATCCTCGTCCACACCCCA 1083
K02120 GCGAGG-CC-AGTGGCCGC---GGTGGGCAAAAACTGCAGGCTTGTGCACAATTTGGGCCCCAAGAATGAAACAGCCTGCACTTCTCGTCCACACCCCA 1080
D00647 GCGGGG-CCTAGTGGCCGCCCCGGTGGGACAAAAACTGCAGGCTTGTGCACA-CTGGGCCCCAAGACT-AAAACAGCCTGCAATCCTCGTCCACACCCCA 1080
AF257515 GCGGGG-CCTAGTGGCCGCCCCGGTGGGCAAAAACTGCAGGCTTGTGCACA-TTGGGCCCCAAGATC-AAAACAGCCTGCGATCCTCGTCCACACCCCA 1083
ruler .....1110.....1120.....1130.....1140.....1150.....1160.....1170.....1180.....1190.....1200

```

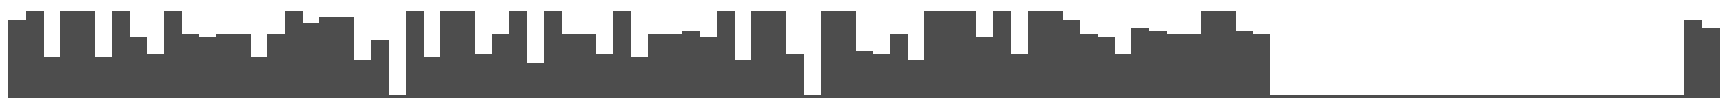

|           |                    |                |          |           |       |         |     |     |     |        |             |                 |                 |                  |      |      |   |   |    |    |     |   |    |   |
|-----------|--------------------|----------------|----------|-----------|-------|---------|-----|-----|-----|--------|-------------|-----------------|-----------------|------------------|------|------|---|---|----|----|-----|---|----|---|
|           |                    | *              |          | *         | *     | ***     |     | *   |     | **     | **          | *               | **              | *                | *    | *    | * | * | ** | ** | *** | * | ** | * |
| M10060    | AGGTCCTTGTGGTCCAA  | CCACGGAGG      | CCCCCCCC | CACA      | ---   | C       | --- | --- | --- | AGCCC  | TGCTTT      | CGTTGTGGCAAGG   | TAGGACACTGGAGT  | CGGGACTG         | ---  | 1172 |   |   |    |    |     |   |    |   |
| NC_001488 | AGGTCCTTGTGGTCCAA  | CCACGGAGG      | CCCCCCCC | CACA      | ---   | C       | --- | --- | --- | AGCCC  | TGCTTT      | CGTTGTGGCAAGG   | TAGGACACTGGAGT  | CGGGACTG         | ---  | 1172 |   |   |    |    |     |   |    |   |
| AF412314  | AGGTCCTTGTGGTCCAA  | CCACGGAGG      | CCCCCCCC | CACA      | ---   | C       | --- | --- | --- | AGCCC  | TGCTTT      | CGTTGTGGCAAGG   | TAGGACACTGGAGT  | CGGGACTG         | ---  | 1172 |   |   |    |    |     |   |    |   |
| AF139382  | AGGTCCTTGTGGTCCAA  | CCACGGAAG      | CCCCCCCC | CACA      | ---   | C       | --- | --- | --- | AGCCC  | TGCTTT      | CGTTGTGGCAAGAT  | TAGGACACTGGAGT  | CGGGACTG         | ---  | 1172 |   |   |    |    |     |   |    |   |
| AF326584  | AGGTCCTTGTGGTCCAA  | CCACGGAAG      | CCCCCCCC | CACA      | ---   | C       | --- | --- | --- | AGCCC  | TGCTTT      | CGTTGTGGCAAGAT  | TAGGACACTGGAGT  | CGGGACTG         | ---  | 1172 |   |   |    |    |     |   |    |   |
| AF326583  | AGGTCCTTGTGGTCCAA  | CCACGGAAG      | CCCCCCCC | CACA      | ---   | C       | --- | --- | --- | AGCCC  | TGCTTT      | CGTTGTGGCAAGAT  | TAGGACACTGGAGT  | CGGGACTG         | ---  | 1172 |   |   |    |    |     |   |    |   |
| L20734    | AGGTCCTTGTGGTCCAA  | CCACGGAGG      | CCCCCCCC | CACA      | ---   | C       | --- | --- | --- | AGCCC  | TGCTTT      | CGTTGTGGCAAGAT  | TAGGACACTGGAGT  | CGGGACTG         | ---  | 1172 |   |   |    |    |     |   |    |   |
| Y13051    | AGGTCCTTGTGGTCCAA  | CCACGGAGG      | CCCCCCCC | CACA      | ---   | C       | --- | --- | --- | AGCCC  | TGCTTT      | CGTTGTGGCAAAA   | TAGGACACTGGAGT  | CGGGACTG         | ---  | 1172 |   |   |    |    |     |   |    |   |
| L11456    | AGGTCCTTGTGGTCCAA  | CCACGGAGG      | CCCCCCCC | CACA      | ---   | C       | --- | --- | --- | AGCCC  | TGCTTT      | CGTTGTGGCAAGG   | TAGGACACTGGAGT  | CGGGACTG         | ---  | 1172 |   |   |    |    |     |   |    |   |
| X89270    | AGGTCCTTGTGGTCCAA  | CCACGGAGG      | CCCCCCCC | CACA      | ---   | C       | --- | --- | --- | AGCCC  | TGCTTT      | CGTTGTGGCAAGAT  | TAGGACACTGGAGT  | CGGGACTG         | ---  | 1172 |   |   |    |    |     |   |    |   |
| AF074965  | AGGTCCTTGTGGTCCAA  | CCACGGAGG      | CCCCCCCC | CACA      | ---   | C       | --- | --- | --- | AGCCC  | TGCTTT      | CGTTGTGGCAAGG   | TAGGACACTGGAGT  | CGGGACTG         | ---  | 1107 |   |   |    |    |     |   |    |   |
| Y14365    | AGGTCCTTGTGGTCCAA  | CCACGGAGG      | CCCCCCCC | CACA      | ---   | C       | --- | --- | --- | AGCCC  | TGCTTT      | CGTTTTTGGCAAGG  | TAGGACACTGGGT   | CGGGACTG         | ---  | 1172 |   |   |    |    |     |   |    |   |
| Y14570    | GGGTCCTCGTCTCCAA   | CCAGGAAAG      | CCCCG    | GCCACG    | ---   | C       | --- | --- | --- | AGCCC  | TGCTTC      | CGCTGCGGGAAAA   | CAGGGCATTGGAG   | CCGAGACTG        | ---  | 1169 |   |   |    |    |     |   |    |   |
| NC_001815 | GGGTCCTCGTCTCCAA   | CCAGGAAAG      | CCCCG    | GCCACG    | ---   | C       | --- | --- | --- | AGCCC  | TGCTTC      | CGCTGCGGGAAAA   | CAGGGCATTGGAG   | CCGAGACTG        | ---  | 1169 |   |   |    |    |     |   |    |   |
| U90557    | GGGTCCTCGTCTCCAA   | TCAGGAAAG      | CCCCG    | GCCACG    | ---   | C       | --- | --- | --- | AGCCC  | TG          | TTCCGCTGTGGAAA  | GGCAGGGCATTGGAG | CCGAGACTG        | ---  | 1168 |   |   |    |    |     |   |    |   |
| Y07616    | AAATACTGATGATACAG  | CCTAAAAAGACT   | TCC      | TCCCCGAAC | ---   | C       | --- | --- | --- | AGCCG  | TGCTTC      | CGCTGCGGGCAAG   | CGGGCCATTGGAG   | CAGGGACTG        | ---  | 1155 |   |   |    |    |     |   |    |   |
| AY217650  | AAATACTAATGATACAG  | CCTAAAAAGACT   | TCC      | TCCCCGAAC | ---   | C       | --- | --- | --- | AGCCA  | TGCTTC      | CGCTGCGGGCAGG   | CAGGTTCATTGGAG  | CAGAGACTG        | ---  | 1152 |   |   |    |    |     |   |    |   |
| AF517775  | AAATACTGATGATACAA  | CCTAAAAAGACT   | TCC      | TCCCCAAAC | ---   | C       | --- | --- | --- | AACCA  | TGCTTC      | CGCTGCGGGCAAG   | TAGGTTCATTGGAG  | CAGAGATTG        | ---  | 1151 |   |   |    |    |     |   |    |   |
| AY222339  | AAGTACTAATAATACAA  | CCTAAAAAGACT   | TCC      | TCCCCAAAC | ---   | C       | --- | --- | --- | AACCA  | TGTTTC      | CGCTGCGGACAAG   | TAGGTTCATTGGAG  | CAGAGATTG        | ---  | 1151 |   |   |    |    |     |   |    |   |
| NC_003323 | AAATACTAATGATACAA  | CCTAAAAAGACT   | TCC      | TCCCCAAAC | ---   | C       | --- | --- | --- | AACCA  | TGCTTC      | CGCTGTGGCAAG    | CAGGTTCATTGGAG  | CAGAGATTG        | ---  | 1152 |   |   |    |    |     |   |    |   |
| L36905    | AAGTGTTAGTTGTCCAG  | CCTAAAAAACCCCC | CCC      | AAAT      | ---   | C       | --- | --- | --- | AGCCG  | TGCTTC      | CGGTGCGGGAAAG   | CAGGCCACTGGAGT  | CGGGACTG         | ---  | 1157 |   |   |    |    |     |   |    |   |
| AF139170  | AAGTGTTAGTTGTCCAG  | CCTAAAAAACCCCC | CCC      | AAAT      | ---   | C       | --- | --- | --- | AGCCG  | TGCTTC      | CGGTGCGGGAAAG   | CAGGCCACTGGAGT  | CGGGACTG         | ---  | 1157 |   |   |    |    |     |   |    |   |
| AF042071  | AAGTGTTAGTTGTCCAG  | CCTAAAAAACCCCC | CCC      | AAAT      | ---   | C       | --- | --- | --- | AGCCG  | TGCTTC      | CGGTGCGGGAAAG   | CAGGCCACTGGAGT  | CGAGACTG         | ---  | 1157 |   |   |    |    |     |   |    |   |
| L03561    | AAGTGTTAGTTGTCCAG  | CCTAAAAAACCCCC | CCC      | AAAT      | ---   | C       | --- | --- | --- | AGCCG  | TGCTTC      | CGGTGCGGGAAAG   | CAGGCCACTGGAGT  | CGGGACTG         | ---  | 1157 |   |   |    |    |     |   |    |   |
| AF259264  | AAGTGTTAGTTGTCCAG  | CCTAAAAAACCCCC | CCC      | AAAT      | ---   | C       | --- | --- | --- | AGCCG  | TGCTTC      | CGGTGCGGGAAAG   | CAGGCCACTGGAGT  | CGGGACTG         | ---  | 1157 |   |   |    |    |     |   |    |   |
| AY563953  | AAGTGTTAGTTGTCCAG  | CCTAAAAAACCCCC | CCC      | AAAT      | ---   | C       | --- | --- | --- | AGCCG  | TGCTTC      | CGGTGCGGGAAAG   | CAGGCCACTGGAGT  | CGGGACTG         | ---  | 1157 |   |   |    |    |     |   |    |   |
| AY563954  | AAGTGTTAGTTGTCCAG  | CCTAAAAAACCCCC | CCC      | AAAT      | ---   | C       | --- | --- | --- | AGCCG  | TGCTTC      | CGGTGCGGGAAAG   | CAGGCCACTGGAGT  | CGGGACTG         | ---  | 1157 |   |   |    |    |     |   |    |   |
| U19949    | AAGTGTTAGTTGTCCAG  | CCTAAAAAACCCCC | CCC      | AAAT      | ---   | C       | --- | --- | --- | AGCCG  | TGCTTC      | CGGTGCGGGAAAG   | CAGGCCACTGGAGT  | CGGGACTG         | ---  | 1157 |   |   |    |    |     |   |    |   |
| J02029    | AAGTGTTAGTTGTCCAG  | CCTAAAAAACCCCC | CCC      | AAAT      | ---   | C       | --- | --- | --- | AGCCG  | TGCTTC      | CGGTGCGGGAAAG   | CAGGCCACTGGAGT  | CGGGACTG         | ---  | 1157 |   |   |    |    |     |   |    |   |
| D13748    | AAGTGTTAGTTGTCCAG  | CCTAAAAAACCCCC | CCC      | AAAT      | ---   | C       | --- | --- | --- | AGCCG  | TGCTTC      | CGGTGCGGGAAAG   | CAGGCCACTGGAGT  | CGGGACTG         | ---  | 1157 |   |   |    |    |     |   |    |   |
| AF033817  | AAGTGTTAGTTGTCCAG  | CCTAAAAAACCCCC | CCC      | AAAT      | ---   | C       | --- | --- | --- | AGCCG  | TGCTTC      | CGGTGCGGGAAAG   | CAGGCCACTGGAGT  | CGGGACTG         | ---  | 1157 |   |   |    |    |     |   |    |   |
| NC_001436 | AAGTGTTAGTTGTCCAG  | CCTAAAAAACCCCC | CCC      | AAAT      | ---   | C       | --- | --- | --- | AGCCG  | TGCTTC      | CGGTGCGGGAAAG   | CAGGCCACTGGAGT  | CGGGACTG         | ---  | 1157 |   |   |    |    |     |   |    |   |
| AF074966  | AAGTGTTAGTTGTCCAG  | CCTAAAAAACCCCC | CCC      | AAAT      | ---   | C       | --- | --- | --- | AGCCG  | TGCTTC      | CGGTGCGGGAAAG   | CAGGTTC         | ACTGGAGCCGAGACTG | ---  | 1157 |   |   |    |    |     |   |    |   |
| NC_000858 | AAGTGTTAGTTGTCCAG  | CCTAAAAAACCCCC | CCC      | AAAT      | ---   | C       | --- | --- | --- | AGCCG  | TGCTTC      | CGGTGCGGGAAAG   | CAGGTTC         | ACTGGAGCCGAGACTG | ---  | 1157 |   |   |    |    |     |   |    |   |
| L02534    | AGGTGTTAGTCTCCAG   | CCTAAAAAACCCCC | CCC      | AAAT      | ---   | C       | --- | --- | --- | AGCCG  | TGCTTC      | CGGTGCGGGAAAG   | CAGGCCACTGGAG   | CCGAGACTG        | ---  | 1162 |   |   |    |    |     |   |    |   |
| Z46900    | AAGTGCTAGTTATCCAG  | CCAAAAAACCCCC  | CCC      | AAAT      | ---   | C       | --- | --- | --- | AGCCA  | TGTTTC      | CGGTGCGGAAAAG   | CAGGCCACTGGAG   | CCGGGACTG        | ---  | 1156 |   |   |    |    |     |   |    |   |
| AY590142  | AGGTACTAGTAGTCCAG  | CCAAAAAGCCTCC  | CCC      | AAAT      | ---   | C       | --- | --- | --- | AACCT  | TGCTTC      | CGGATGCGGGAAAG  | CTGGCCATTGGAG   | CCGAGACTG        | ---  | 1199 |   |   |    |    |     |   |    |   |
| AF033818  | GGGCCCAAGATGCCCGGG | CCTCGGCAACCGG  | CCCC     | AAAAGGCC  | CCCC  | GGGACCA | --- | --- | --- | TGCTAT | CGATGCCTCAA | AAGAAGGCCATTGGG | CCCGGGACTGT     | ---              | 1182 |      |   |   |    |    |     |   |    |   |
| NC_001414 | GGGCCCAAGATGCCCGGG | CCTCGGCAACCGG  | CCCC     | AAAAGGCC  | CCCC  | GGGACCA | --- | --- | --- | TGCTAT | CGATGCCTCAA | AAGAAGGCCATTGGG | CCCGGGACTGT     | ---              | 1182 |      |   |   |    |    |     |   |    |   |
| K02120    | GGGCCCAAGATGCCCGGG | CCTCGGCAACCGG  | CCCC     | AAAAGGCC  | TCCCC | GGACCA  | --- | --- | --- | TGCTAT | CGATGCCTCAA | AAGAAGGCCATTGGG | CCCGGGATTGT     | ---              | 1179 |      |   |   |    |    |     |   |    |   |
| D00647    | GGGCCCAAGATGCCCGGG | CCTCGGCAACCGG  | CCCC     | AAAAGGCC  | CCCC  | GGGACCA | --- | --- | --- | TGCTAT | CGATGCCTCAA | AAGAAGGCCATTGGG | CCCGGGACTGT     | ---              | 1179 |      |   |   |    |    |     |   |    |   |
| AF257515  | GGGCCCAAGATGCCCGGG | CCCCGGCAACCGG  | CCCC     | AAAAGGCC  | CCCC  | AGGACCA | --- | --- | --- | TGCTAT | CGATGCCTCAA | AAGAAGGCCATTGGG | CCCGGGACTGT     | ---              | 1182 |      |   |   |    |    |     |   |    |   |

ruler .....1210.....1220.....1230.....1240.....1250.....1260.....1270.....1280.....1290.....1300

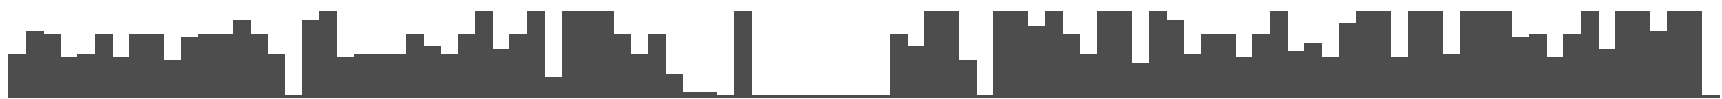

\*\* \* \* \*\* \* \*\* \* \*\* \* \*\* \* \*\* \* \* \* \*\* \* \*\* \* \* \*\* \* \*\* \* \*\* \* \*\* \* \*\* \* \*\* \*

M10060 --TACCCAG--CCAC--GCCCCCTCCTGGCCCCTGCCCCCTATGCCAAGATCCTTCTCACTGGAAAAGGGACTGCCACAACCTCAAACCCC--CTCAGGA-- 1265  
 NC\_001488 --TACCCAG--CCAC--GCCCCCTCCTGGCCCCTGCCCCCTATGCCAAGATCCTTCTCACTGGAAAAGGGACTGCCACAACCTCAAACCCC--CTCAGGA-- 1265  
 AF412314 --TACCCAG--CCAC--GCCCCCTCCTGGCCCCTGCCCCCTATGCCAAGATCCTTCTCACTGGAAAAGGGACTGCCACAACCTCAAACCCC--CTCAGGA-- 1265  
 AF139382 --TACCCAG--CCAC--GCCCCCTCCTGGCCCCTGCCCCCTATGCCAAGATCCTTCTCACTGGAAAAGGGACTGCCACAACCTCAAACCCC--CTCAGGA-- 1265  
 AF326584 --TACCCAG--CCAC--GCCCCCTCCTGGCCCCTGCCCCCTATGCCAAGAACCTTCTCACTGGAAAAGGGACTGCCACAACCTCAAACCCC--CTCAGGA-- 1265  
 AF326583 --TACCCAG--CCAC--GCCCCCTCCTGGCCCCTGCCCCCTATGCCAAGATCCTTCTCACTGGAAAAGGGACTGCCACAACCTCAAACCCC--CTCAGGA-- 1265  
 L20734 --CACCCAG--CCAC--GCCCCCTCCTGGCCCCTGCCCCCTATGCCAGGATCCTTCTCATTGGAAAAGGGACTGCCACAGCTTAAACCCC--CTCAGGA-- 1265  
 Y13051 --CACCCAG--CCAC--GCCCCCTCCTGGCCCCTGCCCCCTATGCCAAGATCCTTCTCATTGGAAAAGGGACTGCCACAGCTTAAACCCC--CTCAGGA-- 1265  
 L11456 --CACCCAG--CCAC--GCCCCCTCCTGGCCCCTGCCCCCTATGCCAGGATCCTTCTCACTGGAAAAGGGACTGCCACAGCTTAAACCCC--CTCAGGA-- 1265  
 X89270 --CACCCAG--CCAC--GCCCCCTCCTGGCCCCTGCCCCCTATGCCAGGATCCTTCTCACTGGAAAAGGGACTGCCACAACCCAAACCCC--CTCAGGA-- 1265  
 AF074965 --CACCCAG--CCAC--GCCCCCTCCTGGCCCCTGCCCCCTATGCCAGGATCCTTCTCACTGGAAAAGGGACTGCCACAGCTTAAACCCC--CTCAGGA-- 1200  
 Y14365 --CACCCAG--CCAC--GCCCCCTCCTGGCCCCTGCCCCCTATGCCAAGATCCTTCTCACTGGAAAAGAGACTGCCACAGCTTAAACCCC--CTCAGGA-- 1265  
 Y14570 --CACCCAG--CCAC--GCCCCCTCCTGGCCCCTGCCCCCTATGCCAAGATCCTTCTCACTGGAAAAGAGACTGCCACAGCTTAAACCCC--CTCAGGA-- 1262  
 NC\_001815 --CACCCAG--CCAC--GCCCCCTCCTGGCCCCTGCCCCCTATGCCAAGATCCTTCTCACTGGAAAAGAGACTGCCACAGCTTAAACCCC--CTCAGGA-- 1262  
 U90557 --CACCCAG--CCAC--GCCCCCTCCTGGCCCCTGCCCCCTATGCCAAGATCCTTCTCACTGGAAAAGAGACTGCCACAGCTTAAACCCC--CTCAGGA-- 1261  
 Y07616 --TAAACAG--CCCC--GGCCCCCTCCAGGCCCTTGCCCCCTATGCCAGGATCCCGCCCCTGGAAGCGGGACTGCCACAGTTAAAAGCGGACACCAA-- 1248  
 AY217650 --TAAACAG--CCCC--GGCCCCCTCCAGGCCCTTGCCCCCTATGCCAGGATCCCGCCCCTGGAAGCGGGACTGCCACAGTTAAAAGCGAGACACCAA-- 1245  
 AF517775 --TAAACAG--CCTC--GGCCCCCTCCAGGCCCTTGCCCCCTATGTCAGGACCCCGCCCCTGGAAGCGGGACTGTCACAAATTAATAAGCAGACACCAA-- 1244  
 AY22339 --TAAACAG--CCTC--GGCCCCCTCCAGGCCCTTGCCCCCTATGTCAGGACCCCGCCCCTGGAAGCGGGACTGTCACAAATTAATAAGCAGACACCAA-- 1244  
 NC\_003323 --TAAACAG--CCCC--GACCCCCCTCCGGGCCCTGCCCCCTATGTCAGGACCCCGCCCCTGGAAGCGGGACTGCCACAGTTAAAAGCAGATACCAA-- 1245  
 L36905 --CACTCAG--CCTC--GTCCCCCCCCGGGCCATGCCCCCTATGTCAAGACCCAACCTCACTGGAAGCGAGACTGCCCCCCGCTAAAAGCCCCTATCCCAG 1252  
 AF139170 --CACTCAG--CCTC--GTCCCCCCCCGGGCCATGCCCCCTATGTCAAGACCCAACCTCACTGGAAGCGAGACTGCCCCCCGCTAAAAGCCCCTATCCCAG 1252  
 AF042071 --CACTCAG--CCTC--GTCCCCCCCCGGGCCATGCCCCCTATGTCAAGACCCAACCTCACTGGAAGCGAGACTGCCCCCCGCTAAAAGCCCCTATCCCAG 1252  
 L03561 --CACTCAG--CCTC--GTCCCCCCCCGGGCCATGCCCCCTATGTCAAGACCCAACCTCACTGGAAGCGAGACTGCCCCCCGCTAAAAGCCCCTATCCCAG 1252  
 AF259264 --CACTCAG--CCTC--GTCCCCCCCCGGGCCATGCCCCCTATGTCAAGACCCAACCTCACTGGAAGCGAGACTGCCCCCCGCTAAAAGCCCCTATCCCAG 1252  
 AY563953 --CACTCAG--CCTC--GTCCCCCCCCGGGCCATGCCCCCTATGTCAAGACCCAACCTCACTGGAAGCGAGACTGCCCCCCGCTAAAAGCCCCTATCCCAG 1252  
 AY563954 --CACTCAG--CCTC--GTCCCCCCCCGGGCCATGCCCCCTATGTCAAGACCCAACCTCACTGGAAGCGAGACTGCCCCCCGCTAAAAGCCCCTATCCCAG 1252  
 U19949 --CACTCAG--CCTC--GTCCCCCCCCGGGCCATGCCCCCTATGTCAAGACCCAACCTCACTGGAAGCGAGACTGCCCCCCGCTAAAAGCCCCTATCCCAG 1252  
 J02029 --CACTCAG--CCTC--GTCCCCCCCCGGGCCATGCCCCCTATGTCAAGACCCAACCTCACTGGAAGCGAGACTGCCCCCCGCTAAAAGCCCCTATCCCAG 1252  
 D13748 --CACTCAG--CCTC--GTCCCCCCCCGGGCCATGCCCCCTATGTCAAGACCCAACCTCACTGGAAGCGAGACTGCCCCCCGCTAAAAGCCCCTATCCCAG 1252  
 AF033817 --CACTCAG--CCTC--GTCCCCCCCCGGGCCATGCCCCCTATGTCAAGACCCAACCTCACTGGAAGCGAGACTGCCCCCCGCTAAAAGCCCCTATCCCAG 1252  
 NC\_001436 --CACTCAG--CCTC--GTCCCCCCCCGGGCCATGCCCCCTATGTCAAGACCCAACCTCACTGGAAGCGAGACTGCCCCCCGCTAAAAGCCCCTATCCCAG 1252  
 AF074966 --CACTCAG--CCTC--GTCCCCCCCCGGGCCATGCCCCCTATGTCAAGACCCAACCTCACTGGAAGCGAGACTGCCCCCCGCTAAAAGCCCCTATCCCAG 1249  
 NC\_000858 --CACTCAG--CCTC--GTCCCCCCCCGGGCCATGCCCCCTATGTCAAGACCCAACCTCACTGGAAGCGAGACTGCCCCCCGCTAAAAGCCCCTATCCCAG 1249  
 L02534 --CGCTCAG--CCTC--GTCCCCCCCCGGGCCATGCCCCCTATGTCAAGACCCAACCTCACTGGAAGCGGGACTGTCCTCGCCTAAAAGCCCCTATCCCAG 1257  
 Z46900 --CACTCAA--CCTC--GTCCCCCCCCGGGCCATGCCCCCTATGTCAAGACCCAACCTCACTGGAAGCGGGACTGTCCTCGCCTAAAAGCCCCTATCCCAG 1251  
 AY590142 --CACCCAG--CCTC--GCCCCCTCCTGGCCCCTGCCCCCTATGCCAAGATCCTTCTCACTGGAAAAGGGACTGCCACAACCTCAAACCCC--CTCAGGA-- 1292  
 AF033818 CCCACCAAGACCACCGGCCCCCTCCGGGACCTTGTCCCATATGTAAAAGATCCTTCCCATTTGGAAAAGGGACTGTCCAACCCCTCAAATCAAAAAACTAA-- 1281  
 NC\_001414 CCCACCAAGACCACCGGCCCCCTCCGGGACCTTGTCCCATATGTAAAAGATCCTTCCCATTTGGAAAAGGGACTGTCCAACCCCTCAAATCAAAAAACTAA-- 1281  
 K02120 CCTACCAAGGCCACCGGCCCCCTCCGGGACCTTGTCCCATATGTAAAAGATCCTTCCCATTTGGAAAAGGGACTGTCCAACCCCTCAAATCAAAAAACTAA-- 1278  
 D00647 CCCACCAAAACCACCGGCCCCCTCCGGGACCTTGTCCCATATGTAAAAGATCCTTCCCATTTGGAAAAGGGACTGTCCAACCCCTCAAATCAAAAAACTAA-- 1278  
 AF257515 CCCACCAAGACCACCGGCCCCCTCCGGGACCTTGTCCCATATGTAAAAGATCCTTCCCATTTGGAAAAGGGACTGTCCAACCCCTCAAATCAAAAAACTAA-- 1281

ruler .....1310.....1320.....1330.....1340.....1350.....1360.....1370.....1380.....1390.....1400

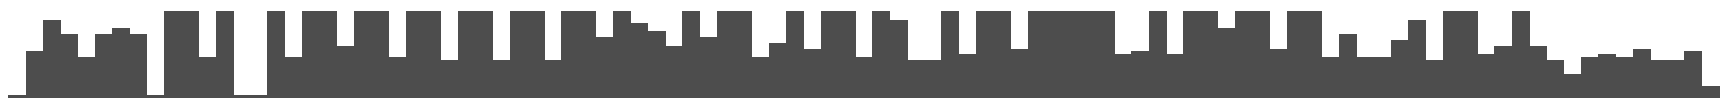



```

      *      *      *      *      **      *      *      **
M10060 -----GGAAGGGGAACCCCTCCTGTTGGATCTCCCTTCC-----ACCTCAGGCCTACTGAGGAAAAAACTC-CTTAAGGGGGGAGATCTAATCTC 1351
NC_001488 -----GGAAGGGGAACCCCTCCTGTTGGATCTCCCTTCC-----ACCTCAGGCCTACTGAGGAAAAAACTC-CTTAAGGGGGGAGATCTAATCTC 1351
AF412314 -----GGAAGGGGAACCCCTCCTGTTGGATCTCCCTTCC-----ACCTCAGGCCTACTGAGGAAAAAACTC-CTTAAGGGGGGAGATCTAATCTC 1351
AF139382 -----GGAAGGGGAACCCCTCCTGTTGGATCTCTCTTCC-----ACCTCAGGCATTACTGAGGAAAAAACTC-CTTAGGGGGGGAGATCTAATCTC 1351
AF326584 -----GGAAGGGGAACCCCTCCTGTTGGATCTCCCTTCC-----ACCTCAGGCCTACTGAGGAAAAAACTC-CTTAAGGGGGGAGATCTAATCTC 1351
AF326583 -----GGAAGGGGAACCCCTCCTGTTGGATCTCTCTTCC-----ACCTCAGGCCTACTGAGGAAAAAACTC-CTTAGGGGGGGGAGATCTAATCTC 1351
L20734 -----GGAAGGGGAACCCCTCCTGTTGGATCTCTCCTCC-----ACCTCAGGTACTACTGAGGAAAAAACTC-CTTAGGGGGGGGAGATCTAATCTC 1351
Y13051 -----GGAAGGGGAACCCCTCCTGTTGGATCTCTCCTCC-----ACCTCAGGTACTACTGAGGAAAAAACTC-CTTAGGGGGGGGAGATCTAATCTC 1351
L11456 -----GGAAGGGGAACCCCTCCTGTTGGATCTCTCCTCC-----ACCTCAGGTACTACTGAGGAAAAAACTC-CTTAGGGGGGGGAGATCTAATCTC 1351
X89270 -----GGAAGGGGAACCCCTCCTGTTGGATCTCTCCTCC-----ACCTCAGGCCTACTGAGGAAAAAACTC-CTTAAGGGGGGAGATCTAATCTC 1351
AF074965 -----GGAAGGGGAACCCCTCCTGTTGGATCTCTCCTCC-----ACCTCAGGTACTACTGAGGAAAAAACTC-CTTAGGGGGGGGAGATCTAATCTC 1286
Y14365 -----GGAAGGGGAACCCCTCCTGTTAGATCTCTCCTCC-----ACCTCAAATACTACTGAGGAAAAAACTC-CTTGGGGGGGGGAGATCTAATCTC 1351
Y14570 -----GGAGGAGGAACCCCTCCTGCTGGACCTGCCCTCG--GATGCCAT-TGCCACCGAGGAAAAAACTC-CCTGGGGGGGGGAGATGTAATCTC 1348
NC_001815 -----GGAGGAGGAACCCCTCCTGCTGGACCTGCCCTCG--GATGCCAT-TGCCACCAGGAAAAAACTC-CCTGGGGGGGGGAGATGTAATCTC 1348
U90557 -----GGAGGAGGAACCCCTCCTGCTGGACCTGCCCTCA--GATGCCGT-TGCCACCAGGAAAAAACTC-CCTAGGGGGGGGAGATCTAATCTC 1347
Y07616 -----GGGCAACGAAAACCTACTCCTAGACTTGCCCTGTGAAACATCCAATGCCCGGGAGCGAAAAAACTC-CTCGGGGGGGGAGGACTAACCTC 1337
AY217650 -----AGGCAACGAAAACCTACTTCTAGACTTGCCCTGTGAAACCTCCAATGCCCGGGAGCGAAAAAACTC-CTCGGGGGGGGAGGACTAACCTC 1334
AF517775 -----AGGCAGTGAAGACCTACTCTTAGACCTGCCCTGTGAGGCACCCAACGCCCGGGAGCGAAAAAACTC-CTCGGGGGGGGAGGACTAACCTC 1333
AY22339 -----AGGCAGTGAAGACCTACTCTTAGACCTACCCTGTGAAAGCACCCGACGTCCGGGAGCAAAAAAACTC-CTCGGGGGGGGAGGACTAACCTC 1333
NC_003323 -----AGGCAGTGAAGACCTACTCCTAGACCTGCCCTGTGAAAGCTCCCATGTCCGGAGCAAAAAAACTC-CTCAGGGGGGGGAGGACTAACCTC 1334
L36905 AACCAGAGCCAGAGGAAGATGCCCTCCTATTAGACCTCCCCACT--GACATCCCACACCC-----AAAAAACTC-CATAGGGGGGGGAGGTTTAACTC 1342
AF139170 AACCAGAGCCAGAGGAAGATGCCCTCCTATTAGACCTCCCCACT--GACATCCCACACCC-----AAAAAACTC-CATAGGGGGGGG----- 1330
AF042071 AACCAGAGCCAGAGGAAGATGCCCTCCTATTAGACCTCCCCACT--GACATCCCACACCC-----AAAAAACTC-CATAGGGGGGGGAGGTTTAACTC 1342
L03561 AACCAGAGCCAGAGGAAGATGCCCTCCTATTAGACCTCCCCGCT--GACATCCCACACCC-----AAAAAACTC-CATAGGGGGGGGAGGTTTAACTC 1342
AF259264 AACCAGAGCCAGAGGAAGATGCCCTCCTATTAGACCTCCCCGCT--GACATCCCACACCC-----AAAAAACTC-CATAGGGGGGGGAGGTTTAACTC 1342
AY563953 AACCAGAGCCAGAGGAAGATGCCCTCCTATTAGACCTCCCCGCT--GACATCCCACACCC-----AAAAAACTC-CATAGGGGGGGGAGGTTTAACTC 1342
AY563954 AACCAGAGCCAGAGGAAGATGCCCTCCTATTAGACCTCCCCGCT--GACATCCCACACCC-----AAAAAACTC-CATAGGGGGGGGAGGTTTAACTC 1342
U19949 AACCAGAGCCAGAGGAAGATGCCCTCCTATTAGACCTCCCCGCT--GACATCCCACACCC-----AAAAAACTC-CATAGGGGGGGGAGGTTTAACTC 1342
J02029 AACCAGAGCCAGAGGAAGATGCCCTCCTATTAGACCTCCCCGCT--GACATCCCACACCC-----AAAAAACTT-CATAGGGGGGGGAGGTTTAACTC 1342
D13748 AACCAGAGCCAGAGGAGGATGCCCTCCTATTAGATCTCCCCGCC--GACATCCCACACCC-----AAAAAACTC-CATAGGGGGGGGAGGTTTAACTC 1342
AF033817 AACCAGAGCCAGAGGAGGATGCCCTCCTATTAGATCTCCCCGCC--GACATCCCACACCC-----AAAAAACTC-CATAGGGGGGGGAGGTTTAACTC 1342
NC_001436 AACCAGAGCCAGAGGAGGATGCCCTCCTATTAGATCTCCCCGCC--GACATCCCACACCC-----AAAAAACTC-CATAGGGGGGGGAGGTTTAACTC 1342
AF074966 ACCCAGAGCCAGAGGAGGATGCCCTCCTATTAGACCTCCCCACT--GACATCCCACACCC-----AAAAAACTC-CATAGGGGGGGGAGGCTAACCCTC 1339
NC_000858 ACCCAGAGCCAGAGGAGGATGCCCTCCTATTAGACCTCCCCACT--GACATCCCACACCC-----AAAAAACTC-CATAGGGGGGGGAGGCTAACCCTC 1339
L02534 AACCAGAGCCAGAGGAAGATGCCCTCCTACTAGACCTCCCCGCT--GACATCCCGCATCC-----AAAAAACTC-CATAGGGGGGGGAGGTTTAACTC 1347
Z46900 AACCAGAGCCAGAAGAAGACGCCCTCCTATTAGACCTCCCCACT--GACATCCCACACCC-----AAAAAACTC-CATAGGGGGGGGAGGCTAACCCTC 1341
AY590142 ----AGAGCCAGAGGAGGAAGCCCTTCTACTAGACCTCCCTGCG--GATGTGTCTTACCA-----AAAAAACTT-GATAGGGGGGGGAGGCTTAACTC 1378
AF033818 -----TAGAGGGGGGGAC-----TTAGCGCCCCCAA-----CCGTAACCCCTAT-----AACAGATCCTCTTAGTGAGGCCGAATTAGAATG 1354
NC_001414 -----TAGAGGGGGGGAC-----TTAGCGCCCCCAA-----CCGTAACCCCTAT-----AACAGATCCTCTTAGTGAGGCCGAATTAGAATG 1354
K02120 -----TAGAGGGGGGGAC-----TTAGCGCCCCCAA-----CCATAACACCTAT-----AACGGATTCTCTTAGTGAGGCCGAATTAGAATG 1351
D00647 -----TAGAGGGGGGGAC-----CTAGCGCCCCCAA-----TCATAACACCTAT-----AACAGATTCTCTCAGTGAGGCCGAATTAGAATG 1351
AF257515 -----TAGAGGGGGGGAC-----TAAGCGCCCCCAA-----CTACAACACCTAT-----AACAGATTCTCTTAGTGAGGCCGAATTAGAATG 1354
ruler .....1410.....1420.....1430.....1440.....1450.....1460.....1470.....1480.....1490.....1500

```

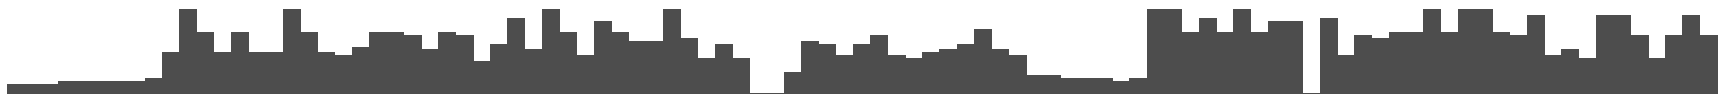

| Accession | Sequence                                                                                                      | Position |
|-----------|---------------------------------------------------------------------------------------------------------------|----------|
| M10060    | CCCCCA---TCCCGAT---CAAGAC---ATCT-----CGATACTCCCACATCATCCCCCTGCGGCAGCAACAGCAACCAATT---CTAGGG                   | 1424     |
| NC_001488 | CCCCCA---TCCCGAT---CAAGAC---ATCT-----CGATACTCCCACATCATCCCCCTGCGGCAGCAACAGCAACCAATT---CTAGGG                   | 1424     |
| AF412314  | CCCCCA---TCCCGAT---CAAGAC---ATCT-----CGATACTCCCACATCATCCCCCTGCGGCAGCAACAGCAACCAATT---CTAGGG                   | 1424     |
| AF139382  | CCCCCA---TCCCGAT---CAAGAC---ATCT-----CGATACTCCCACATCATCCCCCTGCGGCAGCAACCAACCAACCAATT---CTAGGG                 | 1424     |
| AF326584  | CCCCCA---TCCCGAT---CAAGAC---ATCT-----CGATACTCCCACATCATCCCCCTGCGGCAGCAACCAACCAACCAATT---CTAGGG                 | 1424     |
| AF326583  | CCCCCA---TCCCGAT---CAAGAC---ATCT-----CGATACTCCCACATCATCCCCCTGCGGCAGCAACAGCAACCAATT---CTAGGG                   | 1424     |
| L20734    | CCCCCA---TCCCGAT---CAAGAC---ATCT-----CAATACTCCCACATCATCCCCCTGCGGCAACAACAACAACCAATT---CTAGGA                   | 1424     |
| Y13051    | CCCCCA---TCCCGAT---CAAGAC---ATCT-----CAATACTCCCACATCATCCCCCTGCGGCAACAACAACAACCAATT---CTAGGA                   | 1424     |
| L11456    | CCCCCA---TCCCGAT---CAAGAC---ATCT-----CAATACTCCCACATCATCCCCCTGCGGCAACAACAACAACCAATT---CTAGGA                   | 1424     |
| X89270    | CCCCCA---TCCCGAT---CAAGAC---ATCT-----CAATACTCCCACATCGTTCCCTGCGGCAACAACAACAACCAATT---CTAGGA                    | 1424     |
| AF074965  | CCCCCA---TCCCGAT---CAAGAC---ATCT-----CAATACTCCCACATCATCCCCCTGCGGCAACAACAACAACCAATT---CTAGGA                   | 1359     |
| Y14365    | CCCCCA---TCCCGAT---AAAAAC---TTCT-----CAATACTCCCACATCATCCCCCTGCGAGCAGCAACAACAACCGATT---CTAGGG                  | 1424     |
| Y14570    | CCCCC-----AACAA---ATCT-----CAATGCTCCCTGTCATTCCGTTAGAGCAACAGCACCAGCCCCTT---CTAGAC                              | 1412     |
| NC_001815 | CCCCC-----AACAA---ATCT-----CAATGCTCCCTGTCATTCCGTTAGAGCAACAGCACCAGCCCCTT---CTAGAC                              | 1412     |
| U90557    | CCCCC-----AACAA---ATCT-----CACTGCTCCCTCTCATTCTTTAGAGCAACAGCAGCAGCCCCTT---CTAGAC                               | 1411     |
| Y07616    | CCCCC-----GA---ACC-----GTACTACCTCTTATGCCTTTTGTCTCAACAGAAACAGCCTATC---TTGCAT                                   | 1395     |
| AY217650  | CCCCC-----GA---ACC-----ATACTACCTCTGATACCTTTTGTCTCAACAAAAACAGCCTATC---TTGCAT                                   | 1392     |
| AF517775  | CCCCC-----GA---ACC-----ATACTACCCCTGATACCTTTTGTCCAGAGAGAAGCAGCCTATC---CTGCAT                                   | 1391     |
| AY22339   | CCCCC-----GA---ACC-----ATACTACCCCTTATACCTCTGTCCCAACAGAAACAGCCTATT---CTACAT                                    | 1391     |
| NC_003323 | CCCCC-----GA---ACC-----ATACTACCCCTCATAACCCTTGTCCCAACAAAGGCAACCTATC---CTACAT                                   | 1392     |
| L36905    | CCCCC---CCACATTACAGCAA---GTCCTTCCTAACCAAGACCCAGCATCTATTCTGCCAGTTATACCATTAGATCCCGCCCGTGGCCCGTAATTA---AA        | 1436     |
| AF139170  | CCCCC---CCACATTACAGCAA---GTCCTTCCTAACCAAGACCCAGCATCTATTCTGCCAGTTATACCATTAGATCCCGCCCGTGGCCCGTAATTA---AA        | 1424     |
| AF042071  | CCCCC---CCACATTACAGCAA---GTCCTTCCTAACCAAGACCCAGCATCTATTCTGCCAGTTATACCATTAGATCCCGCCCGTGGCCCGTAATTA---AA        | 1436     |
| L03561    | CCCCC---CCACATTACAGCAA---GTCCTTCCTAACCAAGACCCAGCATCTATTCTGCCAGTTATACCATTAGATCCCGCCCGTGGCCCGTAATTA---AA        | 1436     |
| AF259264  | CCCCC---CCACATTACGGCAA---GTCCTTCCTAACCAAGACCCAGCATCTATTCTGCCAGTTATACCATTAGATCCCGCCCGTGGCCCGTAATTA---AA        | 1436     |
| AY563953  | CCCCC---CCACATTACAGCAA---GTCCTTCCTAACCAAGACCAAGCATCTATTCTGCCAGTTATACCATTAGATCCCGCCCGTGGCCCTTAATTA---AA        | 1436     |
| AY563954  | CCCCC---CCACATTACAGCAA---GTCCTTCCTAACCAAGACCAAGCATCTATTCTGCCAGTTATACCATTAGATCCCGCCCGTGGCCCTTAATTA---AA        | 1436     |
| U19949    | CCCCC---CCACATTACAGCAA---GTCCTTCCTAACCAAGACCCAGCATCTATTCTGCCAGTTATACCATTAGATCCCGCCCGTGGCCCGTAATTA---AA        | 1436     |
| J02029    | CCCCC---CCACATTACAGCAA---GTCCTTCCTAACCAAGACCCAGCATCTATTCTGCCAGTTATACCATTAGATCCCGCCCGTGGCCCGTAATTA---AA        | 1436     |
| D13748    | CCCCC---CCACATTACAGCAA---GTCCTTCCTAACCAAGACCAACATCTATTCTGCCAGTTATACCATTAGATCCCGCCCGTGGCCCGTAATTA---AA         | 1436     |
| AF033817  | CCCCC---CCACATTACAGCAA---GTCCTTCCTAACCAAGACCAACATCTATTCTGCCAGTTATACCATTAGATCCCGCCCGTGGCCCGTAATTA---AA         | 1436     |
| NC_001436 | CCCCC---CCACATTACAGCAA---GTCCTTCCTAACCAAGACCAACATCTATTCTGCCAGTTATACCATTAGATCCCGCCCGTGGCCCGTAATTA---AA         | 1436     |
| AF074966  | CCCCC---CCACATTACGGCAA---GTCCTTCCTAACCAAGGCCCGGCATCTATTCTGCCAGTTATACCATTAGATCCCGCCCGCGGCCATAATTA---AG         | 1433     |
| NC_000858 | CCCCC---CCACATTACGGCAA---GTCCTTCCTAACCAAGGCCCGGCATCTATTCTGCCAGTTATACCATTAGATCCCGCCCGCGGCCATAATTA---AG         | 1433     |
| L02534    | CCCCC---CCACGTTGCAGCAA---GTCCATCCGAATAAAGACCCGGCATCCATTCTACCAGTTATACCATTAGATCCCGCCCGGGCCCTTAATTA---AG         | 1441     |
| Z46900    | CCCCC---TCACGTCACGGCAG---GACCATTCCAACGGAGACCCAGCACATATTCTGCCAGTAATACCATTAGATCCCGCCCGGGCG---CCCCTAATTA---AG    | 1434     |
| AY590142  | CCCCC---AACCAGAAAT---CGGCCGTGCCCGTCT---CCG---GACCCGCCA---CCATTTTGCCAGTTATACCATTGGACCCTAAACAGCGGCCTTAATTA---AG | 1469     |
| AF033818  | CC-----TACTTTCTATTCTCTGGCTCGCAGCCGTCCCTCCGTGGCTGTAT                                                           | 1401     |
| NC_001414 | CC-----TACTTTCTATTCTCTGGCTCGCAGCCGTCCCTCCGTGGCTGTAT                                                           | 1401     |
| K02120    | CT-----TACTTTCTATTCTCTGGCTCGCAGCCGTCCCTCCGTGGCTGTAT                                                           | 1398     |
| D00647    | CT-----TACTTTCTATTCTCTGGCTCGCAGCCGTCCCTCCGTGGCTGTAT                                                           | 1398     |
| AF257515  | CC-----TACTTTCCATTCTCTGGCCCGCAGCCGCCCTCCGTGGCTGTAT                                                            | 1401     |

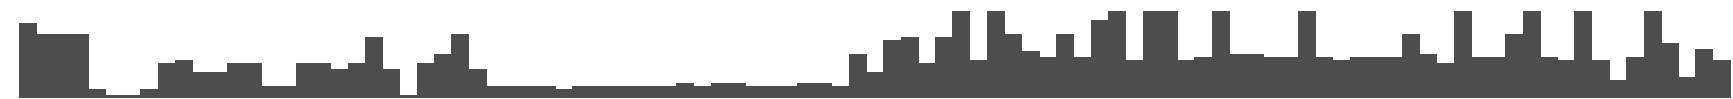



|           |                                                                                            |      |         |                     |             |         |                   |               |            |             |      |   |   |  |   |    |  |   |   |  |  |
|-----------|--------------------------------------------------------------------------------------------|------|---------|---------------------|-------------|---------|-------------------|---------------|------------|-------------|------|---|---|--|---|----|--|---|---|--|--|
|           |                                                                                            |      |         | *                   |             | *       |                   | *             | *          | **          | **   | * | * |  | * | ** |  | * | * |  |  |
| M10060    | GTGCCCGGGCCGGTA-AAGC-TCCACGA                                                               | ---  | CACCC   | TGATCCTAGGC         | GCCAGTGGG   | CAAA    | CCAAC             | ACCCAGTTCAAAC | TCCTCCAAAC | CCCCCTACACA | 1608 |   |   |  |   |    |  |   |   |  |  |
| NC_001488 | GTGCCCGGGCCGGTA-AAGC-TCCACGA                                                               | ---  | CACCC   | TGATCCTAGGC         | GCCAGTGGG   | CAAA    | CCAAC             | ACCCAGTTCAAAC | TCCTCCAAAC | CCCCCTACACA | 1608 |   |   |  |   |    |  |   |   |  |  |
| AF412314  | GTGCCCGGGCCGGTA-AAGC-TCCACGA                                                               | ---  | CACCC   | TGATCCTAGGC         | GCCAGTGGG   | CAAA    | CCAAC             | ACCCAGTTCAAAC | TCCTCCAAAC | CCCCCTACACA | 1608 |   |   |  |   |    |  |   |   |  |  |
| AF139382  | GTGCCCGGGCCGGTA-AAGC-TCCACGA                                                               | ---  | CACCC   | TGGTCTTAGGC         | GCCAGTGGG   | CAAA    | CCAAT             | ACCCAGTTCAAAC | TCCTCCAAAC | CCCCCTACACA | 1608 |   |   |  |   |    |  |   |   |  |  |
| AF326584  | GTGCCCGGGCCGGTA-AAGC-TCCACGA                                                               | ---  | CACCC   | TGATCCTAGGC         | GCCAGTGGG   | CAAA    | CCAAC             | ACCCAGTTCAAAC | TCCTCCAAAC | CCCCCTACACA | 1608 |   |   |  |   |    |  |   |   |  |  |
| AF326583  | GTGCCCGGGCCGGTA-AAGC-TCCACGA                                                               | ---  | CACCC   | TGGTCTTAGGC         | GCCAGTGGG   | CAAA    | CCAAT             | ACCCAGTTCAAAC | TCCTCCAAAC | CCCCCTACACA | 1608 |   |   |  |   |    |  |   |   |  |  |
| L20734    | GTGCCTGGGCCGGTA-AAGC-TCCACGA                                                               | ---  | CACCC   | TGGTCTTAGGC         | GCCAGTGGG   | CAAA    | CTAAT             | ACCCAGTTCAAAC | TCCTCCAAAC | CCCCCTACACA | 1608 |   |   |  |   |    |  |   |   |  |  |
| Y13051    | GTGCCTGGGCCGGTA-AAGC-TCCACGA                                                               | ---  | CACCC   | TGGTCTTAGGC         | GCCAGTGGG   | CAAA    | CTAAT             | ACCCAGTTCAAAC | TCCTCCAAAC | CCCCCTACACA | 1608 |   |   |  |   |    |  |   |   |  |  |
| L11456    | GTGCCTGGGCCGGTA-AAGC-TCCACGA                                                               | ---  | CACCC   | TGGTCTTAGGC         | GCCAGTGGG   | CAAA    | CTAAT             | ACCCAGTTCAAAC | TCCTCCAAAC | CCCCCTACACA | 1608 |   |   |  |   |    |  |   |   |  |  |
| X89270    | GTGCCTGGGCCGGTA-AAGC-TCCACGA                                                               | ---  | CACCC   | TGGTCTTAGGC         | GCCAGTGGG   | CAAA    | CTAAT             | ACCCAGTTCAAAC | TCCTCCAAAC | CCCCCTACACA | 1608 |   |   |  |   |    |  |   |   |  |  |
| AF074965  | GTGCCTGGGCCGGTA-AAAC-TCCACGA                                                               | ---  | CACCC   | TGGTCTTAGGC         | GCCAGTGGG   | CAAA    | CTAAT             | ACCCAGTTCAAAC | TCCTCCAAAC | CCCCCTACACA | 1543 |   |   |  |   |    |  |   |   |  |  |
| Y14365    | GTGCCTGGGCCGGTA-AAGC-TCCACGA                                                               | ---  | CACCC   | AAGTCTTGGG          | GCCAGTGGG   | CAAA    | CTAAC             | ACCCAGTTCAAAC | TCCTCCAAAC | CCCCCTACACA | 1608 |   |   |  |   |    |  |   |   |  |  |
| Y14570    | GCCCCGAGTCAGTA--AGTGTTCCTGA                                                                | ---  | TACAAC  | GGTTCCTGGG          | GCTGGCGGAC  | GAGACC  | AGCTCCC           | AGTTCAAAC     | TCCTTCAAT  | CCCCCTGTGCG | 1596 |   |   |  |   |    |  |   |   |  |  |
| NC_001815 | GCCCCGAGTCAGTA--AGTGTTCCTGA                                                                | ---  | TACAAC  | GGTTCCTGGG          | GCTGGCGGAC  | GAGACC  | AGCTCCC           | AGTTCAAAC     | TCCTTCAAT  | CCCCCTGTGCG | 1596 |   |   |  |   |    |  |   |   |  |  |
| U90557    | GCCCCGAGTCAGAA--GGT--CTCTGA                                                                | ---  | CACAAC  | GGTTCCTAGG          | GCTGGCGGT   | CAGACC  | AGCTCCC           | AGTTCAAAC     | TCCTCCGAT  | CCCCCTGTGCG | 1593 |   |   |  |   |    |  |   |   |  |  |
| Y07616    | GTGCCCTC--CGATTCCAACCTCCAGGA                                                               | ---  | CACCACC | TCTTAGGC            | GCCAGGCGGAC | CAAGCGC | CAACAAGTTAAGAT    | TCCTGCCT      | CATCCC     | CGTCCATA    | 1579 |   |   |  |   |    |  |   |   |  |  |
| AY217650  | GTGCCCTC--CGATTCCAACCTCCAGGA                                                               | ---  | CACCACC | TCTTAGGC            | GCCAGGCGGAC | CAAGTG  | CAACAAGTTAAGG     | TCCTGCC       | CATCCC     | CGTCCATA    | 1576 |   |   |  |   |    |  |   |   |  |  |
| AF517775  | GTGCCCTC--CTGACTCTAATCTCCAGGA                                                              | ---  | CACCAC  | TGTCTTAGGT          | GCCAGGCGGAC | CAAGTG  | CTAACAAAGTTCAAGAT | TCTGCC        | CGTCCC     | CGTCCATA    | 1575 |   |   |  |   |    |  |   |   |  |  |
| AY22339   | GTGCCCTC--CTGACTCCAACCTCCAGGA                                                              | ---  | TACCAC  | TCTTAGGT            | GCCAGGCGGAC | CAAGTG  | CAACAAGTTCAAAAT   | TCTACC        | CGTCCC     | CGTCCATA    | 1575 |   |   |  |   |    |  |   |   |  |  |
| NC_003323 | GTGCCCTC--CTGACTCCAACCTCCAGGA                                                              | ---  | CACCAC  | TGTCTTAGGC          | GCCAGGCGGAC | CAAGTG  | CAACAAGTTAAGAT    | TCCTGC        | CTCC       | CGTCCATA    | 1576 |   |   |  |   |    |  |   |   |  |  |
| L36905    | GTTCTCAAG--TAATACTCCCCCTCAGAAA                                                             | ---  | TACAT   | CCGTATTAGGGG        | CAGGGGG     | CAAA    | CCAAGATCACTTTAAG  | CTCACCT       | CCCTT      | CCTGTACTAA  | 1620 |   |   |  |   |    |  |   |   |  |  |
| AF139170  | GTTCTCAAG--TAATACTCCCCCTCAAAAA                                                             | ---  | TACAT   | CCGTATTAGGGG        | CAGGGGG     | CAAA    | CCAAGATCACTTTAAG  | CTCACCT       | CCCTT      | CCTGTGCTAA  | 1608 |   |   |  |   |    |  |   |   |  |  |
| AF042071  | GTTCTCAAG--TAATACTCCCCCTCAAAAA                                                             | ---  | TACAT   | CCGTATTAGGGG        | CAGGGGG     | CAAA    | CCAAGATCACTTTAAG  | CTCACCT       | CCCTT      | CCTGTGCTAA  | 1620 |   |   |  |   |    |  |   |   |  |  |
| L03561    | GTTCTCAAG--TAATACTCCCCCTCAAAAA                                                             | ---  | TACAT   | CCGTATTAGGGG        | CAGGGGG     | CAAA    | CCAAGATCACTTTAAG  | CTCACCT       | CCCTT      | CCTGTGCTAA  | 1620 |   |   |  |   |    |  |   |   |  |  |
| AF259264  | GTTCTCAAG--TAATACTCCCCCTCAAAAA                                                             | ---  | TACAT   | CCGTATTAGGGG        | CAGGGGG     | CAAA    | CCAAGATCACTTTAAG  | CTCACCT       | CCCTT      | CCTGTGCTAA  | 1620 |   |   |  |   |    |  |   |   |  |  |
| AY563953  | GTTCTCAAG--TAATACTCCCCCTCAAAAA                                                             | ---  | TACAT   | CCGTATTAGGGG        | CAGGGGG     | CAAA    | CCAAGATCACTTTAAG  | CTCACCT       | CCCTT      | CCTGTGCTAA  | 1620 |   |   |  |   |    |  |   |   |  |  |
| AY563954  | GTTCTCAAG--TAATACTCCCCCTCAAAAA                                                             | ---  | TACAT   | CCGTATTAGGGG        | CAGGGGG     | CAAA    | CCAAGATCACTTTAAG  | CTCACCT       | CCCTT      | CCTGTGCTAA  | 1620 |   |   |  |   |    |  |   |   |  |  |
| U19949    | GTTCTCAAG--TAATACTCCCCCTCAAAAA                                                             | ---  | TACAT   | CCGTATTAGGGG        | CAGGGGG     | CAAA    | CCAAGATCACTTTAAG  | CTCACCT       | CCCTT      | CCTGTGCTAA  | 1620 |   |   |  |   |    |  |   |   |  |  |
| J02029    | GTTCTCAAG--TAATACTCCCCCTCAAAAA                                                             | ---  | TACAT   | CCGTATTAGGGG        | CAGGGGG     | CAAA    | CCAAGATCACTTTAAG  | CTCACCT       | CCCTT      | CCTGTGCTAA  | 1620 |   |   |  |   |    |  |   |   |  |  |
| D13748    | GTTCTCAAG--TAATACTCCCCCTCAAAAA                                                             | ---  | CACAT   | CCGTATTAGGGG        | CAGGGGG     | CAAA    | CCAAGATCACTTTAAG  | CTCACCT       | CCCTT      | CCTGTGCTAA  | 1620 |   |   |  |   |    |  |   |   |  |  |
| AF033817  | GTTCTCAAG--TAATACTCCCCCTCAAAAA                                                             | ---  | CACAT   | CCGTATTAGGGG        | CAGGGGG     | CAAA    | CCAAGATCACTTTAAG  | CTCACCT       | CCCTT      | CCTGTGCTAA  | 1620 |   |   |  |   |    |  |   |   |  |  |
| NC_001436 | GTTCTCAAG--TAATACTCCCCCTCAAAAA                                                             | ---  | CACAT   | CCGTATTAGGGG        | CAGGGGG     | CAAA    | CCAAGATCACTTTAAG  | CTCACCT       | CCCTT      | CCTGTGCTAA  | 1620 |   |   |  |   |    |  |   |   |  |  |
| AF074966  | GTTCTCAAG--TAATACTCCCCCTCAAAGA                                                             | ---  | CACAT   | CCGTATTAGGGG        | CAGGAGG     | CAAA    | CCAAGATCACTTTAAG  | CTCACCT       | CCCTT      | CCTGTGCTAA  | 1617 |   |   |  |   |    |  |   |   |  |  |
| NC_000858 | GTTCTCAAG--TAATACTCCCCCTCAAAGA                                                             | ---  | CACAT   | CCGTATTAGGGG        | CAGGAGG     | CAAA    | CCAAGATCACTTTAAG  | CTCACCT       | CCCTT      | CCTGTGCTAA  | 1617 |   |   |  |   |    |  |   |   |  |  |
| L02534    | ATTCTCAAG--TGACACTCCCCCTTAAAGA                                                             | ---  | CACAT   | CCGTATTAGGGG        | CAGGAGG     | CAAA    | CCAAGATCACTTTAAG  | CTCACCT       | CCCTT      | CCTGTGCTAA  | 1625 |   |   |  |   |    |  |   |   |  |  |
| Z46900    | ATTCTCAAA--TAACACCCCCCTTAAAAA                                                              | ---  | CACAT   | CTGTACTAGGGG        | CAGGAGG     | CAAA    | CTAAGATCACTTTAAG  | CTCACCT       | CCCTT      | CCTGGTGCTAA | 1618 |   |   |  |   |    |  |   |   |  |  |
| AY590142  | GTTTCCGGA--AAATACCCCCCTTAAAAA                                                              | ---  | CACCG   | CAGTTGTAGGAG        | CAGGAGG     | CAAA    | CTAAGATCAGTTTAAAT | TCGCT         | CCCTT      | CCTGGTGCTAA | 1653 |   |   |  |   |    |  |   |   |  |  |
| AF033818  | GCTGGTTCGAGATTACCCAC                                                                       | ---- | GGAT    | CCCCGCGCGGTGCTCGGAG | CAGGGGGAGT  | CTCCCG  | GAAACAGATACAATTGG | CTACA         | AGGCCCT    | CTGAC       | 1585 |   |   |  |   |    |  |   |   |  |  |
| NC_001414 | GCTGGTTCGAGATTACCCAC                                                                       | ---- | GGAT    | CCCCGCGCGGTGCTCGGAG | CAGGGGGAGT  | CTCCCG  | GAAACAGATACAATTGG | CTACA         | AGGCCCT    | CTGAC       | 1585 |   |   |  |   |    |  |   |   |  |  |
| K02120    | GCTGGTTCGAGATTACCCAC                                                                       | ---- | GGAT    | CCCCGCGCGGTGCTCGGAG | CAGGGGGAGT  | CTCCCG  | GAAACAGATACAATTGG | CTACA         | AGGCCCT    | CTGAC       | 1582 |   |   |  |   |    |  |   |   |  |  |
| D00647    | GCTGGTTCGAGATTACCCAC                                                                       | ---- | GGAC    | CCCCGCGCGGTACTCGGAG | CAGGAGGAAT  | CTCCCG  | GAAACAGATACAATTGG | CTACA         | AGGCCCT    | CTGAC       | 1582 |   |   |  |   |    |  |   |   |  |  |
| AF257515  | GCTGGTTCGAGAATAACCCAC                                                                      | ---- | GGAC    | CCCCGCGCGAGTCTCGGAG | CAGGGGGGAAT | CTCCCG  | GAAACAGATACAATTGG | CTACA         | AGGCCCT    | CTGAC       | 1585 |   |   |  |   |    |  |   |   |  |  |
| ruler     | .....1710.....1720.....1730.....1740.....1750.....1760.....1770.....1780.....1790.....1800 |      |         |                     |             |         |                   |               |            |             |      |   |   |  |   |    |  |   |   |  |  |

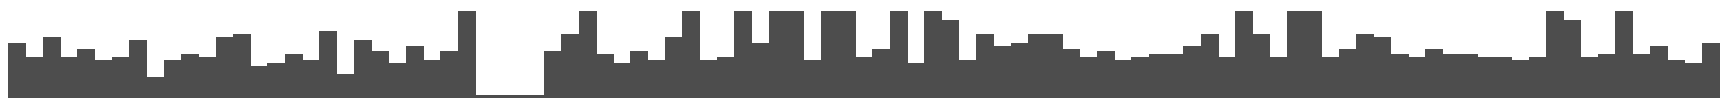

```

      * * *      ** *      ** *      * **      * * *      * * *      **      ** * * *
M10060 TATTCTTGCCCTT----CCGAAGGTCCCCGTTATCCTTTCTCCTG-----CCTCTTAGACACCCACAACAAATGGACCATCATT--GGAAGGGACGCC 1698
NC_001488 TATTCTTGCCCTT----CCGAAGGTCCCCGTTATCCTTTCTCCTG-----CCTCTTAGACACCCACAACAAATGGACCATCATT--GGAAGGGACGCC 1698
AF412314 TATTCTTGCCCTT----CCGAAAGTCCCCGTTATCCTTTCTCCTG-----CCTCTTAGACACCCACAACAAATGGACCATCATT--GGAAGGGACGCC 1698
AF139382 TATTCTTGCCCTT----CCGAAAGTCCCCGTTATCCTTTCTCCTG-----CCTCTTAGACACCCACAACAAATGGACCATCATT--GGAAGGGACGCC 1698
AF326584 TATTCTTGCCCTT----CCGAAGGTCCCCGTTATCCTTTCTCCTG-----CCTCTTAGACACCCACAACAAATGGACCATCATT--GGAAGGGACGCC 1698
AF326583 TATTCTTGCCCTT----CCGAAAGTCCCCGTTATCCTTTCTCCTG-----CCTCTTAGACACCCACAACAAATGGACCATCATT--GGAAGGGACGCC 1698
L20734 TATTCTTACCCTT----CCGAAAGTCCCCGTTATCTTCCCTCCTG-----TCTCTTAGACACCCACAACAAATGGACCATCATT--GGAAGAGACGCC 1698
Y13051 TATTCTTACCCTT----CCGAAAGTCCCCGTTATCTTCCCTCCTG-----TCTCTTAGACACCCACAACAAATGGACCATCATT--GGAAGAGACGCC 1698
L11456 TATTCTTACCCTT----CCGAAAGTCCCCGTTATCTTCCCTCCTG-----TCTCTTAGACACCCACAACAAATGGACCATCATT--GGAAGAGACGCC 1698
X89270 TATTCTTACCCTT----CCGAAAGTCCCCGTTATCTTCCCTCCTG-----TCTCTTAGACACCCACAACAAATGGACCATCATT--GGAAGGGACGCC 1698
AF074965 TATTCTTACCCTT----CCGAAAGTCCCCGTTATCTTCCCTCCTG-----TCTCTTAGACACCCACAACAAATGGACCATCATT--GGAAGAGACGCC 1633
Y14365 TATTCTTACCCTT----CCGAAAGTCCCCGTTATCTTCCCTCCTG-----TCTCTTAGACACCCACAACAAATGGACCATCATT--GGGAGGGATGCC 1698
Y14570 TCTACCTACCCTT----CCGGAGGGCCCTGTTACCCTCCCATCATG-----CCTTGTAGACACCAATAGCAAATGGGCCATTATT--GGCCGTGATATCC 1686
NC_001815 TCTACCTACCCTT----CCGGAGGGCCCTGTTACCCTCCCATCATG-----CCTTGTAGACACCAATAGCAAATGGGCCATTATT--GGCCGTGATATCC 1686
U90557 TCTACCTGCCCTT----CCGGAAAGGCCCCCGTTACTCTCCCGTCATG-----CCTTCTAGACACCGATAATAAATGGGCCATTATT--GGCCGTGATATCC 1683
Y07616 TCCATTTGCCCTT----CCGAAGGCAGCCAGTAACCTTAACTTTG-----CCTAATCGACACCAACAACCAATGGGCCAT--ATTAGGACGAGATGCC 1669
AY217650 TCCATTTGCCCTT----CCGAAGGCAGCCAGTAACCTTAACTTTG-----CCTAATCGACACCAACAACCAATGGGCCAT--ATTAGGACGAGATGCC 1666
AF517775 TCCATTTGCCCTT----CCGAAGAGCAGCCAGTGACCTGACCTCTTG-----TCTAATCGATGTTAACAACCAAGTGGCCAT--ATTAGGGCGGGACGCC 1665
AY22339 TCCACTTGCCCTT----CCGAAGACAGCCAGTGACCTAACCCTTTG-----CCTAATCGATATTAACAACCAATGGACCAT--ATTAGGACGGGACGCC 1665
NC_003323 TCCACTTGCCCTT----CCGGAAACGGCCAGTAACCTTAACTTTG-----CCTAATTGATACCTAACGATCAGTGGACTAT--ACTAGGACGGGATGCTC 1666
L36905 TACGCCTCCCTTT----CCGGACAACGCCTATTGTTTAAACATCTTG-----CCTAGTTGATACCAAAAAACAACGGGCCATCATA--GGTCGTGATGCCT 1710
AF139170 TACGCCTCCCTTT----CCGGACAACGCCTATTGTTTAAACATCTTG-----CCTAGTTGATACCAAAAAACAACGGGCCATCATA--GGTCGTGATGCCT 1698
AF042071 TACGCCTCCCTTT----CCGGACAACGCCTATTATTTTAAACATCGTG-----CCTAGTTGATACCAAAAAACAACGGGCCATCATA--GGTCGTGATGCCT 1710
L03561 TACGCCTCCCTTT----CCGGACAACGCCTATTGTTTAAACATCTTG-----CCTAGTTGATACCAAAAAACAACGGGCCATCATA--GGTCGTGATGCCT 1710
AF259264 TACGCCTCCCTTT----CCGGACAACGCCTATTGTTTAAACATCTTG-----CCTAGTTGATACCAAAAAACAACGGGCCATCATA--GGTCGCGATGCCT 1710
AY563953 TACGCCTCCCTTT----CCGGACAACGCCTATTGTTTAAACATCTTG-----CCTAGTTGATACCAAAAAACAACGGGCCATCATA--GGTCGTGATGCCT 1710
AY563954 TACGCCTCCCTTT----CCGGACAACGCCTATTGTTTAAACATCTTG-----CCTAGTTGATACCAAAAAACAACGGGCCATCATA--GGTCGTGATGCCT 1710
U19949 TACGCCTCCCTTT----CCGGACAACGCCTATTGTTTAAACATCTTG-----CCTAGTTGATACCAAAAAACAACGGGCCATCATA--GGTCGTGATGCCT 1710
J02029 TACGCCTCCCTTT----CCGGACAACGCCTATTGTTTAAACATCTTG-----CCTAGTTGATACCAAAAAACAACGGGCCATCATA--GGTCGTGATGCCT 1710
D13748 TACGCCTCCCTTT----CCGGACGACGCCTATTGTTTAAACATCTTG-----CCTAGTTGATACCAAAAAACAACGGGCCATCATA--GGTCGTGATGCCT 1710
AF033817 TACGCCTCCCTTT----CCGGACGACGCCTATTGTTTAAACATCTTG-----CCTAGTTGATACCAAAAAACAACGGGCCATCATA--GGTCGTGATGCCT 1710
NC_001436 TACGCCTCCCTTT----CCGGACGACGCCTATTGTTTAAACATCTTG-----CCTAGTTGATACCAAAAAACAACGGGCCATCATA--GGTCGTGATGCCT 1710
AF074966 TACGCCTCCCTTT----CCGGACAACGCCTATTGTTTAAACATCTTG-----CCTAGTTGATACCGAAAAACAACGGGCCATCATA--GGTCGTGATGCCT 1707
NC_000858 TACGCCTCCCTTT----CCGGACAACGCCTATTGTTTAAACATCTTG-----CCTAGTTGATACCGAAAAACAACGGGCCATCATA--GGTCGTGATGCCT 1707
L02534 TACGCCTCCCTTT----CCGGACAACGCCTATTGTTTAAACATCTTG-----CCTAGTCGATACCAAAAAACAACGGGCCATCATA--GGTCGTGATGCCT 1715
Z46900 TACGCCTCCCTTT----CCGGACAACGCCTATTGTTTAAACATCTTG-----CCTAGTCGATACCAAAAAACAACGGGCCATCATA--GGTCGTGACGCCT 1708
AY590142 TTCACCTCCCTTT----CCGGACGACACCCATTGTTTAACTCATG-----CCTTATAGATACCGAAAAACAACGGGTCATAATT--GGCCGCGACGCC 1743
AF033818 ----CCTGGCTCTAAAACAGAGGGTCCCTTTA----TCACCATCCCAAAAATTTTAGTTGACACTTTCGATAAATGGCAAATTTTA--GGACGGGACGTCC 1677
NC_001414 ----CCTGGCTCTAAAACAGAGGGTCCCTTTA----TCACCATCCCAAAAATTTTAGTTGACACTTTCGATAAATGGCAAATTTTA--GGACGGGACGTCC 1677
K02120 ----CCTGGCTCTAAAACAGAGGGTCCCTTTA----TCACCATCCCAAAAATTTTAGTTGACACTTTCGATAAATGGCAAATTTTA--GGACGGGACGTCC 1674
D00647 ----CCTGGCTCTAAAACAGAGGGTCCCTTTA----TCACCATCCCAAAAATTTTAGTTGACACTTTCGATAAATGGCAAATTTTA--GGACGGGACGTCT 1674
AF257515 ----CCTGGCTATAAAAACAGAGGGTCCCTTTA----TCACCATCCCAAAAATTTTAGTTGACACTTTCGACAAAATGGCAAATTTTA--GGACGGGACGCCT 1677
ruler .....1810.....1820.....1830.....1840.....1850.....1860.....1870.....1880.....1890.....1900

```

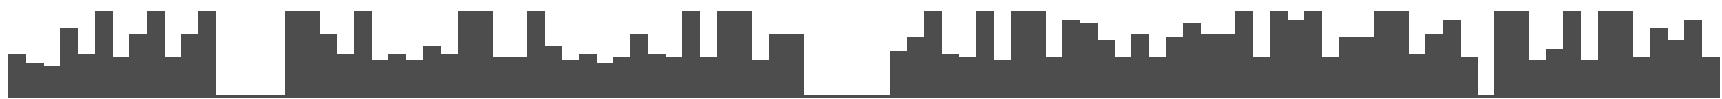

\* \* \* \*      \* \* \* \*      \* \* \* \*      \* \* \* \*      \* \*      \*

M10060 TACAACAATGCC-AGGGGCTTCTATAACC--TCCCAGACGAC-----CCCAGCCCCC-----ACCAAT-TGC--T 1756  
 NC\_001488 TACAACAATGCC-AGGGGCTTCTATAACC--TCCCAGACGAC-----CCCAGCCCCC-----ACCAAT-TGC--T 1756  
 AF412314 TACAACAATGCC-AGGGGCTTCTATAACC--TCCCAGACGAC-----CCCAGCCCCC-----ACCAAT-TGC--T 1756  
 AF139382 TACAACAATGCC-AGGGGCTTCTATAACC--TTCCAGACGAC-----CCCAGCCCCC-----ACCAAT-TGC--T 1756  
 AF326584 TACAACAATGCC-AGGGGCTTCTATAACC--TTCCAGACGAC-----CCCAGCCCCC-----ACCAAT-TGC--T 1756  
 AF326583 TACAACAATGCC-AGGGGCTTCTATAACC--TTCCAGACGAC-----CCCAGCCCCC-----ACCAAT-TGC--T 1756  
 L20734 TACAACAATGCC-AGGGGCTTCTATAACC--TTCCAGACGAT-----CCCAGCCCCC-----ATCAAT-TGC--T 1756  
 Y13051 TACAACAATGCC-AGGGGCTTCTATAACC--TTCCAGACGAT-----CCCAGCCCCC-----ATCAAT-TGC--T 1756  
 L11456 TACAACAATGCC-AGGGGCTTCTATAACC--TTCCAGACGAT-----CCCAGCCCCC-----ACCAAT-TGC--T 1756  
 X89270 TACAACAATGCC-AGGGGCTTCTATAACC--TTCCAGACGAT-----CCCAGCCCCC-----ACCAAT-TGC--T 1756  
 AF074965 TACAACAATGCC-AGGGGCTTCTATAACC--TTCCAGACGAT-----CCCAGCCCCC-----ACCAAT-TGC--T 1691  
 Y14365 TGCAACAATGCC-AGGGACTTCTATAACC--TCCCAGACGAT-----CCCAGCCCCCGGT-----GCTCCCACCAAT-TGC--T 1765  
 Y14570 TCCAGAAATGCC-AGAGTGTCTGTACC--TTCCGGAGGACAATCTGTGCAAGGGTACCCCCGGTCCCCGATGGAATAACTCCTCCCCGAT-TAT--T 1780  
 NC\_001815 TCCAGAAATGCC-AGAGTGTCTGTACC--TTCCGGAGGACAATCTGTGCAAGGGTACCCCCGGTCCCCGATGGAATAACTCCTCCCCGAT-TAT--T 1780  
 U90557 TCCAGCAATGCC-AGAGTGTCTGTACC--TCCCGGAGGACAATCTCTGCAAGGTACCCCCGGCCCTCCGGCAGAATGAATTCCCCCGAC-TAT--T 1777  
 Y07616 TACAACAATGTC-AGAGTTCCCTTTATC--TTGCTGA-----CCAACCCCC-----GGAGGTCC--T 1721  
 AY217650 TACAACAATGTC-AGAGTTCCCTCTATC--TTGCTGA-----CCAACCCCC-----GGAGATCC--T 1718  
 AF517775 TACAACAGTGTC-AGGGCTCCCTCTATC--TGGCTGA-----CCAGCCCTC-----GAGTGTCC--T 1717  
 AY222339 TACAACAGTGTC-AGGGCTCCCTCTATC--TGGCGGA-----CCAACCTC-----AAATGTCC--T 1717  
 NC\_003323 TGCAACAGTGTC-AAAGCTCCCTCTACC--TTGCTGA-----CCAACCTC-----AAGTGTTT--T 1718  
 L36905 TACAACAATGCC-AAGGCGCCTGTACC--TCCCTGAGGCAA-----AGGGCCGCC-----TGTAAT--CT-T 1768  
 AF139170 TACAACAATGCC-AAGGCGTCTGTACC--TCCCTGAGGCAA-----AGGGCCGCC-----TGTAAT--CT-T 1756  
 AF042071 TACAACAATGCC-AAGGCGTCTGTACC--TCCCTGAGGCAA-----AGGGCCGCC-----TGTAAT--CT-T 1768  
 L03561 TACAACAATGCC-AGGGCGTCTGTACC--TCCCTGAGGCAA-----AGGGCCGCC-----TGTAAT--CT-T 1768  
 AF259264 TACAACAATGCC-AGGGCGTCTGTACC--TCCCTGAGGCAA-----AGGGCCGCC-----TGTAAT--CT-T 1768  
 AY563953 TACAACAATGCC-AAGGCGTCTGTACC--TCCCTGAGGCAA-----AGGGCCGCC-----TGTTAT--CT-T 1768  
 AY563954 TACAACAATGCC-AAGGCGTCTGTACC--TCCCTGAGGCAA-----AGGGCCGCC-----TGTTAT--CT-T 1768  
 U19949 TACAACAATGCC-AAGGCGTCTGTACC--TCCCTGAGGCAA-----AAGGCCGCC-----TGTAAT--CT-T 1768  
 J02029 TACAACAATGCC-AAGGCGTCTGTACC--TCCCTGAGGCAA-----AAGGCCGCC-----TGTAAT--CT-T 1768  
 D13748 TACAACAATGCC-AAGGCGTCTGTACC--TCCCTGAGGCAA-----AAGGCCGCC-----TGTAAT--CT-T 1768  
 AF033817 TACAACAATGCC-AAGGCGTCTGTACC--TCCCTGAGGCAA-----AAGGCCGCC-----TGTAAT--CT-T 1768  
 NC\_001436 TACAACAATGCC-AAGGCGTCTGTACC--TCCCTGAGGCAA-----AAGGCCGCC-----TGTAAT--CT-T 1768  
 AF074966 TACAACAATGCC-AAGGCGTCTGTACC--TCCCTGAGGCAA-----AGGGCCGCC-----AGTAAT--CC-T 1765  
 NC\_000858 TACAACAATGCC-AAGGCGTCTGTACC--TCCCTGAGGCAA-----AGGGCCGCC-----AGTAAT--CC-T 1765  
 L02534 TACAGCAATGCC-AAGGCGTTCTGTATC--TTCCCTGAGGCAA-----AAGGCCGCC-----TGTAAT--TCT-T 1774  
 Z46900 TACAACAATGCC-AAGGCGTCTATATC--TTCCCGAGGCAA-----GGGGCCGTC-----TGTCAT--CT-T 1766  
 AY590142 TACAGCAATGCC-AAGGGGCCCTATAACC--TCCCTGAGGCAAG--TCGCCCACC-----ACTAAT--AC--T 1801  
 AF033818 TCTCCC---GCCTACAGGCCTCTATCTCCATACCTGAGGAGGT--ACGCCCCCC-----CATGGTAGGCG--T 1738  
 NC\_001414 TCTCCC---GCCTACAGGCCTCTATCTCCATACCTGAGGAGGT--ACGCCCCCC-----CATGGTAGGCG--T 1738  
 K02120 -CTCCC---GCCTACAGGCTTCTATCTCCATACCTGAGGAAGT-----ACGCCCCCC-----TGTTGGTAGGCG--T 1734  
 D00647 -CTCCC---GCCTACAGGCTTCTATCTCCATACCTGAGGAAGT-----ACACCCCCC-----TGTTGGTAGGCG--T 1734  
 AF257515 -CTCCC---GGCTACAGGCTTCTATCTCCATACCTGAGGAAGT-----ACCCCCCCC-----TGTTGGTAGGCG--T 1737

ruler .....1910.....1920.....1930.....1940.....1950.....1960.....1970.....1980.....1990.....2000

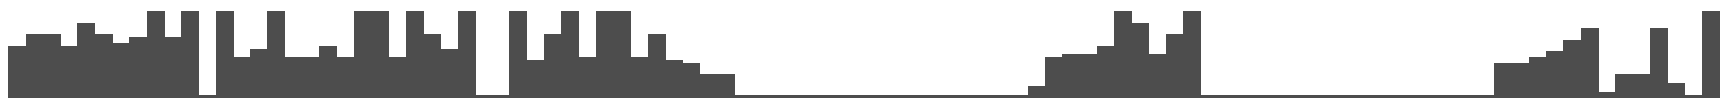



\*                   \*   \*                   \*   \*\*   \*   \*\*   \*\*   \*   \*\*                   \*\*   \*\*   \*   \*                   \*\*   \*\*   \*   \*                   \*\*\*\*\*   \*\*   \*\*   \*\*\*\*\*                   \*

|           |                                                                                                      |      |
|-----------|------------------------------------------------------------------------------------------------------|------|
| M10060    | GCCAA-T--AGCCACTCCAAACACCATAGGCCTCGAACACCTTCCCCACCTCCCCAAGTGGACCAATTTCC--TTTAAACCTGAGCGCCTCCAGGCCTTA | 1852 |
| NC_001488 | GCCAA-T--AGCCACTCCAAACACCATAGGCCTCGAACACCTTCCCCACCTCCCCAAGTGGACCAATTTCC--TTTAAACCTGAGCGCCTCCAGGCCTTA | 1852 |
| AF412314  | GCCAA-T--AGCCACTCCAAACACCATAGGCCTCGAACACCTTCCCCACCTCCCCAAGTGGACCAATTTCC--TTTAAACCTGAGCGCCTCCAGGCCTTA | 1852 |
| AF139382  | GCCAA-T--AGCCACCCCAAACACCATAGGCCTCGAACACCTTCCCCACCTCCCCAAGTGGACCAATTTCC--TTTAAACCTGAGCGCCTCCAGGCCTTA | 1852 |
| AF326584  | GCCAA-T--AGCCACCCCAAACACCATAGGCCTCGAACACCTTCCCCACCTCCCCAAGTGGACCAATTTTC--TTTAAACCTGAGCGCCTCCAGGCCTTA | 1852 |
| AF326583  | GCCAA-T--AGCCACCCCAAACACCATAGGCCTCGAACACCTTCCCCACCTCCCCAAGTGGACCAATTTCC--TTTAAACCTGAGCGCCTCCAGGCCTTA | 1852 |
| L20734    | GCCAA-T--AGCCACTCCACACACCATAGGCCTCGAACACCTTCCCCACCGCCCCAGGTGGACCAATTTCC--TTTAAACCTGAGCGCCTCCAGGCCTTA | 1852 |
| Y13051    | GCCAA-T--AGCCACTCCACACACCATAGGCCTCGAACACCTTCCCCACCGCCCCAGGTGGACCAATTTCC--TTTAAACCTGAGCGCCTCCAGGCCTTA | 1852 |
| L11456    | GCCAA-T--AGCCACTCCACACACCATAGGCCTCGAACACCTTCCCCACCGCCCCAGGTGGACCAATTTCC--TTTAAACCTGAGCGCCTCCAGGCCTTA | 1852 |
| X89270    | GCCAA-T--AGCCACTCCACACACCATAGGCCTCGAACACCTTCCCCACCGCCCCAGGTGGACCAATTTCC--TTTAAACCTGAGCGCCTCCAGGCCTTA | 1852 |
| AF074965  | GCCAA-T--ATCCACTCCACACCCCATAGGCTTCGAACACCTTCCCCACCGCCGCAGGTGGACCAATTTCC--TTTAAACCTGAGCGCCTCCAGGCCTTA | 1787 |
| Y14365    | GCCAA-T--AGCCACTCCAAACACCATAGGCCTCGAACACCTTCCCCACCTCCCCAGGTGGACCAATTTCC--TTTAAACCTGAGCGCCTCCAGGCCTTA | 1861 |
| Y14570    | ACCCG-T--GACCACCCCAATGTCATTGGCCTTGAGCACTTCCCAACCCCCACAGATAGATCAGTTCC--TTTAAACCTGAGCGCCTCCAGGCCTTG    | 1876 |
| NC_001815 | ACCCG-T--GACCACCCCAATGTCATTGGCCTTGAGCACTTCCCAACCCCCACAGATAGATCAGTTCC--TTTAAACCTGAGCGCCTCCAGGCCTTG    | 1876 |
| U90557    | ACCCG-T--GGCCACCCCAAGTGTATCGGCCTTGAGCACTTCCCAACCCCCACAGATAGATCAGTTCC--TTTAAACCTGAGCGCCTCCAGGCCTTG    | 1874 |
| Y07616    | CCCCG-TTCAAACAC-CCAAGC-TCATTGGGCTAGAACACCTGCCTCCGCCCCGGAAATCTCGCAGTTCC--GTTAAACCGGAACGCCTCCAGGCCTTG  | 1817 |
| AY217650  | CCCCG-TTCAAACAC-CCAAGC-TTATTGGTTTAGAGCACCTGCCCCCGCCCCGGAGGTCTCGCAGTTCC--GTTAAACCGAAGCGCCTCCAGGCCTTG  | 1814 |
| AF517775  | CCCTG-TTCAGACAC-CCAAGC-TTATCGGATTAGAACACCTTCCCCGCCCCGGAAATCTCTCAGTTCC--GTTAAACCGGAGCGCCTCCAGGCCTTG   | 1813 |
| AY222339  | TCCTG-TCCAAACAC-CCAAGC-TTATTGGATTAGAACACCTTCCCCGCCCCAGAAATTTCTCAGTTCC--GTTAAACCGGAGCGCCTCCAGGCCTTG   | 1813 |
| NC_003323 | CCCTG-TCCAAACAC-CCAAGC-TTATTGGTTAGAACATCTTCCCCGCCCCGGAGGTCTCGCAGTTCC--GTTAAACCGGAGCGCCTCCAGGCCTTG    | 1814 |
| L36905    | GCCAA-TACAGGCGC--CAGCGTCCTTGGGCTAGAACACCTCCCAAGGCCCCCCGAAATCAGCCAGTTCC--TTTAAACCGAAGCGCCTCCAGGCCTTG  | 1864 |
| AF139170  | GCCAA-TACAGGCGC--CAGCGTCCTTGGGCTAGAACACCTCCCAAGGCCCCCCGAAATCAGCCAGTTCC--TTTAAACCGAAGCGCCTCCAGGCCTTG  | 1852 |
| AF042071  | GCCAA-TACAGGCGC--CAGCGTCCTTGGGCTAGAACATCTCCCAAGGCCCCCCGAAATCAGCCAGTTCC--TTTAAACCGAAGCGCCTCCAGGCCTTG  | 1864 |
| L03561    | GCCAA-TACAGGCGC--CAGCGTCCTTGGACTAGAACACCTCCCAAGGCCCCCCGAAATCAGCCAGTTCC--TTTAAACCGAAGCGCCTCCAGGCCTTG  | 1864 |
| AF259264  | GCCAA-TACAGGCGC--CAGCGTCCTTGGGCTAGAACACCTCCCAAGGCCCCCCGAAATTAGCCAGTTCC--TTTAAACCGAAGCGCCTCCAGGCCTTG  | 1864 |
| AY563953  | GCCAA-TACAGGCGC--CAGCGTCCTTGGGCTAGAACACCTCCCAAGGCCCCCCGAAATCAGCCAGTTCC--TTTAAACCGAAGCGCCTCCAGGCCTTG  | 1864 |
| AY563954  | GCCAA-TACAGGCGC--CAGCGTCCTTGGGCTAGAACACCTCCCAAGGCCCCCCGAAATCAGCCAGTTCC--TTTAAACCGAAGCGCCTCCAGGCCTTG  | 1864 |
| U19949    | GCCAA-TACAGGCGC--CAGCGTCCTTGGGCTAGAACACCTCCCAAGGCCCCCCGAAATCAGCCAGTTCC--TTTAAACCGAAGCGCCTCCAGGCCTTG  | 1864 |
| J02029    | GCCAA-TACAGGCGC--CAGCGTCCTTGGGCTAGAACACCTCCCAAGGCCCCCCGAAATCAGCCAGTTCC--TTTAAACCGAAGCGCCTCCAGGCCTTG  | 1864 |
| D13748    | GCCAA-TACAGGCGC--CAGCTGTCTTGGGCTAGAACACCTCCCAAGGCCCCCCGAAATCAGCCAGTTCC--TTTAAACCGAAGCGCCTCCAGGCCTTG  | 1864 |
| AF033817  | GCCAA-TACAGGCGC--CAGCTGTCTTGGGCTAGAACACCTCCCAAGGCCCCCCGAAATCAGCCAGTTCC--TTTAAACCGAAGCGCCTCCAGGCCTTG  | 1864 |
| NC_001436 | GCCAA-TACAGGCGC--CAGCTGTCTTGGGCTAGAACACCTCCCAAGGCCCCCCGAAATCAGCCAGTTCC--TTTAAACCGAAGCGCCTCCAGGCCTTG  | 1864 |
| AF074966  | GCCTA-TACAGGTGC--CAGCGTCCTTGGGCTAGAACACCTCCCAAGGCCACCTGAAATCAGCCAGTTCC--TTTAAACCGAAGCGCCTCCAGGCCTTG  | 1861 |
| NC_000858 | GCCTA-TACAGGTGC--CAGCGTCCTTGGGCTAGAACACCTCCCAAGGCCACCTGAAATCAGCCAGTTCC--TTTAAACCGAAGCGCCTCCAGGCCTTG  | 1861 |
| L02534    | GCCAA-TACAGGCGC--CAGCGTCCTTGGACTAGAACACCTCCCAAGGCCCCCAGAAATTAGCCAGTTCC--TTTAAACCGAAGCGCCTCCAGGCCTTG  | 1870 |
| Z46900    | ACCAA-TACAGACGC--CAGCGTCCTTGGGCTAGAGCACCTCCCGAAGGCCCCCCGAAATTAGCCAGTTCC--TTTAAACCGAAGCGCCTCCAGGCCTTG | 1862 |
| AY590142  | GCCAG-TTCAAGGCGC--CGGCCATGTAGGCCTCGAGCATTTCACAAAACCCCCGAAATCAGCCAGTTTCC--TTTAAACCTGAACGCCTCCAGGCCTTG | 1897 |
| AF033818  | CCTAGAT---GCCCCCAGCCACATTGGATTAGAACATTTGCCCGTCCCACCTGAGGTACCTCAATTCC--TTTAAACTAGAACGCCTCCAGGCCTTG    | 1834 |
| NC_001414 | CCTAGAT---GCCCCCAGCCACATTGGATTAGAACATTTGCCCGTCCCACCTGAGGTACCTCAATTCC--TTTAAACTAGAACGCCTCCAGGCCTTG    | 1834 |
| K02120    | CTTGGAT---ACCCCCGAGCCACATTGGATTAGAACATCTGCCCCCCACCTGAGGTGCCTCAATTCC--TTTAAACTAGAACGCCTCCAGGCCTTG     | 1830 |
| D00647    | CTTAGAT---GCCCCCAGCCACATTGGATTAGAACATTTGCCCCCCACCTGAGGTACCTCAATTCC--TTTAAACTAGAACGCCTCCAGGCCTTG      | 1830 |
| AF257515  | CTTGGAT---GCCCCCAGCCACATTGGATTAGAACATCTGCCCCCCACCTGAGGTACCTCAATTCC--TTTAAACTAGAACGCCTCCAGGCCTTG      | 1833 |

ruler           .....2010.....2020.....2030.....2040.....2050.....2060.....2070.....2080.....2090.....2100

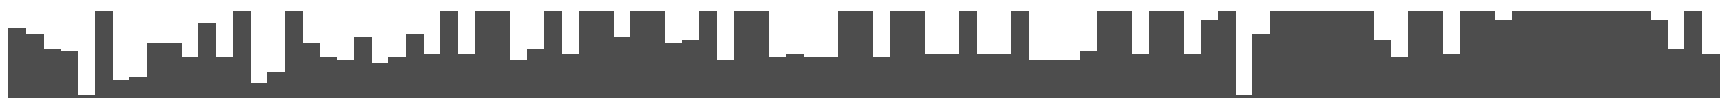

Supplement: MOESM1 [file 12977_2006_740_MOESM1_ESM.pdf]
